# Supplementary material
Source: publisher site journal article supplement (https://www.dovepress.com/article/348943)
Supplement: Supplementary file 1 [file get_supplementary_file.php]

## Supplementary materials

**Table S1:** The clinical information of patients.

| Id           | futime | fustat | Age | Gender | Grade | Stage      | T   | M  | N   |
|--------------|--------|--------|-----|--------|-------|------------|-----|----|-----|
| TCGA-VQ-A8PS | 406    | 1      | 76  | MALE   | G2    | Stage IIIA | T3  | M0 | N1  |
| TCGA-CG-4301 | 92     | 0      | 75  | FEMALE | G3    | Stage IV   | T4  | M1 | N1  |
| TCGA-R5-A7ZR | 185    | 1      | 70  | FEMALE | G2    | Stage III  | T3  | M0 | NX  |
| TCGA-VQ-AA64 | 560    | 1      | 68  | MALE   | G2    | Stage IIIB | T3  | M0 | N2  |
| TCGA-BR-8686 | 635    | 1      | 69  | MALE   | G3    | Stage IIIB | T4b | M0 | N1  |
| TCGA-B7-A5TJ | 335    | 0      | 74  | MALE   | G1    | Stage IIB  | T4a | M0 | NX  |
| TCGA-BR-A4QL | 491    | 1      | 75  | FEMALE | G2    | Stage IIIB | T3  | M0 | N3a |
| TCGA-D7-6817 | 389    | 0      | 63  | MALE   | G3    | Stage IIIA | T2b | M0 | N3  |
| TCGA-BR-4366 | 0      | 0      | 87  | MALE   | G2    | unknow     | TX  | M0 | NX  |
| TCGA-MX-A5UG | 113    | 1      | 78  | MALE   | G3    | Stage IIIA | T3  | M0 | N1  |
| TCGA-IN-A6RJ | 379    | 0      | 64  | MALE   | G3    | Stage IA   | T1b | M0 | N0  |
| TCGA-CG-4475 | 699    | 0      | 76  | MALE   | G3    | Stage IIB  | T3  | M0 | N1  |
| TCGA-BR-8591 | 856    | 0      | 79  | MALE   | G3    | Stage IIIC | T4a | M0 | N3a |
| TCGA-BR-8676 | 229    | 0      | 59  | MALE   | G3    | Stage IIIB | T3  | M0 | N3a |
| TCGA-D7-A4YV | 180    | 0      | 69  | FEMALE | G3    | Stage IIB  | T3  | M0 | N1  |
| TCGA-BR-8285 | 17     | 1      | 57  | FEMALE | G3    | Stage IIIC | T4a | M0 | N3a |
| TCGA-CD-5798 | 408    | 0      | 82  | MALE   | G2    | Stage II   | T3  | M0 | N0  |
| TCGA-FP-A4BF | 168    | 1      | 68  | MALE   | G3    | Stage IIIA | T3  | M0 | N2  |
| TCGA-VQ-A91D | 356    | 1      | 70  | MALE   | G2    | Stage IIIC | T4b | M0 | N2  |
| TCGA-BR-4184 | 212    | 1      | 70  | MALE   | G2    | Stage IIIA | T3  | MX | N1  |
| TCGA-BR-8380 | 21     | 0      | 55  | MALE   | G3    | Stage IIIC | T4a | M0 | N3a |
| TCGA-VQ-A8PH | 389    | 1      | 62  | MALE   | G2    | Stage IIIB | T3  | M0 | N3  |
| TCGA-BR-8382 | 762    | 1      | 67  | FEMALE | G3    | Stage IIIC | T4b | M0 | N3a |
| TCGA-FP-A9TM | 189    | 0      | 77  | MALE   | G2    | unknow     | T1b | M0 | N1  |
| TCGA-BR-8058 | 1133   | 0      | 53  | FEMALE | G3    | Stage IIIB | T4a | M0 | N2  |
| TCGA-CG-4469 | 215    | 1      | 70  | MALE   | G3    | Stage IV   | T3  | M0 | N3  |
| TCGA-BR-6801 | 1223   | 0      | 70  | MALE   | G2    | Stage IIA  | T3  | M0 | N0  |
| TCGA-BR-8361 | 946    | 0      | 71  | FEMALE | G3    | Stage IIIC | T4b | M0 | N2  |
| TCGA-D7-6522 | 566    | 0      | 58  | MALE   | G3    | Stage IB   | T2  | M0 | N0  |
| TCGA-BR-4256 | 284    | 1      | 80  | MALE   | G2    | unknow     | TX  | M0 | N1  |
| TCGA-VQ-A91Z | 1690   | 0      | 67  | FEMALE | G2    | Stage IIIA | T3  | M0 | N1  |
| TCGA-VQ-A91V | 1297   | 0      | 58  | MALE   | G2    | Stage IIIA | T3  | M0 | N2  |
| TCGA-CG-4455 | 366    | 0      | 72  | MALE   | G3    | Stage II   | T2b | M0 | N1  |
| TCGA-CD-8529 | 374    | 0      | 65  | MALE   | G2    | Stage IV   | T4  | M1 | N0  |
| TCGA-D7-A74A | 607    | 0      | 61  | FEMALE | G2    | Stage IIIA | T3  | M0 | N2  |
| TCGA-CG-4443 | 912    | 0      | 68  | MALE   | G2    | Stage IA   | T1  | M0 | N0  |
| TCGA-BR-4368 | 0      | 0      | 78  | FEMALE | G3    | Stage IV   | T4  | M0 | N2  |
| TCGA-SW-A7EA | 579    | 0      | 61  | FEMALE | GX    | Stage IB   | T2  | M0 | N0  |
| TCGA-D7-6518 | 582    | 0      | 75  | MALE   | G3    | Stage IIIA | T2  | M0 | N3  |
| TCGA-CG-5725 | 457    | 1      | 72  | MALE   | G3    | Stage IB   | T2  | M0 | N0  |

|              |      |   |    |        |    |            |     |    |        |
|--------------|------|---|----|--------|----|------------|-----|----|--------|
| TCGA-VQ-A8PK | 543  | 1 | 58 | MALE   | G2 | Stage IIIB | T3  | M0 | N3a    |
| TCGA-BR-A4PE | 621  | 0 | 68 | FEMALE | G2 | Stage IB   | T2  | M0 | N0     |
| TCGA-BR-6563 | 1190 | 0 | 60 | MALE   | G3 | Stage IIB  | T3  | M0 | N1     |
| TCGA-D7-A6EX | 344  | 0 | 72 | FEMALE | G3 | Stage IIIA | T3  | M0 | N2     |
| TCGA-VQ-A91S | 1000 | 0 | 63 | MALE   | GX | Stage IIIB | T4b | M0 | N1     |
| TCGA-BR-4370 | 0    | 0 | 74 | FEMALE | G2 | unknow     | TX  | M0 | NX     |
| TCGA-BR-8373 | 450  | 0 | 65 | FEMALE | G2 | Stage IIIA | T4a | M0 | N1     |
| TCGA-CG-5718 | 1095 | 1 | 78 | FEMALE | G2 | Stage II   | T2b | M0 | N1     |
| TCGA-RD-A7BS | 336  | 1 | 46 | MALE   | G3 | Stage IIIA | T3  | M0 | N1     |
| TCGA-D7-A6EY | 348  | 1 | 72 | FEMALE | G3 | Stage IIIB | T3  | M0 | N3a    |
| TCGA-VQ-AA68 | 1328 | 0 | 52 | FEMALE | G2 | Stage IIIC | T4a | M0 | N3     |
| TCGA-BR-6802 | 940  | 0 | 65 | MALE   | G3 | Stage IIIA | T3  | M0 | N2     |
| TCGA-CG-4460 | 669  | 1 | 66 | FEMALE | G2 | Stage IV   | T4  | M1 | N1     |
| TCGA-CG-4474 | 0    | 0 | 67 | FEMALE | G3 | Stage IV   | T4a | M1 | N2     |
| TCGA-VQ-A8DU | 166  | 1 | 63 | MALE   | G2 | Stage IIIA | T3  | M0 | N2     |
| TCGA-BR-4267 | 188  | 1 | 51 | MALE   | G2 | Stage IB   | T2a | M0 | N0     |
| TCGA-RD-A8N4 | 2171 | 0 | 58 | FEMALE | G3 | Stage IIIA | T3  | M0 | N1     |
| TCGA-VQ-A91E | 664  | 0 | 67 | FEMALE | G3 | Stage IIIB | T4b | M0 | N0     |
| TCGA-IN-AB1X | 411  | 0 | 78 | FEMALE | G3 | Stage IIA  | T3  | M0 | N0     |
| TCGA-BR-8381 | 224  | 0 | 51 | MALE   | G3 | Stage IIB  | T3  | M0 | N1     |
| TCGA-HU-A4GH | 358  | 0 | 75 | MALE   | G2 | Stage IA   | T1b | M0 | N0     |
| TCGA-CG-5730 | 122  | 0 | 80 | FEMALE | G2 | Stage IV   | T2  | M1 | N1     |
| TCGA-BR-8286 | 895  | 0 | 49 | MALE   | G3 | Stage II   | T3  | M0 | N0     |
| TCGA-BR-A4PF | 35   | 0 | 72 | MALE   | G3 | Stage IIIB | T4a | M0 | N2     |
| TCGA-HU-A4H8 | 270  | 0 | 77 | MALE   | G2 | Stage IB   | T1b | M0 | N1     |
| TCGA-CD-8524 | 388  | 0 | 61 | FEMALE | G3 | Stage II   | T3  | M0 | N0     |
| TCGA-IN-A6RP | 196  | 0 | 63 | MALE   | G3 | unknow     | T1b | M0 | N3     |
| TCGA-B7-A5TK | 288  | 0 | 51 | MALE   | G3 | Stage IIIA | T4  | M0 | unknow |
| TCGA-CG-4438 | 1645 | 0 | 56 | MALE   | G3 | Stage IV   | T4  | M0 | N2     |
| TCGA-VQ-A8PP | 712  | 1 | 76 | MALE   | G2 | Stage IV   | T4  | M0 | N1     |
| TCGA-BR-4371 | 0    | 0 | 71 | FEMALE | G1 | unknow     | T2  | M0 | NX     |
| TCGA-BR-8296 | 474  | 1 | 58 | FEMALE | G3 | Stage IIIC | T4b | M0 | N2     |
| TCGA-VQ-A928 | 174  | 1 | 49 | MALE   | G2 | Stage IV   | T3  | M0 | N3     |
| TCGA-D7-8574 | 523  | 0 | 72 | MALE   | G3 | Stage IIIA | T2  | M0 | N3a    |
| TCGA-HU-A4H3 | 882  | 0 | 56 | FEMALE | G3 | Stage IIIC | T4a | M0 | N3b    |
| TCGA-D7-6524 | 543  | 0 | 53 | MALE   | G3 | Stage II   | T2  | M0 | N1     |
| TCGA-MX-A666 | 427  | 0 | 61 | MALE   | G2 | Stage IIA  | T2  | MX | NX     |
| TCGA-BR-8592 | 191  | 1 | 63 | FEMALE | G3 | Stage IIIB | T4b | M0 | N1     |
| TCGA-BR-6455 | 422  | 1 | 59 | MALE   | G3 | Stage IIB  | T3  | M0 | N1     |
| TCGA-BR-6707 | 605  | 1 | 75 | MALE   | G3 | Stage IIA  | T3  | M0 | N0     |
| TCGA-BR-A4PD | 628  | 0 | 72 | FEMALE | G3 | Stage IIB  | T4a | M0 | N0     |
| TCGA-D7-A74B | 217  | 1 | 52 | FEMALE | G3 | Stage IIIB | T3  | M0 | N3     |
| TCGA-CD-8533 | 468  | 0 | 48 | MALE   | G3 | Stage II   | T3  | M0 | N0     |
| TCGA-CD-A4MI | 358  | 1 | 62 | MALE   | G1 | Stage IIIA | T3  | M0 | N1     |

|              |      |   |    |        |    |            |     |    |     |
|--------------|------|---|----|--------|----|------------|-----|----|-----|
| TCGA-CG-4465 | 274  | 1 | 69 | FEMALE | G3 | Stage IV   | T4  | M1 | N3  |
| TCGA-CD-5803 | 341  | 1 | 78 | FEMALE | G3 | Stage II   | T3  | M0 | N0  |
| TCGA-D7-A6F0 | 678  | 0 | 79 | FEMALE | G3 | Stage IB   | T2  | M0 | N0  |
| TCGA-BR-7197 | 280  | 0 | 69 | MALE   | GX | Stage II   | T3  | M0 | N0  |
| TCGA-BR-8384 | 113  | 0 | 69 | MALE   | G3 | Stage IIIC | T4b | M0 | N2  |
| TCGA-F1-6874 | 440  | 0 | 79 | MALE   | G3 | Stage IB   | T2  | M0 | N0  |
| TCGA-CG-4449 | 580  | 0 | 81 | MALE   | G2 | Stage II   | T2  | M0 | N1  |
| TCGA-D7-6527 | 312  | 1 | 62 | MALE   | G2 | Stage II   | T2  | M0 | N1  |
| TCGA-VQ-AA6D | 521  | 0 | 52 | FEMALE | G2 | Stage IIIA | T4a | M0 | N1  |
| TCGA-CG-4477 | 942  | 0 | 58 | FEMALE | G3 | Stage IB   | T2a | M0 | N0  |
| TCGA-D7-6525 | 406  | 1 | 58 | MALE   | G3 | Stage IIIA | T2  | M0 | N2  |
| TCGA-IN-8462 | 572  | 0 | 80 | MALE   | G2 | Stage IIB  | T2  | M0 | N1  |
| TCGA-CD-A486 | 192  | 1 | 68 | MALE   | G2 | Stage IIA  | T3  | M0 | N0  |
| TCGA-HU-8610 | 23   | 0 | 75 | MALE   | G2 | Stage IA   | T1b | M0 | N0  |
| TCGA-BR-4363 | 0    | 0 | 60 | FEMALE | G3 | unknow     | T3  | MX | NX  |
| TCGA-VQ-A923 | 0    | 1 | 90 | MALE   | G3 | Stage IIIA | T3  | M0 | N1  |
| TCGA-HU-A4GU | 200  | 0 | 73 | MALE   | G3 | Stage IIB  | T3  | M0 | N1  |
| TCGA-CG-5727 | 2405 | 0 | 66 | MALE   | G3 | Stage II   | T3  | M0 | N0  |
| TCGA-RD-A8N5 | 1747 | 1 | 78 | MALE   | G2 | Stage IIIA | T3  | M0 | N1  |
| TCGA-B7-5816 | 812  | 0 | 51 | FEMALE | G3 | Stage IIB  | T4a | M0 | N0  |
| TCGA-IN-7806 | 1106 | 0 | 50 | MALE   | G3 | Stage IIB  | T3  | M0 | N1  |
| TCGA-CG-4466 | 577  | 0 | 81 | FEMALE | G2 | Stage IB   | T2a | M0 | N0  |
| TCGA-HU-8249 | 881  | 0 | 76 | MALE   | G2 | Stage IIIA | T3  | M0 | N2  |
| TCGA-HU-A4GF | 785  | 0 | 69 | MALE   | G2 | Stage IIA  | T3  | M0 | N0  |
| TCGA-D7-A747 | 255  | 1 | 57 | MALE   | G3 | Stage IIB  | T3  | M0 | N1  |
| TCGA-HU-A4H4 | 725  | 0 | 53 | FEMALE | G3 | Stage IIB  | T2  | M0 | N2  |
| TCGA-CG-4472 | 365  | 0 | 49 | MALE   | G3 | Stage IV   | T4  | M0 | N1  |
| TCGA-VQ-A8PB | 1043 | 1 | 65 | FEMALE | G2 | Stage II   | T3  | M0 | N0  |
| TCGA-R5-A7O7 | 1389 | 0 | 51 | MALE   | G2 | Stage IV   | T3  | M1 | N1  |
| TCGA-BR-8363 | 8    | 1 | 73 | FEMALE | G3 | Stage IB   | T2  | M0 | N0  |
| TCGA-CD-8536 | 378  | 0 | 74 | MALE   | G3 | Stage II   | T3  | M0 | N0  |
| TCGA-BR-7715 | 1023 | 0 | 65 | MALE   | G2 | Stage IIA  | T3  | M0 | N0  |
| TCGA-BR-4361 | 0    | 0 | 66 | FEMALE | G3 | Stage IIIA | T4  | M0 | N0  |
| TCGA-BR-4367 | 0    | 0 | 78 | MALE   | G3 | unknow     | TX  | M0 | N1  |
| TCGA-BR-8483 | 164  | 0 | 59 | MALE   | G2 | Stage IIIA | T3  | M0 | N2  |
| TCGA-CG-4476 | 0    | 0 | 69 | MALE   | G3 | Stage IIIC | T4b | M0 | N3a |
| TCGA-VQ-A91N | 570  | 1 | 59 | FEMALE | G2 | Stage IV   | T4  | M0 | N3  |
| TCGA-BR-4188 | 226  | 1 | 53 | FEMALE | G3 | unknow     | TX  | M0 | N1  |
| TCGA-CG-5726 | 881  | 1 | 73 | MALE   | G2 | Stage IA   | T1  | M0 | N0  |
| TCGA-BR-7704 | 1072 | 0 | 69 | FEMALE | G3 | Stage II   | T3  | M0 | N0  |
| TCGA-D7-8573 | 593  | 0 | 57 | MALE   | G3 | Stage IIA  | T3  | M0 | N0  |
| TCGA-HU-A4HD | 1016 | 0 | 73 | MALE   | G2 | Stage IIIA | T3  | M0 | N2  |
| TCGA-FP-7829 | 594  | 0 | 69 | MALE   | G2 | Stage IIB  | T3  | M0 | N1  |
| TCGA-BR-8680 | 972  | 0 | 45 | MALE   | G2 | Stage IV   | T4b | M1 | N2  |

|              |      |   |        |        |    |            |     |    |     |
|--------------|------|---|--------|--------|----|------------|-----|----|-----|
| TCGA-D7-A6EV | 342  | 0 | 71     | FEMALE | G3 | Stage IIB  | T2  | M0 | N2  |
| TCGA-IN-A6RI | 559  | 0 | 45     | MALE   | G2 | Stage I    | T1b | M0 | N0  |
| TCGA-BR-6706 | 549  | 1 | 63     | MALE   | G3 | Stage IIIA | T3  | M0 | N1  |
| TCGA-HF-7132 | 2351 | 0 | unknow | MALE   | G2 | Stage II   | T2b | M0 | N1  |
| TCGA-BR-8364 | 675  | 0 | 42     | FEMALE | G3 | Stage IIIC | T4b | M0 | N2  |
| TCGA-VQ-A927 | 200  | 1 | 81     | MALE   | G1 | Stage IIIB | T3  | M0 | N3  |
| TCGA-BR-8485 | 280  | 0 | 68     | FEMALE | G3 | Stage IIIC | T4  | M0 | N3a |
| TCGA-VQ-A94T | 342  | 1 | 73     | MALE   | G3 | Stage IIIB | T3  | M0 | N2  |
| TCGA-BR-A4J4 | 16   | 0 | 39     | MALE   | G3 | Stage IIIB | T4a | M0 | N2  |
| TCGA-BR-8284 | 245  | 1 | 72     | FEMALE | G3 | Stage IIIC | T4a | M0 | N3a |
| TCGA-BR-7717 | 552  | 1 | 63     | MALE   | G2 | Stage IV   | T4  | M0 | N1  |
| TCGA-BR-8077 | 21   | 0 | 58     | FEMALE | G2 | Stage IIIB | T4b | M0 | N1  |
| TCGA-BR-6458 | 588  | 1 | 57     | FEMALE | G3 | Stage IIB  | T3  | M0 | N1  |
| TCGA-BR-A4J7 | 989  | 0 | 49     | MALE   | G3 | Stage IIB  | T4a | M0 | NX  |
| TCGA-VQ-AA6G | 792  | 1 | 68     | MALE   | G2 | Stage IIA  | T3  | M0 | N0  |
| TCGA-BR-8060 | 348  | 1 | 75     | FEMALE | G3 | Stage IIB  | T2  | M0 | N2  |
| TCGA-BR-A4J1 | 22   | 1 | 63     | MALE   | G3 | Stage IIIA | T4a | M0 | N1  |
| TCGA-HU-8602 | 679  | 0 | 58     | FEMALE | G3 | Stage IIB  | T4a | M0 | N0  |
| TCGA-CG-5722 | 30   | 0 | 67     | FEMALE | G3 | Stage IV   | T3  | M1 | N2  |
| TCGA-KB-A6F7 | 1935 | 0 | 54     | FEMALE | G3 | Stage IB   | T1  | M0 | N1  |
| TCGA-KB-A6F5 | 169  | 0 | 73     | MALE   | G3 | Stage IIIA | T3  | M0 | N2  |
| TCGA-CG-4300 | 609  | 1 | 79     | MALE   | G2 | Stage IIIB | T3  | M0 | N2  |
| TCGA-HU-A4GY | 8    | 0 | 76     | FEMALE | G3 | Stage IIIA | T4  | M0 | N1  |
| TCGA-BR-A4J9 | 14   | 0 | 55     | MALE   | G3 | Stage IIA  | T3  | M0 | N0  |
| TCGA-HU-A4GQ | 3    | 1 | 71     | MALE   | G2 | Stage IIIC | T4b | M0 | N2  |
| TCGA-IN-A7NU | 356  | 0 | 69     | MALE   | G3 | Stage IIIB | T3  | M0 | N3  |
| TCGA-RD-A7C1 | 507  | 1 | 82     | MALE   | G3 | Stage IB   | T2  | M0 | N0  |
| TCGA-IN-A6RN | 594  | 0 | 72     | FEMALE | G2 | Stage IIA  | T1b | M0 | N2  |
| TCGA-RD-A8MW | 1153 | 1 | 72     | MALE   | G3 | Stage IIIB | T3  | M0 | N2  |
| TCGA-BR-8367 | 801  | 1 | 55     | MALE   | G3 | Stage IIIB | T3  | M0 | N3a |
| TCGA-CD-5799 | 396  | 0 | 45     | MALE   | G3 | Stage II   | T2  | M0 | N1  |
| TCGA-VQ-A8PM | 57   | 1 | 56     | MALE   | G3 | Stage IV   | T4  | M0 | N3  |
| TCGA-VQ-A922 | 275  | 1 | 70     | MALE   | G2 | Stage IV   | T4  | M0 | N1  |
| TCGA-BR-8362 | 398  | 1 | 65     | MALE   | G3 | Stage IIIC | T4b | M0 | N3a |
| TCGA-BR-8370 | 101  | 0 | 64     | MALE   | G3 | Stage IIIB | T3  | M0 | N3a |
| TCGA-BR-6452 | 1055 | 0 | 78     | FEMALE | G3 | Stage IIA  | T3  | M0 | N0  |
| TCGA-HU-A4GJ | 650  | 0 | 60     | FEMALE | G3 | Stage IIIC | T4  | M0 | N3a |
| TCGA-BR-7851 | 378  | 0 | 74     | MALE   | G3 | Stage IIB  | T4a | M0 | N0  |
| TCGA-FP-7735 | 106  | 1 | 77     | MALE   | G2 | Stage IB   | T2  | MX | N0  |
| TCGA-HU-8245 | 552  | 0 | 72     | MALE   | G3 | Stage IIA  | T3  | M0 | N0  |
| TCGA-CD-5801 | 401  | 1 | 69     | MALE   | G3 | Stage IIIA | T3  | M0 | N1  |
| TCGA-CG-5723 | 2496 | 0 | 83     | MALE   | G3 | Stage II   | T2  | M0 | N1  |
| TCGA-BR-A4IZ | 273  | 1 | 45     | FEMALE | G3 | Stage IIIB | T4a | M0 | N2  |
| TCGA-CG-4441 | 426  | 1 | 83     | MALE   | G2 | Stage IIIA | T2  | M0 | N2  |

|              |      |   |        |        |    |            |     |    |     |
|--------------|------|---|--------|--------|----|------------|-----|----|-----|
| TCGA-HU-A4GC | 99   | 0 | 74     | MALE   | G3 | Stage IIIB | T4a | M0 | N2  |
| TCGA-D7-A4YY | 419  | 0 | 61     | MALE   | G3 | Stage IIIB | T3  | M0 | N3a |
| TCGA-D7-A4Z0 | 449  | 0 | 60     | FEMALE | G3 | Stage IIB  | T2  | M0 | N2  |
| TCGA-D7-8570 | 752  | 0 | 44     | MALE   | G3 | Stage IIIB | T3  | M0 | N3a |
| TCGA-VQ-A8PQ | 476  | 1 | 50     | FEMALE | G2 | Stage IV   | T4  | M1 | N1  |
| TCGA-RD-A7BT | 262  | 1 | 66     | MALE   | G3 | Stage IV   | T3  | M0 | N3  |
| TCGA-CD-8535 | 390  | 0 | 59     | MALE   | G3 | Stage IIIA | T3  | M0 | N1  |
| TCGA-VQ-A8PU | 832  | 1 | 72     | FEMALE | G3 | Stage IIIA | T4a | M0 | N1  |
| TCGA-VQ-A8P8 | 942  | 0 | 72     | FEMALE | G2 | Stage IIB  | T4a | M0 | N0  |
| TCGA-HU-A4G3 | 170  | 0 | 54     | MALE   | G2 | Stage IIB  | T2  | M0 | N2  |
| TCGA-BR-8687 | 250  | 1 | 67     | FEMALE | G3 | Stage IIIC | T4b | M0 | N2  |
| TCGA-HF-7133 | 1918 | 0 | unknow | FEMALE | G2 | Stage IV   | T2b | M0 | N3  |
| TCGA-D7-A748 | 132  | 1 | 41     | FEMALE | G3 | Stage IV   | T4a | M1 | N3  |
| TCGA-D7-5579 | 636  | 0 | 74     | MALE   | G3 | Stage IIIA | T3  | M0 | N2  |
| TCGA-BR-6564 | 794  | 1 | 46     | FEMALE | G3 | Stage IIIA | T3  | M0 | N2  |
| TCGA-CG-4304 |      | 0 | 84     | MALE   | G2 | Stage IB   | T2a | M0 | N0  |
| TCGA-VQ-A8E0 | 562  | 1 | 68     | MALE   | G3 | Stage IIIA | T3  | M0 | N2  |
| TCGA-BR-8677 | 813  | 0 | 74     | FEMALE | G3 | Stage IIIB | T3  | M0 | N3a |
| TCGA-CD-5802 | 406  | 0 | 58     | MALE   | G2 | Stage II   | T3  | M0 | N0  |
| TCGA-RD-A8N1 | 3519 | 0 | 70     | MALE   | G3 | Stage IIIB | T3  | M0 | N2  |
| TCGA-HU-A4GP | 273  | 0 | 62     | FEMALE | G2 | Stage IIA  | T2  | M0 | N1  |
| TCGA-VQ-A94R | 1294 | 1 | 63     | MALE   | G2 | unknow     | T4a | M0 | N2  |
| TCGA-BR-8080 | 292  | 1 | 72     | FEMALE | G3 | Stage IIIC | T4  | M0 | N3a |
| TCGA-BR-4369 | 0    | 0 | 75     | MALE   | G3 | unknow     | TX  | M0 | NX  |
| TCGA-BR-A4J2 | 431  | 0 | 70     | MALE   | G3 | Stage IIB  | T4a | M0 | N0  |
| TCGA-BR-A4J5 | 862  | 0 | 56     | MALE   | G3 | Stage IIIA | T4a | M0 | N1  |
| TCGA-CD-8528 | 375  | 0 | 43     | FEMALE | G3 | Stage IIIA | T4  | M0 | N0  |
| TCGA-VQ-A94P | 81   | 1 | 57     | MALE   | GX | unknow     | T4  | MX | NX  |
| TCGA-BR-A4IY | 392  | 0 | 58     | MALE   | G3 | Stage IIB  | T4a | M0 | N0  |
| TCGA-CG-5720 | 30   | 1 | 71     | MALE   | G3 | Stage IB   | T2  | M0 | N0  |
| TCGA-MX-A663 | 300  | 1 | 66     | MALE   | G3 | Stage IIA  | T3  | M0 | N0  |
| TCGA-CG-4442 | 0    | 0 | 85     | MALE   | G3 | Stage IB   | T2  | M0 | N0  |
| TCGA-D7-6528 | 463  | 0 | 70     | FEMALE | G2 | Stage IB   | T2  | M0 | N0  |
| TCGA-VQ-A8E7 | 1138 | 0 | 59     | MALE   | G2 | Stage IV   | T3  | M1 | N1  |
| TCGA-IN-AB1V | 479  | 0 | 63     | MALE   | G2 | Stage IA   | T1b | M0 | N0  |
| TCGA-BR-4255 | 124  | 1 | 76     | FEMALE | G3 | Stage IIIA | T3  | M0 | N1  |
| TCGA-BR-6453 | 485  | 0 | 54     | MALE   | G3 | Stage IIA  | T2  | M0 | N1  |
| TCGA-BR-8295 | 67   | 1 | 60     | FEMALE | G3 | Stage IIB  | T4a | M0 | N0  |
| TCGA-VQ-A91W | 1851 | 0 | 30     | MALE   | G2 | Stage IIIA | T3  | M0 | N1  |
| TCGA-CD-8530 | 377  | 0 | 51     | MALE   | G3 | Stage II   | T3  | M0 | N0  |
| TCGA-CG-4436 | 243  | 0 | 57     | MALE   | G2 | Stage IB   | T2  | M0 | N0  |
| TCGA-HU-8244 | 742  | 0 | 77     | FEMALE | G1 | Stage IA   | T1a | M0 | N0  |
| TCGA-CG-5728 | 579  | 0 | 88     | FEMALE | G3 | Stage IB   | T2  | M0 | N0  |
| TCGA-BR-4187 | 141  | 1 | 56     | MALE   | G3 | unknow     | TX  | M0 | NX  |

|              |      |   |        |        |    |            |     |    |     |
|--------------|------|---|--------|--------|----|------------|-----|----|-----|
| TCGA-D7-6520 | 573  | 0 | 53     | MALE   | G3 | Stage IIIA | T2b | M0 | N2  |
| TCGA-KB-A93H | 1145 | 0 | 79     | FEMALE | G1 | Stage IIB  | T3  | M0 | N1  |
| TCGA-IN-A6RS | 383  | 0 | 76     | MALE   | G2 | Stage IA   | T1b | M0 | N0  |
| TCGA-VQ-AA6B | 1002 | 0 | 48     | MALE   | G2 | Stage IIIB | T3  | M0 | N2  |
| TCGA-VQ-A94U | 819  | 0 | 70     | MALE   | G3 | Stage IIB  | T4a | M0 | N0  |
| TCGA-BR-A452 | 229  | 1 | 57     | MALE   | G3 | Stage IIIA | T4a | M0 | N1  |
| TCGA-VQ-AA6K | 378  | 1 | 59     | MALE   | G3 | Stage IIIC | T4a | M0 | N3a |
| TCGA-VQ-A925 | 138  | 1 | 66     | MALE   | G2 | Stage IIIA | T3  | M0 | N2  |
| TCGA-BR-6852 | 1367 | 0 | 64     | FEMALE | G3 | Stage IIA  | T3  | M0 | N0  |
| TCGA-VQ-A8DZ | 396  | 1 | 70     | MALE   | G3 | Stage IV   | T4  | M1 | N3  |
| TCGA-RD-A8N0 | 1236 | 0 | 53     | FEMALE | G3 | Stage IIIB | T3  | M0 | N2  |
| TCGA-BR-8078 | 900  | 0 | 70     | FEMALE | G3 | Stage IIB  | T4a | M0 | N0  |
| TCGA-CD-5800 | 400  | 0 | 51     | FEMALE | G1 | Stage II   | T3  | M0 | N0  |
| TCGA-CD-8531 | 383  | 0 | 66     | FEMALE | G3 | Stage IIIA | T3  | M0 | N1  |
| TCGA-R5-A804 | 140  | 1 | 54     | MALE   | G3 | Stage IV   | T3  | M1 | N2  |
| TCGA-KB-A93J | 1124 | 0 | 78     | MALE   | G3 | Stage II   | T2b | M0 | N1  |
| TCGA-CG-4306 | 1    | 1 | 90     | MALE   | G3 | Stage IV   | T3  | M1 | N2  |
| TCGA-D7-8572 | 511  | 0 | 57     | MALE   | G2 | Stage IIB  | T2  | M0 | N2  |
| TCGA-CD-8534 | 367  | 0 | 41     | MALE   | G3 | Stage II   | T3  | M0 | N0  |
| TCGA-R5-A7ZF | 259  | 1 | 65     | FEMALE | G2 | Stage IV   | T4a | M1 | N1  |
| TCGA-HF-7134 | 1588 | 0 | unknow | MALE   | G2 | Stage IA   | T1  | M0 | N0  |
| TCGA-D7-5578 | 385  | 0 | 80     | MALE   | G3 | Stage IIIA | T3  | M0 | N2  |
| TCGA-VQ-A8PE | 675  | 1 | 78     | MALE   | G3 | Stage IIIB | T3  | M0 | N3a |
| TCGA-HU-A4GT | 198  | 0 | 71     | FEMALE | G3 | Stage IIA  | T3  | M0 | N0  |
| TCGA-CG-5734 | 243  | 1 | 68     | MALE   | G3 | Stage IIIA | T3  | M0 | N1  |
| TCGA-VQ-A8DT | 1484 | 0 | 43     | MALE   | G3 | Stage IIIB | T3  | M0 | N3a |
| TCGA-FP-7916 | 428  | 1 | 77     | MALE   | G3 | Stage IIIC | T4a | MX | N3a |
| TCGA-CD-A4MG | 200  | 1 | 76     | MALE   | G3 | Stage IIA  | T3  | M0 | N0  |
| TCGA-RD-A8N2 | 3540 | 0 | 59     | FEMALE | G3 | Stage IB   | T2  | M0 | N0  |
| TCGA-BR-A4CQ | 1064 | 0 | 58     | MALE   | G3 | Stage IIIA | T4a | M0 | N1  |
| TCGA-D7-6519 | 625  | 0 | 64     | FEMALE | G3 | unknow     | T2  | M0 | N1  |
| TCGA-CG-5732 | 2100 | 1 | 66     | MALE   | G2 | Stage IV   | T2  | M0 | N3  |
| TCGA-CD-8527 | 218  | 1 | 72     | FEMALE | G2 | Stage II   | T2  | M0 | N1  |
| TCGA-BR-7703 | 1100 | 0 | 81     | MALE   | G2 | Stage IA   | T1b | M0 | N0  |
| TCGA-HF-A5NB | 928  | 0 | 75     | FEMALE | G3 | Stage IIIC | T4a | M0 | N3a |
| TCGA-HU-A4GD | 692  | 0 | 56     | MALE   | G3 | Stage IIB  | T3  | M0 | N1  |
| TCGA-RD-A8N9 | 1083 | 0 | 63     | FEMALE | G3 | Stage II   | T2  | M0 | N1  |
| TCGA-BR-6709 | 370  | 1 | 57     | FEMALE | G3 | Stage IIIB | T3  | M0 | N3a |
| TCGA-D7-6818 | 376  | 1 | 53     | MALE   | G3 | Stage IIIA | T2  | M0 | N3  |
| TCGA-CG-4444 | 1431 | 0 | 76     | MALE   | G3 | Stage IIIA | T2b | M0 | N2  |
| TCGA-BR-8366 | 29   | 0 | 80     | FEMALE | G3 | Stage IIA  | T3  | M0 | N0  |
| TCGA-CD-A4MH | 371  | 0 | 86     | FEMALE | G2 | Stage IIA  | T3  | M0 | N0  |
| TCGA-BR-8683 | 300  | 1 | 75     | MALE   | G3 | Stage IIIB | T4a | M0 | N2  |
| TCGA-BR-8484 | 766  | 1 | 61     | MALE   | G2 | Stage IIIA | T4a | M0 | N1  |

|              |      |   |        |        |    |            |     |    |     |
|--------------|------|---|--------|--------|----|------------|-----|----|-----|
| TCGA-D7-8575 | 554  | 1 | 75     | MALE   | G3 | Stage IIIA | T3  | M0 | N2  |
| TCGA-BR-8679 | 0    | 0 | 63     | FEMALE | G2 | Stage IB   | T2  | M0 | N0  |
| TCGA-BR-8371 | 359  | 1 | 62     | MALE   | G3 | Stage IIIB | T3  | M0 | N3a |
| TCGA-BR-4357 | 0    | 0 | 58     | MALE   | G2 | unknow     | T3  | MX | NX  |
| TCGA-CG-4437 | 245  | 0 | 83     | MALE   | G2 | Stage II   | T2  | M0 | N1  |
| TCGA-BR-A4J8 | 411  | 0 | 71     | FEMALE | G3 | Stage IIIB | T3  | M0 | N3a |
| TCGA-FP-8099 | 519  | 0 | 79     | MALE   | G2 | Stage IIA  | T3  | MX | N0  |
| TCGA-RD-A8MV | 3720 | 0 | 56     | MALE   | G3 | Stage IIIB | T3  | M0 | N2  |
| TCGA-BR-8486 | 0    | 0 | 90     | FEMALE | G2 | Stage IA   | T1b | M0 | N0  |
| TCGA-BR-4253 | 124  | 1 | 80     | FEMALE | G3 | Stage IIIA | T3  | M0 | N1  |
| TCGA-F1-6177 | 0    | 0 | 90     | MALE   | G2 | Stage I    | T1b | MX | N1  |
| TCGA-D7-A6EZ | 618  | 1 | 66     | MALE   | G3 | Stage IIIA | T3  | M0 | N2  |
| TCGA-VQ-A924 | 1686 | 1 | 69     | MALE   | G2 | Stage II   | T3  | M0 | N0  |
| TCGA-BR-7723 | 874  | 1 | 59     | MALE   | G3 | Stage IIIB | T3  | M0 | N3a |
| TCGA-VQ-AA69 | 864  | 0 | 35     | MALE   | G2 | Stage IIIA | T3  | M0 | N2  |
| TCGA-HU-A4H0 | 64   | 0 | 72     | MALE   | G3 | Stage IIIC | T4a | M0 | N3b |
| TCGA-BR-8291 | 607  | 1 | 61     | MALE   | GX | Stage IIB  | T3  | M0 | N1  |
| TCGA-CG-5717 | 212  | 1 | 58     | MALE   | G3 | Stage II   | T2b | M0 | N1  |
| TCGA-HU-A4G9 | 736  | 0 | 67     | FEMALE | G2 | Stage IA   | T1a | M0 | N0  |
| TCGA-HF-7136 |      | 0 | unknow | MALE   | G2 | Stage IIIA | T3  | M0 | N1  |
| TCGA-HJ-7597 | 805  | 1 | 71     | FEMALE | G3 | Stage IB   | T2b | MX | N0  |
| TCGA-CD-5804 | 0    | 0 | 90     | MALE   | G2 | unknow     | T3  | M0 | N1  |
| TCGA-BR-4201 | 940  | 1 | 66     | FEMALE | G1 | unknow     | T2a | M0 | NX  |
| TCGA-BR-6454 | 0    | 0 | 58     | MALE   | G3 | Stage IIA  | T3  | M0 | N0  |
| TCGA-3M-AB46 | 1765 | 0 | 70     | MALE   | G2 | Stage IB   | T2b | MX | N0  |
| TCGA-CD-A48C | 353  | 1 | 79     | FEMALE | G3 | Stage IIB  | T3  | M0 | N1  |
| TCGA-D7-6820 | 344  | 0 | 64     | MALE   | G2 | Stage IIB  | T2  | M0 | N1  |
| TCGA-BR-A44U | 422  | 1 | 70     | MALE   | G3 | Stage IIIB | T3  | M0 | N3a |
| TCGA-BR-7196 | 666  | 0 | 64     | MALE   | G3 | Stage IV   | T3  | M1 | N3a |
| TCGA-FP-8210 | 153  | 1 | 48     | MALE   | G3 | Stage IIIA | T3  | M0 | N1  |
| TCGA-BR-8690 | 325  | 0 | 54     | FEMALE | G2 | Stage IIIB | T3  | M0 | N3a |
| TCGA-BR-8368 | 131  | 0 | 84     | FEMALE | G3 | Stage IB   | T2  | M0 | N0  |
| TCGA-CG-5716 | 0    | 0 | 86     | MALE   | G2 | Stage IV   | T4a | M1 | N2  |
| TCGA-BR-8081 | 981  | 0 | 71     | FEMALE | G2 | Stage IIB  | T4a | M0 | N0  |
| TCGA-HU-A4GN | 912  | 0 | 61     | MALE   | G2 | Stage IIA  | T2  | M0 | N1  |
| TCGA-CD-A489 | 344  | 1 | 58     | MALE   | G3 | Stage IIA  | T3  | M0 | N0  |
| TCGA-RD-A8N6 | 272  | 1 | 78     | FEMALE | G3 | Stage IIIA | T2  | M0 | N2  |
| TCGA-BR-8289 | 81   | 1 | 57     | MALE   | G3 | Stage IV   | T4  | M1 | N3a |
| TCGA-RD-A8NB | 513  | 1 | 80     | FEMALE | G3 | Stage IIIA | T3  | M0 | N1  |
| TCGA-VQ-A8PJ | 82   | 1 | 53     | MALE   | GX | Stage IV   | T4  | M1 | N2  |
| TCGA-D7-6526 | 523  | 0 | 67     | FEMALE | G2 | Stage IIIA | T3  | M0 | N2  |
| TCGA-CG-5721 | 183  | 0 | 58     | MALE   | G3 | Stage IV   | T4  | M0 | N1  |
| TCGA-BR-6710 | 273  | 0 | 41     | MALE   | G2 | Stage IB   | T2  | M0 | N0  |
| TCGA-EQ-5647 | 19   | 1 | 86     | FEMALE | G2 | Stage IV   | T4  | M1 | N3  |

|              |      |   |    |        |    |            |     |    |     |
|--------------|------|---|----|--------|----|------------|-----|----|-----|
| TCGA-B7-A5TI | 595  | 0 | 52 | MALE   | G3 | Stage IIIC | T4  | M0 | N3  |
| TCGA-FP-8209 | 1811 | 1 | 49 | MALE   | G3 | Stage IB   | T2a | M0 | N0  |
| TCGA-RD-A7BW | 156  | 1 | 68 | FEMALE | G3 | Stage IB   | T2  | M0 | N0  |
| TCGA-R5-A7ZI | 2267 | 0 | 44 | FEMALE | G3 | Stage IV   | T4  | M1 | N1  |
| TCGA-BR-4280 | 201  | 1 | 78 | FEMALE | G2 | Stage III  | T2b | M0 | N1  |
| TCGA-HU-A4H2 | 394  | 0 | 58 | FEMALE | G2 | Stage IIIB | T3  | M0 | N3b |
| TCGA-HU-A4G6 | 738  | 0 | 74 | MALE   | G3 | Stage IA   | T1b | M0 | N0  |
| TCGA-IN-A6RO |      | 1 | 70 | MALE   | G2 | Stage IA   | T1b | M0 | N0  |
| TCGA-CD-A48A | 378  | 0 | 57 | MALE   | G2 | Stage IIA  | T3  | M0 | N0  |
| TCGA-CD-8526 | 381  | 0 | 73 | FEMALE | G3 | Stage IIIA | T3  | M0 | N1  |
| TCGA-FP-8211 | 413  | 0 | 62 | MALE   | G2 | Stage IIB  | T3  | MX | N1  |
| TCGA-BR-8369 | 427  | 0 | 76 | FEMALE | G3 | Stage IIIB | T3  | M0 | N3a |
| TCGA-ZA-A8F6 | 525  | 0 | 71 | MALE   | G2 | Stage IB   | T2  | MX | N0  |
| TCGA-CD-5813 | 377  | 1 | 60 | MALE   | G3 | Stage II   | T3  | M0 | N0  |
| TCGA-EQ-8122 | 243  | 1 | 71 | FEMALE | G3 | Stage IIB  | T3  | MX | N1  |
| TCGA-BR-4292 | 0    | 0 | 73 | FEMALE | G1 | unknow     | T1  | M0 | NX  |
| TCGA-R5-A805 | 281  | 1 | 71 | MALE   | G3 | Stage IIIB | T3  | M0 | N2  |
| TCGA-VQ-A91A | 1200 | 0 | 67 | MALE   | G1 | Stage IIIB | T3  | M0 | N3a |
| TCGA-VQ-A91Q | 633  | 1 | 61 | MALE   | G3 | Stage IV   | T3  | M0 | N3  |
| TCGA-BR-A4QM | 156  | 0 | 65 | MALE   | G3 | Stage IIIA | T3  | M0 | N2  |
| TCGA-FP-A8CX | 7    | 0 | 60 | MALE   | G3 | Stage IIIC | T4b | MX | N3a |
| TCGA-BR-8487 | 34   | 0 | 64 | FEMALE | G3 | Stage IIA  | T3  | M0 | N0  |
| TCGA-HU-A4G2 | 739  | 0 | 45 | MALE   | G3 | Stage IIB  | T3  | M0 | N1  |
| TCGA-IN-A6RL | 406  | 1 | 84 | MALE   | G2 | unknow     | T2  | M0 | N1  |
| TCGA-BR-7959 | 1010 | 0 | 59 | MALE   | G3 | Stage IIIA | T4a | M0 | N1  |
| TCGA-D7-8578 | 643  | 0 | 72 | MALE   | G2 | Stage IB   | T2  | M0 | N0  |
| TCGA-CG-5724 | 366  | 1 | 59 | MALE   | G3 | Stage IV   | T3  | M1 | N3  |
| TCGA-F1-A448 | 647  | 0 | 70 | MALE   | G3 | Stage IIIB | T3  | M0 | N3b |
| TCGA-BR-6456 | 526  | 1 | 74 | FEMALE | G2 | Stage IIB  | T3  | M0 | N1  |
| TCGA-CG-4462 | 0    | 1 | 72 | FEMALE | G3 | Stage IV   | T3  | M1 | N3  |
| TCGA-VQ-AA6F | 1646 | 0 | 57 | MALE   | G2 | Stage IIB  | T3  | M0 | N1  |
| TCGA-VQ-A8PY | 436  | 1 | 47 | FEMALE | G2 | Stage IIIB | T3  | M0 | N2  |
| TCGA-VQ-A91U | 52   | 1 | 78 | MALE   | G2 | Stage IIIA | T3  | M0 | N1  |
| TCGA-D7-5577 | 782  | 1 | 53 | FEMALE | G2 | Stage IIIA | T2  | M0 | N3  |
| TCGA-BR-8678 | 754  | 0 | 76 | MALE   | G2 | Stage IB   | T2  | M0 | N0  |
| TCGA-D7-6822 | 375  | 0 | 77 | MALE   | G2 | Stage IB   | T2  | M0 | N0  |
| TCGA-BR-A4CS | 45   | 1 | 77 | MALE   | G3 | Stage IIIC | T4b | M0 | N3a |
| TCGA-BR-8588 | 389  | 0 | 55 | FEMALE | G3 | Stage IIB  | T4a | M0 | N0  |
| TCGA-VQ-A8PD | 496  | 1 | 69 | MALE   | G2 | Stage IIIC | T4a | M0 | N3  |
| TCGA-FP-A4BE | 337  | 0 | 55 | MALE   | G3 | Stage IIA  | T3  | M0 | N0  |
| TCGA-D7-A6F2 | 476  | 0 | 62 | MALE   | G3 | Stage IB   | T2  | M0 | N0  |
| TCGA-VQ-A8DL | 28   | 1 | 69 | FEMALE | G2 | Stage IIA  | T3  | M0 | N0  |
| TCGA-HU-A4H6 | 644  | 0 | 72 | FEMALE | G2 | Stage IIIA | T3  | M0 | N2  |
| TCGA-BR-4191 | 558  | 1 | 72 | MALE   | G2 | unknow     | TX  | M0 | N1  |



|              |      |   |    |        |    |            |     |    |        |
|--------------|------|---|----|--------|----|------------|-----|----|--------|
| TCGA-BR-A4J6 | 20   | 0 | 69 | FEMALE | G2 | Stage IIA  | T3  | M0 | N0     |
| TCGA-IN-8663 | 103  | 1 | 68 | MALE   | G3 | Stage IIB  | T2  | M0 | N2     |
| TCGA-VQ-A92D | 2032 | 0 | 67 | MALE   | G2 | Stage IB   | T2b | M0 | N0     |
| TCGA-FP-8631 | 17   | 0 | 68 | MALE   | G2 | Stage IIIA | T3  | MX | N2     |
| TCGA-IN-7808 | 105  | 1 | 59 | MALE   | G3 | unknow     | T3  | M1 | N3     |
| TCGA-HU-A4H5 | 724  | 0 | 71 | MALE   | GX | Stage IB   | T2  | M0 | N0     |
| TCGA-D7-A4YT | 434  | 0 | 56 | MALE   | G2 | Stage IIIA | T2  | M0 | N3a    |
| TCGA-SW-A7EB | 176  | 0 | 45 | MALE   | G2 | Stage IIIA | T3  | M0 | N2     |
| TCGA-D7-8579 | 636  | 0 | 66 | FEMALE | G2 | Stage IIB  | T2  | M0 | N2     |
| TCGA-D7-A4YU | 500  | 0 | 73 | MALE   | G3 | Stage IIIB | T3  | M0 | N3a    |
| TCGA-CD-A4MJ | 384  | 0 | 60 | MALE   | G2 | Stage IB   | T2  | M0 | N0     |
| TCGA-IN-A6RR | 205  | 1 | 84 | MALE   | G3 | unknow     | T3  | M0 | N1     |
| TCGA-VQ-A91X | 289  | 1 | 74 | MALE   | G3 | Stage IIIB | T3  | M0 | N2     |
| TCGA-VQ-A8P5 | 235  | 1 | 67 | MALE   | G3 | Stage IIA  | T3  | M0 | N0     |
| TCGA-BR-6566 | 997  | 0 | 64 | FEMALE | G3 | Stage IIA  | T3  | M0 | N0     |
| TCGA-BR-8372 | 951  | 0 | 63 | MALE   | G3 | Stage IIIC | T4b | M0 | N3a    |
| TCGA-F1-A72C | 346  | 0 | 68 | MALE   | G2 | Stage IIA  | T3  | M0 | N0     |
| TCGA-CG-5719 | 31   | 0 | 54 | FEMALE | G1 | Stage IV   | T4  | M1 | N0     |
| TCGA-BR-A4QI | 652  | 1 | 70 | FEMALE | G3 | Stage IIA  | T3  | M0 | N0     |
| TCGA-BR-8590 | 284  | 1 | 62 | MALE   | G3 | Stage IIIC | T4b | M0 | N2     |
| TCGA-CG-4440 | 122  | 1 | 68 | FEMALE | G3 | Stage IV   | T3  | M1 | N3     |
| TCGA-BR-A4IU | 838  | 0 | 34 | FEMALE | G3 | Stage IIIA | T4a | M0 | N1     |
| TCGA-VQ-A8E2 | 1319 | 0 | 57 | MALE   | G2 | Stage IIIB | T3  | M0 | N2     |
| TCGA-VQ-AA6A | 1184 | 0 | 56 | MALE   | G2 | Stage IIIC | T4  | M0 | N3a    |
| TCGA-BR-6705 | 779  | 1 | 68 | FEMALE | G3 | Stage IIIB | T3  | M0 | N3a    |
| TCGA-BR-8059 | 439  | 1 | 72 | MALE   | G3 | Stage III  | T4  | M0 | N1     |
| TCGA-CD-8532 | 354  | 1 | 52 | MALE   | G2 | Stage II   | T3  | M0 | N0     |
| TCGA-BR-7707 | 1090 | 0 | 69 | FEMALE | G3 | Stage IB   | T2  | M0 | N0     |
| TCGA-VQ-A8PT | 900  | 0 | 65 | MALE   | G3 | Stage IIIB | T4b | M0 | N0     |
| TCGA-BR-A4CR | 0    | 0 | 70 | FEMALE | G3 | Stage IIIC | T4b | M0 | N3a    |
| TCGA-HU-8243 | 180  | 1 | 66 | MALE   | G2 | Stage IIIC | T4a | M0 | N3b    |
| TCGA-CG-5733 | 641  | 1 | 83 | FEMALE | G3 | Stage IIIA | T2  | M0 | N2     |
| TCGA-D7-8576 | 446  | 1 | 54 | FEMALE | G3 | Stage IIIB | T3  | M0 | N3a    |
| TCGA-VQ-A8E3 | 661  | 1 | 79 | MALE   | G3 | Stage IIA  | T3  | M0 | N0     |
| TCGA-BR-A4IV | 869  | 1 | 47 | MALE   | G3 | Stage IIIB | T4a | M0 | N2     |
| TCGA-D7-6815 | 486  | 0 | 70 | FEMALE | G2 | Stage IIB  | T2  | M0 | N2     |
| TCGA-VQ-A91K | 1862 | 0 | 69 | MALE   | G2 | Stage IIIA | T3  | M0 | N1     |
| TCGA-VQ-A8PX | 1964 | 0 | 51 | MALE   | G2 | Stage IA   | T1  | M0 | N0     |
| TCGA-BR-A453 | 185  | 1 | 51 | MALE   | G3 | Stage IV   | T4a | M1 | N3a    |
| TCGA-BR-8365 | 533  | 1 | 70 | FEMALE | G3 | Stage IIA  | T3  | M0 | N0     |
| TCGA-HU-8238 | 46   | 0 | 56 | MALE   | G2 | unknow     | T3  | M0 | unknow |
| TCGA-BR-8589 | 825  | 0 | 56 | MALE   | G3 | Stage IIIB | T4b | M0 | N1     |
| TCGA-BR-4183 | 201  | 1 | 55 | FEMALE | G3 | Stage IIIA | T3  | M0 | N1     |
| TCGA-BR-7722 | 466  | 1 | 62 | MALE   | G3 | Stage IIB  | T3  | M0 | N1     |

|              |      |   |        |        |    |            |     |    |     |
|--------------|------|---|--------|--------|----|------------|-----|----|-----|
| TCGA-B7-A5TN | 287  | 0 | 60     | MALE   | G2 | Stage IIB  | T4a | M0 | NX  |
| TCGA-BR-6457 | 416  | 0 | 69     | MALE   | G3 | Stage IIA  | T3  | M0 | N0  |
| TCGA-BR-4257 | 294  | 1 | 79     | FEMALE | G2 | unknow     | TX  | M0 | NX  |
| TCGA-BR-8360 | 188  | 0 | 66     | MALE   | G2 | Stage IIA  | T3  | M0 | N0  |
| TCGA-KB-A93G | 613  | 0 | 68     | MALE   | G1 | Stage IB   | T2  | M0 | N0  |
| TCGA-IN-A7NR | 198  | 0 | 64     | FEMALE | G3 | Stage IV   | T3  | M1 | N3  |
| TCGA-BR-7716 | 1210 | 0 | 62     | FEMALE | G2 | Stage IIB  | T3  | M0 | N1  |
| TCGA-HF-7131 |      | 0 | unknow | FEMALE | G2 | Stage IB   | T2b | MX | N0  |
| TCGA-EQ-A4SO | 494  | 0 | 70     | MALE   | G2 | Stage IIIB | T4b | MX | N1  |
| TCGA-D7-A6ET | 804  | 0 | 76     | MALE   | G2 | Stage IIIB | T3  | M0 | N3a |
| TCGA-HU-8604 | 694  | 0 | 82     | FEMALE | G2 | Stage IIA  | T3  | M0 | N0  |
| TCGA-VQ-A8P2 | 1160 | 0 | 68     | MALE   | G2 | Stage IIIA | T4a | M0 | N1  |
| TCGA-VQ-A94O | 640  | 1 | 74     | MALE   | G2 | Stage IIIC | T4a | M0 | N3  |
| TCGA-HU-A4GX | 616  | 0 | 70     | FEMALE | G3 | Stage IIIC | T4b | M0 | N2  |
| TCGA-VQ-A8P3 | 1132 | 0 | 72     | MALE   | G2 | Stage IIIA | T4  | M0 | N1  |
| TCGA-B7-5818 | 356  | 0 | 62     | MALE   | G3 | Stage IB   | T2  | M0 | N0  |
| TCGA-BR-4362 | 0    | 0 | 74     | FEMALE | G3 | unknow     | TX  | M0 | N1  |
| TCGA-IP-7968 | 77   | 0 | 74     | MALE   | G2 | Stage IIIB | T3  | MX | N2  |
| TCGA-3M-AB47 |      | 1 | 51     | MALE   | G3 | Stage IIIB | T3  | MX | N2  |
| TCGA-VQ-A8PO | 282  | 1 | 74     | MALE   | G3 | Stage IIB  | T4a | M0 | N0  |
| TCGA-BR-8682 | 991  | 0 | 52     | MALE   | G3 | Stage IIB  | T4a | M0 | N0  |
| TCGA-ZQ-A9CR | 24   | 1 | 79     | FEMALE | G3 | Stage IIIC | T4a | MX | N3  |
| TCGA-VQ-A8PZ | 2233 | 0 | 56     | FEMALE | G3 | Stage II   | T3  | M0 | N0  |
| TCGA-BR-7958 | 899  | 0 | 60     | MALE   | G3 | Stage IIIB | T4b | M0 | N0  |
| TCGA-BR-A44T | 1038 | 0 | 53     | FEMALE | G3 | Stage IIA  | T3  | M0 | N0  |
| TCGA-BR-6565 | 279  | 1 | 67     | MALE   | G2 | Stage IIB  | T4a | M0 | N0  |
| TCGA-F1-6875 | 2197 | 1 | 79     | MALE   | G2 | Stage IA   | T2  | M0 | N0  |
| TCGA-VQ-AA6I | 491  | 1 | 68     | MALE   | G3 | Stage IIIB | T3  | M0 | N3  |
| TCGA-VQ-A8DV | 403  | 1 | 48     | MALE   | G2 | Stage IB   | T2  | M0 | N0  |
| TCGA-VQ-A8PC | 1407 | 1 | 65     | MALE   | G3 | Stage IIIA | T3  | M0 | N1  |
| TCGA-BR-4294 | 0    | 0 | 65     | MALE   | G2 | unknow     | T2a | M0 | NX  |
| TCGA-HU-A4HB | 477  | 1 | 68     | MALE   | G3 | Stage IIB  | T2  | M0 | N2  |
| TCGA-BR-8297 | 225  | 0 | 58     | MALE   | GX | Stage IIIC | T4b | M0 | N3a |
| TCGA-CD-A487 | 374  | 0 | 51     | MALE   | G3 | Stage IIB  | T3  | M0 | N1  |
| TCGA-CD-8525 | 383  | 0 | 82     | FEMALE | G3 | Stage IIIA | T3  | M0 | N1  |
| TCGA-HU-8608 | 641  | 0 | 70     | MALE   | G3 | Stage IIIB | T4a | M0 | N2  |
| TCGA-D7-A4YX | 1108 | 0 | 63     | MALE   | G3 | Stage IIB  | T3  | M0 | N1  |
| TCGA-D7-6521 | 564  | 0 | 65     | MALE   | G3 | unknow     | T2b | M0 | N2  |
| TCGA-VQ-A91Y | 296  | 1 | 67     | MALE   | G3 | Stage IIIC | T4a | M0 | N3b |
| TCGA-FP-7998 | 678  | 0 | 77     | MALE   | G3 | Stage IIIC | T4a | MX | N3a |
| TCGA-BR-6803 | 949  | 0 | 54     | FEMALE | G3 | Stage IIA  | T3  | M0 | N0  |
| TCGA-BR-7901 | 105  | 1 | 74     | MALE   | G2 | Stage IIB  | T3  | M0 | N1  |
| TCGA-BR-4279 | 291  | 1 | 43     | MALE   | G3 | Stage II   | T2a | M0 | N1  |
| TCGA-HU-A4G8 | 690  | 0 | 71     | FEMALE | G3 | Stage IIB  | T3  | M0 | N1  |

|              |     |   |    |        |    |            |     |    |     |
|--------------|-----|---|----|--------|----|------------|-----|----|-----|
| TCGA-BR-7957 | 276 | 1 | 50 | FEMALE | GX | Stage IV   | T3  | M1 | N3a |
| TCGA-R5-A7ZE | 554 | 1 | 66 | FEMALE | G2 | Stage IIIA | T3  | M0 | N2  |
| TCGA-VQ-AA6J | 838 | 0 | 75 | MALE   | G3 | Stage IIIB | T4a | M0 | N2  |
| TCGA-CG-4305 | 485 | 0 | 69 | MALE   | G3 | Stage II   | T2a | M0 | N1  |
| TCGA-IN-A7NT | 323 | 0 | 73 | FEMALE | G3 | Stage IIB  | T3  | M0 | N1  |
| TCGA-MX-A5UJ | 600 | 0 | 86 | FEMALE | G3 | Stage IIIA | T3  | M0 | N2  |
| TCGA-VQ-A8PF | 76  | 1 | 76 | MALE   | G3 | Stage IIIB | T3  | M0 | N3b |

**Table S2:** The co-expression results of autophagy-related genes and autophagy-related lncRNAs.

| autoGene | lncRNA      | cor          | pvalue   | Regulation |
|----------|-------------|--------------|----------|------------|
| ATG16L2  | Z83843.1    | 0.504179366  | 1.43E-25 | postive    |
| ATG2B    | Z83843.1    | 0.420170843  | 1.80E-17 | postive    |
| GAPDH    | Z83843.1    | -0.477865755 | 8.63E-23 | negative   |
| MLST8    | Z83843.1    | -0.452449596 | 2.53E-20 | negative   |
| P4HB     | Z83843.1    | -0.42763671  | 4.18E-18 | negative   |
| CXCR4    | AC133644.1  | 0.458576671  | 6.72E-21 | postive    |
| ATG16L2  | AC004918.3  | 0.453981791  | 1.82E-20 | postive    |
| ATG2B    | AC004918.3  | 0.570405225  | 9.53E-34 | postive    |
| BIRC6    | AC004918.3  | 0.43751644   | 5.76E-19 | postive    |
| TSC1     | AC004918.3  | 0.412398496  | 7.87E-17 | postive    |
| DNAJB1   | AC083809.1  | 0.411176702  | 9.89E-17 | postive    |
| GOPC     | ANKRD10-IT1 | 0.42012391   | 1.81E-17 | postive    |
| MAP2K7   | AL161421.1  | 0.411062971  | 1.01E-16 | postive    |
| MAPK8IP1 | AL161421.1  | 0.466388216  | 1.19E-21 | postive    |
| ATG16L2  | AC087749.1  | 0.400205987  | 7.41E-16 | postive    |
| SERPINA1 | LINC01996   | 0.452120207  | 2.72E-20 | postive    |
| ERBB2    | AC073508.3  | 0.41573763   | 4.19E-17 | postive    |
| ATG16L2  | AC092436.2  | 0.556307431  | 7.49E-32 | postive    |
| CXCR4    | AC092436.2  | 0.408038496  | 1.77E-16 | postive    |
| CAPN10   | AC005391.1  | 0.422498216  | 1.14E-17 | postive    |
| ATG16L2  | AL031282.2  | 0.44860857   | 5.74E-20 | postive    |
| BIRC5    | AL928654.1  | 0.40977081   | 1.29E-16 | postive    |
| HSPA8    | AL162274.2  | -0.46927235  | 6.22E-22 | negative   |
| P4HB     | AC007619.1  | -0.415664964 | 4.25E-17 | negative   |
| ATG16L2  | AL022328.3  | 0.58989169   | 1.60E-36 | postive    |
| IKBKB    | AL022328.3  | 0.499083623  | 5.15E-25 | postive    |
| TSC1     | AL022328.3  | 0.416355438  | 3.73E-17 | postive    |
| HSPA8    | AC006480.2  | -0.408477276 | 1.64E-16 | negative   |
| ATG16L2  | AC005387.1  | 0.401996368  | 5.36E-16 | postive    |
| BECN1    | AP003392.3  | -0.412798396 | 7.30E-17 | negative   |
| ITPR1    | LINC01082   | 0.438851255  | 4.38E-19 | postive    |
| NKX2-3   | LINC01082   | 0.405016867  | 3.09E-16 | postive    |
| ATG16L2  | AC073575.2  | 0.407585394  | 1.93E-16 | postive    |
| TSC1     | AC073575.2  | 0.432007229  | 1.75E-18 | postive    |
| ATG16L2  | AC109587.1  | 0.407187344  | 2.08E-16 | postive    |
| BAK1     | AC109587.1  | -0.429220973 | 3.06E-18 | negative   |
| GAPDH    | AC109587.1  | -0.446356937 | 9.23E-20 | negative   |
| MLST8    | AC109587.1  | -0.427393985 | 4.39E-18 | negative   |
| P4HB     | AC109587.1  | -0.491668226 | 3.21E-24 | negative   |

|         |            |              |           |          |
|---------|------------|--------------|-----------|----------|
| ULK2    | AC109587.1 | 0.401566278  | 5.80E-16  | postive  |
| ATG16L2 | AL365361.1 | 0.487319807  | 9.21E-24  | postive  |
| BCL2    | AL365361.1 | 0.65868187   | 5.20E-48  | postive  |
| CCR2    | AL365361.1 | 0.617450419  | 8.74E-41  | postive  |
| CFLAR   | AL365361.1 | 0.51976107   | 2.45E-27  | postive  |
| CXCR4   | AL365361.1 | 0.625851694  | 3.60E-42  | postive  |
| ITPR1   | AL365361.1 | 0.4746711    | 1.81E-22  | postive  |
| MAP1LC3 | AL365361.1 | 0.439392404  | 3.92E-19  | postive  |
| PRKCQ   | AL365361.1 | 0.403677092  | 3.95E-16  | postive  |
| DLC1    | PART1      | 0.523997178  | 7.84E-28  | postive  |
| GABARAP | PART1      | 0.419825245  | 1.92E-17  | postive  |
| HSPB8   | PART1      | 0.864031695  | 3.20E-113 | postive  |
| ITPR1   | PART1      | 0.474664743  | 1.81E-22  | postive  |
| NRG2    | PART1      | 0.438112937  | 5.10E-19  | postive  |
| ULK2    | PART1      | 0.418094769  | 2.67E-17  | postive  |
| CDKN2A  | LINC01273  | 0.406328752  | 2.43E-16  | postive  |
| DLC1    | SPINT1-AS1 | -0.420430478 | 1.71E-17  | negative |
| ITPR1   | SPINT1-AS1 | -0.456627773 | 1.03E-20  | negative |
| HSPA8   | AC015849.4 | -0.420546833 | 1.67E-17  | negative |
| ATG16L2 | AC116914.2 | 0.440413979  | 3.18E-19  | postive  |
| ATG16L2 | AC018607.1 | 0.477796806  | 8.77E-23  | postive  |
| CFLAR   | AC018607.1 | 0.416207716  | 3.83E-17  | postive  |
| CXCR4   | AC018607.1 | 0.419212699  | 2.16E-17  | postive  |
| BCL2    | AC018529.1 | 0.427061392  | 4.69E-18  | postive  |
| ARSB    | AL357054.4 | 0.43451583   | 1.06E-18  | postive  |
| BCL2    | AL357054.4 | 0.486510164  | 1.12E-23  | postive  |
| DLC1    | AL357054.4 | 0.576254719  | 1.46E-34  | postive  |
| HSPA5   | AL357054.4 | -0.403167219 | 4.33E-16  | negative |
| HSPB8   | AL357054.4 | 0.736415236  | 2.78E-65  | postive  |
| ITPR1   | AL357054.4 | 0.590336915  | 1.37E-36  | postive  |
| NRG2    | AL357054.4 | 0.428584904  | 3.47E-18  | postive  |
| PEA15   | AL357054.4 | 0.432622405  | 1.55E-18  | postive  |
| ULK2    | AL357054.4 | 0.43945413   | 3.87E-19  | postive  |
| HSPB8   | AL023803.2 | 0.608621493  | 2.25E-39  | postive  |
| CXCR4   | AL133342.1 | 0.408126896  | 1.74E-16  | postive  |
| MAP1LC3 | LINC01635  | 0.481673256  | 3.53E-23  | postive  |
| BCL2L1  | ABALON     | 0.573853368  | 3.17E-34  | postive  |
| RGS19   | ERICD      | 0.481658928  | 3.55E-23  | postive  |
| ATG16L2 | AC025287.3 | 0.559880981  | 2.53E-32  | postive  |
| ATG2B   | AC025287.3 | 0.478333832  | 7.74E-23  | postive  |
| BIRC6   | AC025287.3 | 0.411330774  | 9.61E-17  | postive  |
| CFLAR   | AC025287.3 | 0.400204861  | 7.41E-16  | postive  |
| IKBKB   | AC025287.3 | 0.425803133  | 6.00E-18  | postive  |
| TSC1    | AC025287.3 | 0.452439813  | 2.54E-20  | postive  |

|         |            |              |           |          |
|---------|------------|--------------|-----------|----------|
| CXCR4   | PSMB8-AS1  | 0.406381098  | 2.41E-16  | postive  |
| DAPK2   | AC015914.1 | 0.693329616  | 4.99E-55  | postive  |
| MAP1LC3 | AC091180.5 | 0.40844213   | 1.65E-16  | postive  |
| RHEB    | MXN1-AS1   | 0.406932341  | 2.18E-16  | postive  |
| ATG16L2 | AP000766.1 | 0.442386715  | 2.11E-19  | postive  |
| BAK1    | AP000766.1 | -0.415336755 | 4.52E-17  | negative |
| BCL2    | AP000766.1 | 0.450828727  | 3.58E-20  | postive  |
| GAPDH   | AP000766.1 | -0.401432251 | 5.94E-16  | negative |
| P4HB    | AP000766.1 | -0.45227225  | 2.63E-20  | negative |
| UVRAG   | AP000766.1 | 0.426923166  | 4.82E-18  | postive  |
| MAPK1   | AC000068.1 | 0.419294264  | 2.12E-17  | postive  |
| ARSB    | RAP2C-AS1  | 0.497891426  | 6.94E-25  | postive  |
| ATIC    | RAP2C-AS1  | -0.40963423  | 1.32E-16  | negative |
| BCL2    | RAP2C-AS1  | 0.514992838  | 8.70E-27  | postive  |
| DLC1    | RAP2C-AS1  | 0.633541881  | 1.79E-43  | postive  |
| GABARAP | RAP2C-AS1  | 0.464546357  | 1.80E-21  | postive  |
| HSPB8   | RAP2C-AS1  | 0.725081354  | 2.14E-62  | postive  |
| ITGB1   | RAP2C-AS1  | 0.433278752  | 1.36E-18  | postive  |
| ITPR1   | RAP2C-AS1  | 0.676202591  | 1.94E-51  | postive  |
| NRG2    | RAP2C-AS1  | 0.490735715  | 4.03E-24  | postive  |
| PEA15   | RAP2C-AS1  | 0.415410001  | 4.46E-17  | postive  |
| PINK1   | RAP2C-AS1  | 0.403863135  | 3.82E-16  | postive  |
| ULK2    | RAP2C-AS1  | 0.559578952  | 2.77E-32  | postive  |
| ATG16L2 | AC021739.3 | 0.402874067  | 4.57E-16  | postive  |
| CFLAR   | AC021739.3 | 0.40152866   | 5.84E-16  | postive  |
| DAPK1   | DIP2C-AS1  | 0.41091101   | 1.04E-16  | postive  |
| MAP1LC3 | AC008115.4 | 0.452593268  | 2.46E-20  | postive  |
| DLC1    | AP001107.5 | 0.655308587  | 2.24E-47  | postive  |
| GABARAP | AP001107.5 | 0.488543127  | 6.86E-24  | postive  |
| HDAC1   | AP001107.5 | -0.411797969 | 8.81E-17  | negative |
| HSPA5   | AP001107.5 | -0.406041711 | 2.56E-16  | negative |
| HSPB8   | AP001107.5 | 0.906860875  | 4.79E-142 | postive  |
| ITPR1   | AP001107.5 | 0.605763146  | 6.31E-39  | postive  |
| NRG2    | AP001107.5 | 0.503415583  | 1.73E-25  | postive  |
| PEA15   | AP001107.5 | 0.472731648  | 2.83E-22  | postive  |
| ULK2    | AP001107.5 | 0.514557067  | 9.76E-27  | postive  |
| ATG16L2 | AC005674.1 | 0.553459391  | 1.76E-31  | postive  |
| CFLAR   | AC005674.1 | 0.410136254  | 1.20E-16  | postive  |
| IKBKB   | AC005674.1 | 0.458799918  | 6.40E-21  | postive  |
| TSC1    | AC005674.1 | 0.40684197   | 2.21E-16  | postive  |
| ARSB    | Z99289.1   | 0.412606003  | 7.57E-17  | postive  |
| ATIC    | Z99289.1   | -0.406247226 | 2.47E-16  | negative |
| BCL2    | Z99289.1   | 0.435245626  | 9.14E-19  | postive  |
| BIRC5   | Z99289.1   | -0.423400001 | 9.60E-18  | negative |

|         |            |              |          |          |
|---------|------------|--------------|----------|----------|
| DLC1    | Z99289.1   | 0.635301212  | 8.87E-44 | postive  |
| GAPDH   | Z99289.1   | -0.41334331  | 6.59E-17 | negative |
| HDAC1   | Z99289.1   | -0.402207766 | 5.16E-16 | negative |
| HSPB8   | Z99289.1   | 0.580436254  | 3.75E-35 | postive  |
| ITGB1   | Z99289.1   | 0.454067413  | 1.79E-20 | postive  |
| ITPR1   | Z99289.1   | 0.59628043   | 1.79E-37 | postive  |
| P4HB    | Z99289.1   | -0.433584208 | 1.28E-18 | negative |
| ULK2    | Z99289.1   | 0.487319371  | 9.21E-24 | postive  |
| WIPI2   | RNF216P1   | 0.606375733  | 5.06E-39 | postive  |
| LAMP1   | AL356740.1 | 0.42089417   | 1.56E-17 | postive  |
| CCR2    | LINC02528  | 0.477045273  | 1.04E-22 | postive  |
| CX3CL1  | LINC02528  | 0.466432441  | 1.18E-21 | postive  |
| IFNG    | LINC02528  | 0.634484451  | 1.23E-43 | postive  |
| NLRC4   | LINC02528  | 0.53944711   | 1.06E-29 | postive  |
| TNFSF10 | LINC02528  | 0.422694597  | 1.10E-17 | postive  |
| FOXO3   | AL390208.1 | 0.478098682  | 8.17E-23 | postive  |
| PINK1   | AC079907.1 | -0.451753113 | 2.94E-20 | negative |
| ARSB    | AC090559.1 | 0.536398122  | 2.53E-29 | postive  |
| BCL2    | AC090559.1 | 0.441579002  | 2.50E-19 | postive  |
| CCR2    | AC090559.1 | 0.640437175  | 1.12E-44 | postive  |
| CXCR4   | AC090559.1 | 0.463904889  | 2.07E-21 | postive  |
| ITPR1   | AC090559.1 | 0.489260206  | 5.77E-24 | postive  |
| NLRC4   | AC090559.1 | 0.618775808  | 5.32E-41 | postive  |
| PEA15   | AC090559.1 | 0.44413356   | 1.47E-19 | postive  |
| ATG16L2 | AC118344.1 | 0.464613779  | 1.77E-21 | postive  |
| ATG16L2 | AC012557.1 | 0.400562792  | 6.95E-16 | postive  |
| ATG2B   | AC012557.1 | 0.450838845  | 3.58E-20 | postive  |
| MLST8   | AC012557.1 | -0.424055813 | 8.45E-18 | negative |
| TBK1    | AC005034.3 | 0.422652725  | 1.11E-17 | postive  |
| BCL2    | MIATNB     | 0.445519504  | 1.10E-19 | postive  |
| CXCR4   | MIATNB     | 0.420476557  | 1.69E-17 | postive  |
| FOXO3   | NORAD      | 0.462602433  | 2.77E-21 | postive  |
| KLHL24  | NORAD      | 0.510629303  | 2.72E-26 | postive  |
| RB1CC1  | NORAD      | 0.464648797  | 1.76E-21 | postive  |
| TP63    | AC103563.2 | 0.40606558   | 2.55E-16 | postive  |
| ATG16L2 | AL157392.3 | 0.564639222  | 5.82E-33 | postive  |
| ATG2B   | AL157392.3 | 0.475883154  | 1.37E-22 | postive  |
| BAK1    | AL157392.3 | -0.417356501 | 3.08E-17 | negative |
| GAPDH   | AL157392.3 | -0.407951337 | 1.80E-16 | negative |
| IKBKB   | AL157392.3 | 0.437233975  | 6.10E-19 | postive  |
| MLST8   | AL157392.3 | -0.405543722 | 2.81E-16 | negative |
| TSC1    | AL157392.3 | 0.517687437  | 4.26E-27 | postive  |
| PRKCQ   | DBH-AS1    | 0.446349813  | 9.25E-20 | postive  |
| DLC1    | AC011472.1 | 0.435489978  | 8.70E-19 | postive  |

|         |            |              |          |          |
|---------|------------|--------------|----------|----------|
| GAPDH   | AC011472.1 | -0.404800796 | 3.22E-16 | negative |
| HSPB8   | AC011472.1 | 0.650139942  | 2.02E-46 | postive  |
| ITPR1   | AC011472.1 | 0.463458224  | 2.29E-21 | postive  |
| P4HB    | AC011472.1 | -0.442000571 | 2.29E-19 | negative |
| ULK2    | AC011472.1 | 0.427638213  | 4.18E-18 | postive  |
| ARSB    | AP001528.1 | 0.505353189  | 1.06E-25 | postive  |
| ATIC    | AP001528.1 | -0.41565772  | 4.25E-17 | negative |
| BCL2    | AP001528.1 | 0.545537704  | 1.83E-30 | postive  |
| BIRC5   | AP001528.1 | -0.405347059 | 2.91E-16 | negative |
| DLC1    | AP001528.1 | 0.705917404  | 7.86E-58 | postive  |
| HSPB8   | AP001528.1 | 0.436054052  | 7.76E-19 | postive  |
| ITPR1   | AP001528.1 | 0.704045787  | 2.10E-57 | postive  |
| MAP1LC3 | AP001528.1 | 0.448517257  | 5.85E-20 | postive  |
| PEA15   | AP001528.1 | 0.402597467  | 4.81E-16 | postive  |
| ULK2    | AP001528.1 | 0.449402547  | 4.85E-20 | postive  |
| ZFYVE1  | AP001528.1 | 0.417872288  | 2.79E-17 | postive  |
| ATG16L2 | AC254562.3 | 0.428958946  | 3.22E-18 | postive  |
| TSC2    | AC254562.3 | 0.414397224  | 5.40E-17 | postive  |
| ATG16L2 | AC008937.2 | 0.512779237  | 1.55E-26 | postive  |
| BCL2    | AC008937.2 | 0.420923919  | 1.55E-17 | postive  |
| CFLAR   | AC008937.2 | 0.400725466  | 6.75E-16 | postive  |
| CXCR4   | AC008937.2 | 0.406431763  | 2.39E-16 | postive  |
| DLC1    | AC015922.2 | 0.400578602  | 6.93E-16 | postive  |
| ARSB    | SETBP1-DT  | 0.448551605  | 5.81E-20 | postive  |
| ATIC    | SETBP1-DT  | -0.421362351 | 1.43E-17 | negative |
| BCL2    | SETBP1-DT  | 0.607578702  | 3.28E-39 | postive  |
| BIRC5   | SETBP1-DT  | -0.445595512 | 1.08E-19 | negative |
| DLC1    | SETBP1-DT  | 0.589385349  | 1.90E-36 | postive  |
| GABARAP | SETBP1-DT  | 0.446847379  | 8.33E-20 | postive  |
| HSPA5   | SETBP1-DT  | -0.459455283 | 5.55E-21 | negative |
| HSPB8   | SETBP1-DT  | 0.592324201  | 6.98E-37 | postive  |
| ITPR1   | SETBP1-DT  | 0.696960769  | 8.03E-56 | postive  |
| MAP1LC3 | SETBP1-DT  | 0.420255624  | 1.77E-17 | postive  |
| NRG2    | SETBP1-DT  | 0.435661929  | 8.40E-19 | postive  |
| PEA15   | SETBP1-DT  | 0.450065179  | 4.22E-20 | postive  |
| ULK2    | SETBP1-DT  | 0.426666721  | 5.07E-18 | postive  |
| WIPI2   | AL118506.1 | 0.41068187   | 1.09E-16 | postive  |
| ATG16L2 | AL049780.1 | 0.411429938  | 9.44E-17 | postive  |
| ATG2B   | AL049780.1 | 0.410896314  | 1.04E-16 | postive  |
| TSC1    | AL049780.1 | 0.449719593  | 4.54E-20 | postive  |
| BCL2    | EML4-AS1   | 0.534679758  | 4.10E-29 | postive  |
| CCR2    | EML4-AS1   | 0.5342931    | 4.57E-29 | postive  |
| CXCR4   | EML4-AS1   | 0.545856713  | 1.67E-30 | postive  |
| IFNG    | EML4-AS1   | 0.471397822  | 3.83E-22 | postive  |



|          |            |              |          |          |
|----------|------------|--------------|----------|----------|
| MAP1LC3  | EML4-AS1   | 0.40809775   | 1.75E-16 | postive  |
| NLRC4    | EML4-AS1   | 0.487708033  | 8.39E-24 | postive  |
| PRKCQ    | EML4-AS1   | 0.434882566  | 9.83E-19 | postive  |
| TSC1     | AC087222.1 | 0.401988576  | 5.37E-16 | postive  |
| GAPDH    | AL133245.1 | -0.401256795 | 6.13E-16 | negative |
| ATG16L2  | RUFY1-AS1  | 0.508851111  | 4.31E-26 | postive  |
| BCL2     | RUFY1-AS1  | 0.424469146  | 7.80E-18 | postive  |
| CFLAR    | RUFY1-AS1  | 0.437555711  | 5.71E-19 | postive  |
| GAPDH    | RUFY1-AS1  | -0.416019994 | 3.97E-17 | negative |
| ITPR1    | RUFY1-AS1  | 0.486934504  | 1.01E-23 | postive  |
| P4HB     | RUFY1-AS1  | -0.423446618 | 9.52E-18 | negative |
| CDKN2A   | RAB30-DT   | 0.412536723  | 7.67E-17 | postive  |
| GAPDH    | AC067852.3 | -0.441066819 | 2.78E-19 | negative |
| ATG16L2  | AC010186.3 | 0.507508253  | 6.09E-26 | postive  |
| BCL2     | AC010186.3 | 0.615813439  | 1.61E-40 | postive  |
| CFLAR    | AC010186.3 | 0.484460013  | 1.83E-23 | postive  |
| CXCR4    | AC010186.3 | 0.538232016  | 1.50E-29 | postive  |
| ITPR1    | AC010186.3 | 0.420295045  | 1.75E-17 | postive  |
| RGS19    | AC010186.3 | 0.415887351  | 4.07E-17 | postive  |
| UVRAG    | AC010186.3 | 0.419953541  | 1.87E-17 | postive  |
| ATG16L2  | AL662844.3 | 0.437256307  | 6.07E-19 | postive  |
| CFLAR    | AL662844.3 | 0.402729493  | 4.69E-16 | postive  |
| ITPR1    | CKMT2-AS1  | 0.400896369  | 6.54E-16 | postive  |
| MAP1LC3  | AC104170.1 | 0.465223178  | 1.55E-21 | postive  |
| CASP8    | AC091057.1 | 0.409563053  | 1.34E-16 | postive  |
| ATG16L2  | AP4B1-AS1  | 0.600157541  | 4.61E-38 | postive  |
| BIRC6    | AP4B1-AS1  | 0.415121129  | 4.71E-17 | postive  |
| CFLAR    | AP4B1-AS1  | 0.430651891  | 2.30E-18 | postive  |
| IKBKB    | AP4B1-AS1  | 0.43352723   | 1.29E-18 | postive  |
| TSC1     | AP4B1-AS1  | 0.410092054  | 1.21E-16 | postive  |
| CHMP4B   | ELF3-AS1   | 0.443774626  | 1.58E-19 | postive  |
| PIK3C3   | LINC00909  | 0.447486574  | 7.28E-20 | postive  |
| DLC1     | A2M-AS1    | 0.587180742  | 3.99E-36 | postive  |
| GABARAP  | A2M-AS1    | 0.509635629  | 3.52E-26 | postive  |
| HDAC1    | A2M-AS1    | -0.42567658  | 6.16E-18 | negative |
| HSPB8    | A2M-AS1    | 0.740589806  | 2.21E-66 | postive  |
| ITPR1    | A2M-AS1    | 0.541248988  | 6.34E-30 | postive  |
| NRG2     | A2M-AS1    | 0.50465476   | 1.26E-25 | postive  |
| PEA15    | A2M-AS1    | 0.413012158  | 7.01E-17 | postive  |
| ULK2     | A2M-AS1    | 0.529740818  | 1.63E-28 | postive  |
| FADD     | AP002784.1 | 0.419392133  | 2.09E-17 | postive  |
| MAP2K7   | AP002784.1 | 0.563598014  | 8.05E-33 | postive  |
| MAPK8IP1 | AP002784.1 | 0.671187155  | 1.96E-50 | postive  |
| PEX3     | AP002784.1 | 0.629963382  | 7.30E-43 | postive  |

|         |            |             |          |         |
|---------|------------|-------------|----------|---------|
| TSC1    | AC015813.1 | 0.417714103 | 2.88E-17 | postive |
| BCL2    | OIP5-AS1   | 0.525432301 | 5.30E-28 | postive |
| ITPR1   | OIP5-AS1   | 0.426966879 | 4.78E-18 | postive |
| PTEN    | OIP5-AS1   | 0.402454497 | 4.93E-16 | postive |
| ULK2    | OIP5-AS1   | 0.432924084 | 1.46E-18 | postive |
| BIRC6   | Z68871.1   | 0.439593451 | 3.76E-19 | postive |
| GOPC    | Z68871.1   | 0.401207999 | 6.18E-16 | postive |
| HDAC6   | Z68871.1   | 0.409119305 | 1.45E-16 | postive |
| RB1CC1  | Z68871.1   | 0.401438293 | 5.93E-16 | postive |
| TSC1    | Z68871.1   | 0.437161171 | 6.19E-19 | postive |
| GOPC    | AC008735.2 | 0.407478058 | 1.97E-16 | postive |
| TSC1    | AC008735.2 | 0.430175721 | 2.53E-18 | postive |
| ATG16L2 | AC007728.2 | 0.528405479 | 2.35E-28 | postive |
| BCL2    | AC007728.2 | 0.616013478 | 1.49E-40 | postive |
| CCR2    | AC007728.2 | 0.565986595 | 3.83E-33 | postive |
| CFLAR   | AC007728.2 | 0.524986411 | 5.99E-28 | postive |
| CXCR4   | AC007728.2 | 0.563099817 | 9.39E-33 | postive |
| ITPR1   | AC007728.2 | 0.441600764 | 2.49E-19 | postive |
| NLRC4   | AC007728.2 | 0.405761629 | 2.70E-16 | postive |
| PRKCQ   | AC007728.2 | 0.451955324 | 2.82E-20 | postive |
| ATG16L2 | AL031714.1 | 0.462563952 | 2.79E-21 | postive |
| TSC1    | AL031714.1 | 0.436165001 | 7.58E-19 | postive |
| TSC2    | AL031714.1 | 0.427373392 | 4.41E-18 | postive |
| ATG16L2 | AC004492.1 | 0.51146698  | 2.19E-26 | postive |
| ATG2B   | AC004492.1 | 0.452134772 | 2.71E-20 | postive |
| GRID1   | AC245297.3 | 0.484600617 | 1.77E-23 | postive |
| DDIT3   | AP005233.2 | 0.573138162 | 3.99E-34 | postive |
| ATG16L2 | AL512306.3 | 0.421214329 | 1.47E-17 | postive |
| CFLAR   | AL512306.3 | 0.401084663 | 6.32E-16 | postive |
| ATIC    | EMSLR      | 0.470612286 | 4.59E-22 | postive |
| EIF2S1  | EMSLR      | 0.407567084 | 1.93E-16 | postive |
| MYC     | EMSLR      | 0.588354761 | 2.69E-36 | postive |
| ATG16L2 | AL135999.1 | 0.620528894 | 2.75E-41 | postive |
| ATG2B   | AL135999.1 | 0.434520419 | 1.06E-18 | postive |
| IKBKB   | AL135999.1 | 0.407611766 | 1.92E-16 | postive |
| TSC1    | AL135999.1 | 0.476621516 | 1.15E-22 | postive |
| ATG16L2 | AC020907.4 | 0.402886677 | 4.56E-16 | postive |
| CTSD    | PELATON    | 0.503527214 | 1.68E-25 | postive |
| NLRC4   | PELATON    | 0.478375623 | 7.66E-23 | postive |
| ATG16L2 | AC007878.1 | 0.570306575 | 9.83E-34 | postive |
| ATG2B   | AC007878.1 | 0.475141099 | 1.62E-22 | postive |
| BIRC6   | AC007878.1 | 0.421719069 | 1.33E-17 | postive |
| CFLAR   | AC007878.1 | 0.46345696  | 2.29E-21 | postive |
| IKBKB   | AC007878.1 | 0.43893418  | 4.31E-19 | postive |

|         |            |             |          |         |
|---------|------------|-------------|----------|---------|
| TSC1    | AC007878.1 | 0.415890317 | 4.07E-17 | postive |
| CHMP2B  | AC022509.3 | 0.400299855 | 7.29E-16 | postive |
| NCKAP1  | AC022509.3 | 0.445021629 | 1.22E-19 | postive |
| DLC1    | AL356417.2 | 0.405029238 | 3.09E-16 | postive |
| PEA15   | AL356417.2 | 0.437649408 | 5.60E-19 | postive |
| BCL2    | NR2F2-AS1  | 0.455152483 | 1.42E-20 | postive |
| DLC1    | NR2F2-AS1  | 0.481349698 | 3.81E-23 | postive |
| GABARAP | NR2F2-AS1  | 0.472107521 | 3.26E-22 | postive |
| HSPB8   | NR2F2-AS1  | 0.470900723 | 4.29E-22 | postive |
| ITPR1   | NR2F2-AS1  | 0.600370437 | 4.28E-38 | postive |
| NRG2    | NR2F2-AS1  | 0.427323953 | 4.45E-18 | postive |
| ULK2    | NR2F2-AS1  | 0.417820737 | 2.82E-17 | postive |
| ATG16L2 | AC027514.2 | 0.477577314 | 9.23E-23 | postive |
| IKBKB   | AC027514.2 | 0.415291788 | 4.56E-17 | postive |
| ATG16L2 | MATN1-AS1  | 0.454074144 | 1.79E-20 | postive |
| PTK6    | AL451042.2 | 0.404060783 | 3.68E-16 | postive |
| BCL2    | AC099524.1 | 0.45622163  | 1.12E-20 | postive |
| CXCR4   | AC099524.1 | 0.430652325 | 2.30E-18 | postive |
| PARP1   | AC099524.1 | 0.495421064 | 1.28E-24 | postive |
| RGS19   | AC099524.1 | 0.697848005 | 5.12E-56 | postive |
| ATG16L2 | LINC00893  | 0.474081181 | 2.07E-22 | postive |
| MAP1LC3 | AC100810.1 | 0.413640705 | 6.23E-17 | postive |
| BCL2    | LINC00924  | 0.477318663 | 9.80E-23 | postive |
| DLC1    | LINC00924  | 0.575396522 | 1.93E-34 | postive |
| ITPR1   | LINC00924  | 0.52405149  | 7.72E-28 | postive |
| MAP1LC3 | LINC00924  | 0.43792713  | 5.30E-19 | postive |
| PEA15   | LINC00924  | 0.451103948 | 3.38E-20 | postive |
| BCL2    | AC011450.1 | 0.430516612 | 2.36E-18 | postive |
| ITPR1   | AC011450.1 | 0.402446672 | 4.94E-16 | postive |
| ATG16L2 | AC004908.1 | 0.449974581 | 4.30E-20 | postive |
| IKBKB   | AC004908.1 | 0.489281558 | 5.74E-24 | postive |
| TSC1    | AC004908.1 | 0.453229404 | 2.14E-20 | postive |
| TP63    | AC004816.1 | 0.475502839 | 1.49E-22 | postive |
| ATG16L2 | AC011465.1 | 0.408197595 | 1.72E-16 | postive |
| BIRC6   | AC007114.2 | 0.436127296 | 7.64E-19 | postive |
| GRID1   | GAS5       | 0.434161601 | 1.14E-18 | postive |
| BECN1   | AC067852.2 | 0.467511834 | 9.25E-22 | postive |
| HGS     | AC067852.2 | 0.437716794 | 5.53E-19 | postive |
| MLST8   | AC067852.2 | 0.462869628 | 2.61E-21 | postive |
| RELA    | AC067852.2 | 0.410506129 | 1.12E-16 | postive |
| SPNS1   | AC067852.2 | 0.470667194 | 4.53E-22 | postive |
| DLC1    | FGF14-AS2  | 0.435315761 | 9.01E-19 | postive |
| GABARAP | FGF14-AS2  | 0.469238178 | 6.26E-22 | postive |
| GRID1   | FGF14-AS2  | 0.416462351 | 3.65E-17 | postive |

|          |            |              |          |          |
|----------|------------|--------------|----------|----------|
| HSPB8    | FGF14-AS2  | 0.593581923  | 4.53E-37 | postive  |
| ITPR1    | FGF14-AS2  | 0.428132413  | 3.79E-18 | postive  |
| NRG2     | FGF14-AS2  | 0.424683629  | 7.48E-18 | postive  |
| ULK2     | FGF14-AS2  | 0.412917576  | 7.14E-17 | postive  |
| ATG16L2  | AC037459.2 | 0.433612589  | 1.27E-18 | postive  |
| IKBKB    | AC037459.2 | 0.604158899  | 1.12E-38 | postive  |
| BECN1    | AP003352.1 | -0.402875195 | 4.57E-16 | negative |
| HSPB8    | AP003059.1 | 0.411894206  | 8.65E-17 | postive  |
| HDAC6    | ZNF674-AS1 | 0.420605314  | 1.65E-17 | postive  |
| WDR45    | ZNF674-AS1 | 0.432626853  | 1.55E-18 | postive  |
| ATG16L2  | AC232271.1 | 0.450913148  | 3.52E-20 | postive  |
| TSC1     | AC232271.1 | 0.450056441  | 4.22E-20 | postive  |
| DLC1     | AC037198.1 | 0.581508811  | 2.63E-35 | postive  |
| GABARAP  | AC037198.1 | 0.436454462  | 7.15E-19 | postive  |
| DDIT3    | AC121761.1 | 0.578545952  | 6.95E-35 | postive  |
| MAP2K7   | LINC00957  | 0.493843107  | 1.89E-24 | postive  |
| MAPK8IP1 | LINC00957  | 0.512631427  | 1.62E-26 | postive  |
| GABARAP  | AC087477.2 | 0.529397233  | 1.79E-28 | postive  |
| ITGA3    | MIR31HG    | 0.463334033  | 2.36E-21 | postive  |
| ATG16L2  | AP005131.3 | 0.412636681  | 7.53E-17 | postive  |
| TSC1     | AC007066.2 | 0.53996977   | 9.15E-30 | postive  |
| HIF1A    | AC112496.1 | 0.421859119  | 1.30E-17 | postive  |
| IL24     | AC112496.1 | 0.666891526  | 1.37E-49 | postive  |
| NAMPT    | AC112496.1 | 0.478520952  | 7.41E-23 | postive  |
| BIRC5    | AC007637.1 | -0.431217148 | 2.05E-18 | negative |
| DLC1     | AC007637.1 | 0.412708604  | 7.42E-17 | postive  |
| GAPDH    | AC007637.1 | -0.400510173 | 7.01E-16 | negative |
| ITPR1    | AC007637.1 | 0.463986524  | 2.04E-21 | postive  |
| MAP1LC3  | GTF3C2-AS1 | 0.482443276  | 2.95E-23 | postive  |
| SQSTM1   | LINC01137  | 0.426358339  | 5.38E-18 | postive  |
| MAP1LC3  | UBXN7-AS1  | 0.578607045  | 6.81E-35 | postive  |
| ATG16L2  | AC089999.2 | 0.434998086  | 9.61E-19 | postive  |
| FKBP1A   | AL117332.1 | 0.447114548  | 7.87E-20 | postive  |
| ATG16L2  | HCG27      | 0.441338575  | 2.63E-19 | postive  |
| CFLAR    | HCG27      | 0.413967192  | 5.86E-17 | postive  |
| ATG16L2  | AC016747.3 | 0.434639578  | 1.03E-18 | postive  |
| GAPDH    | AC016747.3 | -0.409280627 | 1.41E-16 | negative |
| ATG16L2  | SEMA3F-AS1 | 0.645101727  | 1.66E-45 | postive  |
| ATG2B    | SEMA3F-AS1 | 0.452617253  | 2.44E-20 | postive  |
| CFLAR    | SEMA3F-AS1 | 0.403331882  | 4.21E-16 | postive  |
| GAPDH    | SEMA3F-AS1 | -0.40644453  | 2.38E-16 | negative |
| IKBKB    | SEMA3F-AS1 | 0.497793737  | 7.11E-25 | postive  |
| MLST8    | SEMA3F-AS1 | -0.413829256 | 6.01E-17 | negative |
| TSC1     | SEMA3F-AS1 | 0.455292626  | 1.37E-20 | postive  |

|         |             |              |          |          |
|---------|-------------|--------------|----------|----------|
| HSPB8   | AC120498.10 | 0.473664343  | 2.28E-22 | postive  |
| RGS19   | AC023510.2  | 0.412710682  | 7.42E-17 | postive  |
| BCL2    | AL662844.4  | 0.452590866  | 2.46E-20 | postive  |
| CXCR4   | AL662844.4  | 0.410717718  | 1.08E-16 | postive  |
| ITPR1   | AL662844.4  | 0.432360504  | 1.63E-18 | postive  |
| MAP1LC3 | AC017104.2  | 0.444103511  | 1.48E-19 | postive  |
| CCR2    | LINC01094   | 0.470975951  | 4.22E-22 | postive  |
| DRAM1   | LINC01094   | 0.434875477  | 9.85E-19 | postive  |
| NLRC4   | LINC01094   | 0.655406572  | 2.14E-47 | postive  |
| ATG4B   | LINC02604   | 0.408975567  | 1.49E-16 | postive  |
| ARSB    | AC104117.3  | 0.502719833  | 2.07E-25 | postive  |
| ATIC    | AC104117.3  | -0.40356723  | 4.03E-16 | negative |
| BCL2    | AC104117.3  | 0.45529308   | 1.37E-20 | postive  |
| DLC1    | AC104117.3  | 0.646217975  | 1.04E-45 | postive  |
| GABARAP | AC104117.3  | 0.500058166  | 4.04E-25 | postive  |
| GRID1   | AC104117.3  | 0.422308778  | 1.19E-17 | postive  |
| HDAC1   | AC104117.3  | -0.412585493 | 7.60E-17 | negative |
| HSPB8   | AC104117.3  | 0.57983162   | 4.57E-35 | postive  |
| ITPR1   | AC104117.3  | 0.640389829  | 1.14E-44 | postive  |
| ULK2    | AC104117.3  | 0.506690655  | 7.52E-26 | postive  |
| ZFYVE1  | AC104117.3  | 0.483914316  | 2.08E-23 | postive  |
| ATG16L2 | INE1        | 0.52693298   | 3.52E-28 | postive  |
| IKBKB   | INE1        | 0.440023741  | 3.45E-19 | postive  |
| BAG3    | PLAC4       | 0.51840966   | 3.52E-27 | postive  |
| DNAJB1  | PLAC4       | 0.403052796  | 4.43E-16 | postive  |
| ATG16L2 | AC011477.1  | 0.456504933  | 1.06E-20 | postive  |
| BCL2    | AC011477.1  | 0.453831982  | 1.88E-20 | postive  |
| CFLAR   | AC011477.1  | 0.418430038  | 2.51E-17 | postive  |
| ATG16L2 | AC079921.1  | 0.421120969  | 1.49E-17 | postive  |
| BCL2    | AC079921.1  | 0.490227239  | 4.56E-24 | postive  |
| CFLAR   | AC079921.1  | 0.456692689  | 1.01E-20 | postive  |
| DLC1    | AC079921.1  | 0.449767759  | 4.49E-20 | postive  |
| ITPR1   | AC079921.1  | 0.522029915  | 1.33E-27 | postive  |
| ATG16L2 | AC009686.1  | 0.453324154  | 2.10E-20 | postive  |
| ATG16L2 | AC098851.1  | 0.456516673  | 1.05E-20 | postive  |
| ATG16L2 | AC067945.2  | 0.497133325  | 8.37E-25 | postive  |
| BCL2    | AC067945.2  | 0.406866782  | 2.20E-16 | postive  |
| CCR2    | AC067945.2  | 0.447703684  | 6.95E-20 | postive  |
| CFLAR   | AC067945.2  | 0.472024485  | 3.32E-22 | postive  |
| CXCR4   | AC067945.2  | 0.479073923  | 6.51E-23 | postive  |
| NLRC4   | AC067945.2  | 0.433693674  | 1.25E-18 | postive  |
| ATG5    | IRAIN       | 0.498484831  | 5.98E-25 | postive  |
| MAP1LC3 | AC020911.1  | 0.411304559  | 9.66E-17 | postive  |
| TP63    | MIR205HG    | 0.719856702  | 4.10E-61 | postive  |

|          |            |              |           |          |
|----------|------------|--------------|-----------|----------|
| PINK1    | AC024060.2 | -0.463629681 | 2.21E-21  | negative |
| MAP1LC3  | AC009107.2 | 0.41238001   | 7.90E-17  | postive  |
| DLC1     | DNAH10OS   | 0.409726611  | 1.30E-16  | postive  |
| HSPB8    | DNAH10OS   | 0.496446359  | 9.93E-25  | postive  |
| ITPR1    | DNAH10OS   | 0.432094379  | 1.72E-18  | postive  |
| ULK2     | DNAH10OS   | 0.442170751  | 2.21E-19  | postive  |
| CASP4    | LINC02363  | 0.401185647  | 6.21E-16  | postive  |
| ITPR1    | AC092718.3 | -0.425596712 | 6.25E-18  | negative |
| ULK2     | AC092718.3 | -0.406902718 | 2.19E-16  | negative |
| WDFY3    | AC092718.3 | -0.416474678 | 3.64E-17  | negative |
| ZFYVE1   | AC092718.3 | -0.449924092 | 4.34E-20  | negative |
| BCL2     | IFNG-AS1   | 0.475429836  | 1.52E-22  | postive  |
| CXCR4    | IFNG-AS1   | 0.542194842  | 4.83E-30  | postive  |
| ATG16L2  | RASSF1-AS1 | 0.527639383  | 2.90E-28  | postive  |
| BCL2     | RASSF1-AS1 | 0.401139156  | 6.26E-16  | postive  |
| LAMP1    | AL139384.1 | 0.526846728  | 3.60E-28  | postive  |
| ATG16L2  | AL133371.2 | 0.486145951  | 1.22E-23  | postive  |
| BCL2     | AL133371.2 | 0.644710531  | 1.95E-45  | postive  |
| CCR2     | AL133371.2 | 0.438489327  | 4.72E-19  | postive  |
| CFLAR    | AL133371.2 | 0.404630022  | 3.32E-16  | postive  |
| CXCR4    | AL133371.2 | 0.66527819   | 2.83E-49  | postive  |
| ITPR1    | AL133371.2 | 0.535736009  | 3.05E-29  | postive  |
| MAP1LC3  | AL133371.2 | 0.461022479  | 3.93E-21  | postive  |
| ATG16L2  | AL008582.1 | 0.465000375  | 1.63E-21  | postive  |
| BCL2     | AL008582.1 | 0.427541168  | 4.26E-18  | postive  |
| DLC1     | MBNL1-AS1  | 0.617090148  | 1.00E-40  | postive  |
| HSPB8    | MBNL1-AS1  | 0.844977166  | 2.02E-103 | postive  |
| ITGB1    | MBNL1-AS1  | 0.517287097  | 4.74E-27  | postive  |
| ITPR1    | MBNL1-AS1  | 0.541830206  | 5.36E-30  | postive  |
| NRG2     | MBNL1-AS1  | 0.402029494  | 5.33E-16  | postive  |
| PEA15    | MBNL1-AS1  | 0.442039598  | 2.27E-19  | postive  |
| ULK2     | MBNL1-AS1  | 0.481199045  | 3.95E-23  | postive  |
| CAPN1    | AC016888.1 | 0.433127164  | 1.40E-18  | postive  |
| HGS      | AC016888.1 | 0.430678606  | 2.29E-18  | postive  |
| MAPK3    | AC016888.1 | 0.408067171  | 1.76E-16  | postive  |
| KLHL24   | PAXBP1-AS1 | 0.406717421  | 2.26E-16  | postive  |
| MAPK8IP1 | PAXBP1-AS1 | 0.447773671  | 6.85E-20  | postive  |
| ARSB     | MIR100HG   | 0.460757277  | 4.17E-21  | postive  |
| BCL2     | MIR100HG   | 0.444463365  | 1.37E-19  | postive  |
| BIRC5    | MIR100HG   | -0.427624359 | 4.20E-18  | negative |
| DLC1     | MIR100HG   | 0.688140596  | 6.48E-54  | postive  |
| GABARAP  | MIR100HG   | 0.564757424  | 5.61E-33  | postive  |
| HDAC1    | MIR100HG   | -0.420276554 | 1.76E-17  | negative |
| HSPA5    | MIR100HG   | -0.434385383 | 1.09E-18  | negative |

|         |            |              |          |          |
|---------|------------|--------------|----------|----------|
| HSPB8   | MIR100HG   | 0.779156557  | 1.15E-77 | postive  |
| ITGB1   | MIR100HG   | 0.467448833  | 9.38E-22 | postive  |
| ITPR1   | MIR100HG   | 0.666376084  | 1.73E-49 | postive  |
| NRG2    | MIR100HG   | 0.438271355  | 4.94E-19 | postive  |
| P4HB    | MIR100HG   | -0.408030445 | 1.78E-16 | negative |
| PEA15   | MIR100HG   | 0.519336175  | 2.75E-27 | postive  |
| ULK2    | MIR100HG   | 0.539741492  | 9.77E-30 | postive  |
| NLRC4   | MMP2-AS1   | 0.440273742  | 3.27E-19 | postive  |
| ATG16L2 | AC027097.1 | 0.436563059  | 6.99E-19 | postive  |
| BCL2    | AC027097.1 | 0.474611184  | 1.83E-22 | postive  |
| CXCR4   | AC027097.1 | 0.463815191  | 2.12E-21 | postive  |
| ARSB    | LINC02593  | 0.466174108  | 1.25E-21 | postive  |
| DLC1    | LINC02593  | 0.430556539  | 2.34E-18 | postive  |
| ITPR1   | LINC02593  | 0.513511235  | 1.28E-26 | postive  |
| ATG16L2 | AC090739.1 | 0.471348999  | 3.88E-22 | postive  |
| IKBKB   | AC090739.1 | 0.574318768  | 2.73E-34 | postive  |
| GRID1   | AC092794.2 | 0.420751498  | 1.61E-17 | postive  |
| MAP1LC3 | LINC02611  | 0.621913745  | 1.63E-41 | postive  |
| NLRC4   | LINC02611  | 0.576245171  | 1.47E-34 | postive  |
| PARP1   | AC010247.1 | 0.64048695   | 1.10E-44 | postive  |
| RGS19   | AC010247.1 | 0.796484802  | 1.65E-83 | postive  |
| KLHL24  | EBLN3P     | 0.459100662  | 5.99E-21 | postive  |
| PIK3C3  | EBLN3P     | 0.402439679  | 4.95E-16 | postive  |
| TSC1    | EBLN3P     | 0.422262563  | 1.20E-17 | postive  |
| ARSB    | AL122035.1 | 0.546748259  | 1.29E-30 | postive  |
| BCL2    | AL122035.1 | 0.564300681  | 6.47E-33 | postive  |
| DLC1    | AL122035.1 | 0.62410197   | 7.06E-42 | postive  |
| GABARAP | AL122035.1 | 0.420469979  | 1.69E-17 | postive  |
| HSPB8   | AL122035.1 | 0.534873708  | 3.88E-29 | postive  |
| ITPR1   | AL122035.1 | 0.700126949  | 1.60E-56 | postive  |
| NRG2    | AL122035.1 | 0.431547057  | 1.92E-18 | postive  |
| ULK2    | AL122035.1 | 0.510076551  | 3.14E-26 | postive  |
| ZFYVE1  | AL122035.1 | 0.425432356  | 6.46E-18 | postive  |
| CASP4   | LINC01871  | 0.465411111  | 1.48E-21 | postive  |
| CX3CL1  | LINC01871  | 0.486042627  | 1.25E-23 | postive  |
| IFNG    | LINC01871  | 0.621149566  | 2.17E-41 | postive  |
| TNFSF10 | LINC01871  | 0.411353084  | 9.57E-17 | postive  |
| ATG16L2 | AL355076.2 | 0.503402074  | 1.74E-25 | postive  |
| BCL2    | AL355076.2 | 0.564646033  | 5.81E-33 | postive  |
| CXCR4   | AL355076.2 | 0.498962175  | 5.31E-25 | postive  |
| MAP1LC3 | AL355076.2 | 0.505195273  | 1.10E-25 | postive  |
| ATG16L2 | LINC00921  | 0.493464716  | 2.07E-24 | postive  |
| BCL2    | LINC00921  | 0.599667414  | 5.48E-38 | postive  |
| BIRC5   | LINC00921  | -0.40198357  | 5.37E-16 | negative |

|         |            |              |          |          |
|---------|------------|--------------|----------|----------|
| CFLAR   | LINC00921  | 0.452444424  | 2.54E-20 | postive  |
| CXCR4   | LINC00921  | 0.413566238  | 6.32E-17 | postive  |
| ITPR1   | LINC00921  | 0.543902481  | 2.95E-30 | postive  |
| TSC2    | LINC00921  | 0.44382482   | 1.57E-19 | postive  |
| DLC1    | COL4A2-AS1 | 0.558069103  | 4.39E-32 | postive  |
| HSPB8   | COL4A2-AS1 | 0.522013292  | 1.34E-27 | postive  |
| ITPR1   | COL4A2-AS1 | 0.513272113  | 1.37E-26 | postive  |
| P4HB    | AL583856.2 | -0.417190899 | 3.18E-17 | negative |
| IL24    | PEF1-AS1   | 0.433857929  | 1.21E-18 | postive  |
| ATG16L2 | AC087500.2 | 0.459362067  | 5.66E-21 | postive  |
| ATG16L2 | ZNF213-AS1 | 0.403114627  | 4.38E-16 | postive  |
| ATG16L2 | AC015849.3 | 0.44103807   | 2.80E-19 | postive  |
| ATG9A   | MAFG-DT    | 0.412979707  | 7.06E-17 | postive  |
| BIRC5   | MAFG-DT    | 0.456984637  | 9.52E-21 | postive  |
| GAA     | MAFG-DT    | 0.410823676  | 1.06E-16 | postive  |
| HGS     | MAFG-DT    | 0.428249545  | 3.71E-18 | postive  |
| MTOR    | Z98884.2   | 0.417639959  | 2.92E-17 | postive  |
| TSC1    | Z98884.2   | 0.400049683  | 7.62E-16 | postive  |
| BIRC6   | AC053513.2 | 0.403401193  | 4.15E-16 | postive  |
| CFLAR   | AC053513.2 | 0.407576233  | 1.93E-16 | postive  |
| ARSB    | LINC01150  | 0.405782068  | 2.69E-16 | postive  |
| CCR2    | LINC01150  | 0.434116185  | 1.15E-18 | postive  |
| MAP1LC3 | LINC01150  | 0.484437304  | 1.84E-23 | postive  |
| NLRC4   | LINC01150  | 0.562370098  | 1.18E-32 | postive  |
| PEA15   | LINC01150  | 0.416475344  | 3.64E-17 | postive  |
| ATG16L2 | AL021707.1 | 0.493653761  | 1.98E-24 | postive  |
| HDAC6   | LINC00630  | 0.41558407   | 4.31E-17 | postive  |
| LAMP2   | LINC00630  | 0.402256029  | 5.12E-16 | postive  |
| MBTPS2  | LINC00630  | 0.453243033  | 2.14E-20 | postive  |
| PIK3R4  | LINC00630  | 0.406266063  | 2.46E-16 | postive  |
| BCL2    | AC246787.2 | 0.465850683  | 1.34E-21 | postive  |
| CCR2    | AC246787.2 | 0.444335667  | 1.41E-19 | postive  |
| CXCR4   | AC246787.2 | 0.573108388  | 4.03E-34 | postive  |
| ATG16L2 | AC021188.1 | 0.40273403   | 4.69E-16 | postive  |
| BCL2    | AC021188.1 | 0.518238685  | 3.68E-27 | postive  |
| CCR2    | AC021188.1 | 0.462239307  | 3.00E-21 | postive  |
| CFLAR   | AC021188.1 | 0.438535084  | 4.68E-19 | postive  |
| CXCR4   | AC021188.1 | 0.454331018  | 1.69E-20 | postive  |
| MAP1LC3 | AC021188.1 | 0.439813849  | 3.60E-19 | postive  |
| NLRC4   | AC021188.1 | 0.430451667  | 2.39E-18 | postive  |
| PRKCQ   | AC021188.1 | 0.477136933  | 1.02E-22 | postive  |
| ATG16L2 | AC009152.1 | 0.411219933  | 9.81E-17 | postive  |
| IL24    | AC009152.1 | 0.415351303  | 4.51E-17 | postive  |
| P4HB    | LRIG2-DT   | -0.423349335 | 9.70E-18 | negative |



|         |            |              |          |          |
|---------|------------|--------------|----------|----------|
| PEX3    | DLEU1      | 0.430649875  | 2.30E-18 | postive  |
| BCL2    | AC018521.6 | 0.473969494  | 2.13E-22 | postive  |
| DLC1    | AC018521.6 | 0.468369194  | 7.63E-22 | postive  |
| HSPB8   | AC018521.6 | 0.491752955  | 3.15E-24 | postive  |
| ITPR1   | AC018521.6 | 0.555548877  | 9.42E-32 | postive  |
| ULK2    | AC018521.6 | 0.4286784    | 3.41E-18 | postive  |
| ZFYVE1  | AC018521.6 | 0.401163546  | 6.23E-16 | postive  |
| PTK6    | AC108134.1 | 0.40129572   | 6.09E-16 | postive  |
| ATG16L2 | AP005131.2 | 0.445731217  | 1.05E-19 | postive  |
| BCL2    | AP005131.2 | 0.460246268  | 4.66E-21 | postive  |
| ITPR1   | AP005131.2 | 0.411588194  | 9.16E-17 | postive  |
| ATG16L2 | AL353622.1 | 0.4139839    | 5.84E-17 | postive  |
| ATG16L2 | AL049840.6 | 0.575540622  | 1.84E-34 | postive  |
| ATG2B   | AL049840.6 | 0.508984273  | 4.17E-26 | postive  |
| BCL2    | AL049840.6 | 0.468489972  | 7.42E-22 | postive  |
| CFLAR   | AL049840.6 | 0.49668199   | 9.37E-25 | postive  |
| DLC1    | AL049840.6 | 0.420236639  | 1.77E-17 | postive  |
| GAPDH   | AL049840.6 | -0.401494344 | 5.87E-16 | negative |
| IKBKB   | AL049840.6 | 0.421843823  | 1.30E-17 | postive  |
| ITPR1   | AL049840.6 | 0.538303641  | 1.47E-29 | postive  |
| ULK2    | AL049840.6 | 0.404239744  | 3.56E-16 | postive  |
| ITPR1   | AC104667.2 | -0.435766431 | 8.22E-19 | negative |
| ATG16L2 | AL033397.2 | 0.400946714  | 6.48E-16 | postive  |
| BECN1   | AC067838.1 | -0.401972714 | 5.38E-16 | negative |
| BCL2    | AC008957.1 | 0.561344633  | 1.61E-32 | postive  |
| CCR2    | AC008957.1 | 0.41863979   | 2.41E-17 | postive  |
| CXCR4   | AC008957.1 | 0.558625243  | 3.71E-32 | postive  |
| MAP1LC3 | AC008957.1 | 0.416897659  | 3.36E-17 | postive  |
| ATG16L2 | AC007546.1 | 0.464767331  | 1.71E-21 | postive  |
| MAP1LC3 | AC007546.1 | 0.480118909  | 5.09E-23 | postive  |
| TSC1    | UBE2Q1-AS1 | 0.470779764  | 4.41E-22 | postive  |
| ATG16L2 | AC092143.3 | 0.479475912  | 5.92E-23 | postive  |
| ATG16L2 | AC009061.2 | 0.48516691   | 1.54E-23 | postive  |
| BCL2    | AC009061.2 | 0.450430073  | 3.90E-20 | postive  |
| CXCR4   | AC009061.2 | 0.43292036   | 1.46E-18 | postive  |
| EIF4G1  | BACE1-AS   | -0.402261418 | 5.11E-16 | negative |
| ATG16L2 | AC104564.5 | 0.552380188  | 2.44E-31 | postive  |
| MAP1LC3 | AC104564.5 | 0.4100949    | 1.21E-16 | postive  |
| ARSB    | SH3RF3-AS1 | 0.538347538  | 1.45E-29 | postive  |
| DLC1    | SH3RF3-AS1 | 0.496246885  | 1.04E-24 | postive  |
| ITPR1   | SH3RF3-AS1 | 0.435867981  | 8.05E-19 | postive  |
| PEA15   | SH3RF3-AS1 | 0.477248081  | 9.96E-23 | postive  |
| PINK1   | SH3RF3-AS1 | 0.449245386  | 5.02E-20 | postive  |
| MAP1LC3 | AC017006.2 | 0.450143026  | 4.15E-20 | postive  |

|         |            |              |           |          |
|---------|------------|--------------|-----------|----------|
| GRID1   | FZD10-AS1  | 0.59042568   | 1.33E-36  | postive  |
| RPS6KB1 | OPA1-AS1   | 0.405104449  | 3.04E-16  | postive  |
| RGS19   | AC109446.2 | 0.456950171  | 9.59E-21  | postive  |
| ATG16L2 | SSBP3-AS1  | 0.492395163  | 2.69E-24  | postive  |
| ATG2B   | SSBP3-AS1  | 0.508779593  | 4.39E-26  | postive  |
| BIRC6   | SSBP3-AS1  | 0.400737649  | 6.73E-16  | postive  |
| GAPDH   | SSBP3-AS1  | -0.420318537 | 1.74E-17  | negative |
| TSC1    | SSBP3-AS1  | 0.441535719  | 2.52E-19  | postive  |
| ATG16L2 | AL359715.2 | 0.419148077  | 2.19E-17  | postive  |
| ATG2B   | AL359715.2 | 0.463697391  | 2.17E-21  | postive  |
| PARP1   | DTNB-AS1   | 0.597593456  | 1.13E-37  | postive  |
| RGS19   | DTNB-AS1   | 0.756061645  | 1.18E-70  | postive  |
| ARSB    | AP003071.4 | 0.430529428  | 2.36E-18  | postive  |
| BCL2    | AP003071.4 | 0.429420176  | 2.94E-18  | postive  |
| DLC1    | AP003071.4 | 0.706914621  | 4.65E-58  | postive  |
| GABARAP | AP003071.4 | 0.456535209  | 1.05E-20  | postive  |
| HDAC1   | AP003071.4 | -0.421517168 | 1.38E-17  | negative |
| HSPA5   | AP003071.4 | -0.40485477  | 3.19E-16  | negative |
| HSPB8   | AP003071.4 | 0.845371783  | 1.30E-103 | postive  |
| ITGB1   | AP003071.4 | 0.469131508  | 6.42E-22  | postive  |
| ITPR1   | AP003071.4 | 0.648309743  | 4.36E-46  | postive  |
| NRG2    | AP003071.4 | 0.462276016  | 2.98E-21  | postive  |
| PEA15   | AP003071.4 | 0.476323793  | 1.23E-22  | postive  |
| PINK1   | AP003071.4 | 0.405396782  | 2.88E-16  | postive  |
| ULK2    | AP003071.4 | 0.536878372  | 2.21E-29  | postive  |
| ARSB    | LINC02693  | 0.467322792  | 9.65E-22  | postive  |
| DLC1    | LINC02693  | 0.47170631   | 3.57E-22  | postive  |
| ITPR1   | LINC02693  | 0.436489564  | 7.10E-19  | postive  |
| ULK2    | LINC02693  | 0.533083944  | 6.42E-29  | postive  |
| RAC1    | BX470102.1 | 0.401940122  | 5.42E-16  | postive  |
| HIF1A   | HIF1A-AS3  | 0.461559595  | 3.49E-21  | postive  |
| IL24    | HIF1A-AS3  | 0.613116008  | 4.36E-40  | postive  |
| MAP1LC3 | AC007731.3 | 0.505574309  | 1.00E-25  | postive  |
| ATG16L2 | IRF1-AS1   | 0.544253962  | 2.66E-30  | postive  |
| BCL2    | IRF1-AS1   | 0.530472411  | 1.33E-28  | postive  |
| CASP1   | IRF1-AS1   | 0.441312942  | 2.64E-19  | postive  |
| CCR2    | IRF1-AS1   | 0.457258563  | 8.96E-21  | postive  |
| CFLAR   | IRF1-AS1   | 0.57870402   | 6.60E-35  | postive  |
| EIF4G1  | AC011374.2 | -0.409442596 | 1.37E-16  | negative |
| HSPA8   | AC011374.2 | -0.403928942 | 3.77E-16  | negative |
| ATG16L2 | AC023825.2 | 0.45165936   | 3.00E-20  | postive  |
| CFLAR   | AC023825.2 | 0.404941906  | 3.14E-16  | postive  |
| ATG16L2 | AL031709.1 | 0.485828069  | 1.32E-23  | postive  |
| MAP1LC3 | AC099811.5 | 0.495691992  | 1.20E-24  | postive  |

|         |             |              |          |          |
|---------|-------------|--------------|----------|----------|
| NLRC4   | MIR223HG    | 0.509803884  | 3.37E-26 | postive  |
| CASP3   | AP001363.2  | -0.401638259 | 5.72E-16 | negative |
| GABARAP | AP001363.2  | 0.415837375  | 4.11E-17 | postive  |
| HSPB8   | AP001363.2  | 0.658170503  | 6.49E-48 | postive  |
| ITPR1   | AP001363.2  | 0.422092407  | 1.24E-17 | postive  |
| NRG2    | AP001363.2  | 0.447819489  | 6.79E-20 | postive  |
| PEA15   | AP001363.2  | 0.41608612   | 3.92E-17 | postive  |
| KLHL24  | NCBP2-AS1   | 0.403240586  | 4.28E-16 | postive  |
| DNAJB1  | AC012467.2  | 0.437372436  | 5.93E-19 | postive  |
| GAPDH   | AC048382.2  | -0.414736115 | 5.07E-17 | negative |
| GOPC    | WASHC5-AS1  | 0.469455955  | 5.96E-22 | postive  |
| ATG16L2 | KANSL1L-AS1 | 0.558189132  | 4.23E-32 | postive  |
| ATG16L2 | AL355075.2  | 0.550325269  | 4.49E-31 | postive  |
| ATG2B   | AL355075.2  | 0.417495347  | 3.00E-17 | postive  |
| ATG16L2 | AL035530.2  | 0.512782009  | 1.55E-26 | postive  |
| BCL2    | AL035530.2  | 0.465018271  | 1.62E-21 | postive  |
| CFLAR   | AL035530.2  | 0.462655482  | 2.74E-21 | postive  |
| CXCR4   | AL035530.2  | 0.4330598    | 1.42E-18 | postive  |
| ITPR1   | AL035530.2  | 0.404157403  | 3.62E-16 | postive  |
| MAP1LC3 | AL035530.2  | 0.471611558  | 3.65E-22 | postive  |
| P4HB    | AL035530.2  | -0.414612852 | 5.19E-17 | negative |
| CHMP4B  | AL035420.3  | 0.417833157  | 2.81E-17 | postive  |
| ATG16L2 | AC010761.3  | 0.463199224  | 2.43E-21 | postive  |
| ATG2B   | AC010761.3  | 0.446231909  | 9.48E-20 | postive  |
| BIRC6   | AC010761.3  | 0.414583364  | 5.21E-17 | postive  |
| GAPDH   | AC010761.3  | -0.40212312  | 5.24E-16 | negative |
| TSC1    | AC010761.3  | 0.443627611  | 1.63E-19 | postive  |
| EIF4G1  | AC108673.3  | -0.437408326 | 5.89E-19 | negative |
| BCL2    | RERG-IT1    | 0.417384042  | 3.06E-17 | postive  |
| DLC1    | RERG-IT1    | 0.488229405  | 7.40E-24 | postive  |
| HSPB8   | RERG-IT1    | 0.514063304  | 1.11E-26 | postive  |
| ITPR1   | RERG-IT1    | 0.490087753  | 4.72E-24 | postive  |
| ULK2    | RERG-IT1    | 0.435299687  | 9.04E-19 | postive  |
| VEGFA   | GRTP1-AS1   | 0.406758849  | 2.25E-16 | postive  |
| ARSB    | LINC02884   | 0.506051842  | 8.85E-26 | postive  |
| BCL2    | LINC02884   | 0.607605345  | 3.25E-39 | postive  |
| DLC1    | LINC02884   | 0.617497164  | 8.59E-41 | postive  |
| HSPB8   | LINC02884   | 0.400094219  | 7.56E-16 | postive  |
| ITPR1   | LINC02884   | 0.6568364    | 1.16E-47 | postive  |
| ULK2    | LINC02884   | 0.437016155  | 6.38E-19 | postive  |
| CFLAR   | AP000759.1  | 0.437713473  | 5.53E-19 | postive  |
| ATG16L2 | AL031670.1  | 0.462364337  | 2.92E-21 | postive  |
| ATG16L2 | C1RL-AS1    | 0.445532035  | 1.10E-19 | postive  |
| BIRC6   | C1RL-AS1    | 0.408716513  | 1.56E-16 | postive  |

|          |            |              |          |          |
|----------|------------|--------------|----------|----------|
| ATG16L2  | AL049840.3 | 0.435750455  | 8.25E-19 | postive  |
| ATG2B    | AL049840.3 | 0.558150293  | 4.28E-32 | postive  |
| BIRC6    | AL049840.3 | 0.444492043  | 1.36E-19 | postive  |
| IKBKB    | AL049840.3 | 0.435762058  | 8.23E-19 | postive  |
| TSC1     | AL049840.3 | 0.424806497  | 7.30E-18 | postive  |
| WIPI2    | AC092171.3 | 0.493988758  | 1.82E-24 | postive  |
| ATG16L2  | AC080162.1 | 0.498996503  | 5.26E-25 | postive  |
| ATG16L2  | AC002553.2 | 0.479501385  | 5.89E-23 | postive  |
| MLST8    | AC002553.2 | -0.410765795 | 1.07E-16 | negative |
| SQSTM1   | AC002553.2 | -0.415216861 | 4.63E-17 | negative |
| ATG16L2  | AC245060.2 | 0.502801822  | 2.02E-25 | postive  |
| TSC1     | AC245060.2 | 0.446278163  | 9.39E-20 | postive  |
| IKBKB    | MCCC1-AS1  | 0.425588097  | 6.26E-18 | postive  |
| KLHL24   | MCCC1-AS1  | 0.462840381  | 2.63E-21 | postive  |
| TSC1     | MCCC1-AS1  | 0.410577673  | 1.11E-16 | postive  |
| DIRAS3   | MIR7-3HG   | 0.461563856  | 3.49E-21 | postive  |
| GRID1    | MIR7-3HG   | 0.642617918  | 4.60E-45 | postive  |
| MAPK8IP1 | MIR7-3HG   | 0.401292469  | 6.09E-16 | postive  |
| ATG16L2  | AC090617.4 | 0.436986766  | 6.42E-19 | postive  |
| CFLAR    | AC090617.4 | 0.422786516  | 1.08E-17 | postive  |
| DLC1     | AL590226.1 | 0.460569611  | 4.34E-21 | postive  |
| TP63     | ACVR2B-AS1 | 0.429060804  | 3.16E-18 | postive  |
| BCL2     | AC097534.1 | 0.422431661  | 1.16E-17 | postive  |
| PIK3C3   | AC097534.1 | 0.422956804  | 1.05E-17 | postive  |
| ARSB     | MIR99AHG   | 0.491160452  | 3.64E-24 | postive  |
| ATIC     | MIR99AHG   | -0.407845293 | 1.84E-16 | negative |
| BCL2     | MIR99AHG   | 0.473129019  | 2.58E-22 | postive  |
| BIRC5    | MIR99AHG   | -0.450896233 | 3.53E-20 | negative |
| DLC1     | MIR99AHG   | 0.598175549  | 9.24E-38 | postive  |
| GABARAP  | MIR99AHG   | 0.500028369  | 4.07E-25 | postive  |
| HDAC1    | MIR99AHG   | -0.446092441 | 9.76E-20 | negative |
| HSPA5    | MIR99AHG   | -0.438175461 | 5.03E-19 | negative |
| HSPB8    | MIR99AHG   | 0.571839999  | 6.04E-34 | postive  |
| ITPR1    | MIR99AHG   | 0.634045304  | 1.46E-43 | postive  |
| PEA15    | MIR99AHG   | 0.463909631  | 2.07E-21 | postive  |
| ULK2     | MIR99AHG   | 0.474157228  | 2.04E-22 | postive  |
| PELP1    | AL133467.4 | 0.499207786  | 4.99E-25 | postive  |
| ATG16L2  | SH3BP5-AS1 | 0.672039881  | 1.33E-50 | postive  |
| ATG2B    | SH3BP5-AS1 | 0.439818363  | 3.59E-19 | postive  |
| BCL2     | SH3BP5-AS1 | 0.419600188  | 2.00E-17 | postive  |
| CFLAR    | SH3BP5-AS1 | 0.460327741  | 4.58E-21 | postive  |
| IKBKB    | SH3BP5-AS1 | 0.472876883  | 2.73E-22 | postive  |
| MLST8    | SH3BP5-AS1 | -0.401178215 | 6.22E-16 | negative |
| TSC1     | SH3BP5-AS1 | 0.404173324  | 3.61E-16 | postive  |

|         |            |              |          |          |
|---------|------------|--------------|----------|----------|
| FOS     | MIR23AHG   | 0.529745161  | 1.62E-28 | postive  |
| ATG16L2 | AC012645.3 | 0.458581429  | 6.72E-21 | postive  |
| BCL2    | AC012645.3 | 0.591975987  | 7.86E-37 | postive  |
| CXCR4   | AC012645.3 | 0.548699535  | 7.25E-31 | postive  |
| MAP1LC3 | AC012645.3 | 0.440479579  | 3.14E-19 | postive  |
| RGS19   | AC012645.3 | 0.527406265  | 3.09E-28 | postive  |
| ARSB    | AC008764.2 | 0.433459242  | 1.31E-18 | postive  |
| BCL2    | AC008764.2 | 0.618156707  | 6.71E-41 | postive  |
| BIRC5   | AC008764.2 | -0.41273483  | 7.39E-17 | negative |
| CFLAR   | AC008764.2 | 0.470689256  | 4.51E-22 | postive  |
| DLC1    | AC008764.2 | 0.432481641  | 1.60E-18 | postive  |
| HSPB8   | AC008764.2 | 0.413017491  | 7.01E-17 | postive  |
| ITPR1   | AC008764.2 | 0.593527031  | 4.62E-37 | postive  |
| ULK2    | AC008764.2 | 0.431206146  | 2.06E-18 | postive  |
| ATG16L2 | AC024075.3 | 0.449200429  | 5.07E-20 | postive  |
| BCL2    | AC024075.3 | 0.561653648  | 1.47E-32 | postive  |
| BIRC5   | AC024075.3 | -0.43961805  | 3.74E-19 | negative |
| CFLAR   | AC024075.3 | 0.473745999  | 2.24E-22 | postive  |
| GAPDH   | AC024075.3 | -0.412686862 | 7.46E-17 | negative |
| ITPR1   | AC024075.3 | 0.560000376  | 2.44E-32 | postive  |
| P4HB    | AC024075.3 | -0.421381719 | 1.42E-17 | negative |
| ULK2    | AC024075.3 | 0.419578536  | 2.01E-17 | postive  |
| HSPA8   | SND1-IT1   | -0.417927918 | 2.76E-17 | negative |
| ATG16L2 | AC021078.1 | 0.488973637  | 6.18E-24 | postive  |
| ATG2B   | AC021078.1 | 0.48853041   | 6.88E-24 | postive  |
| BIRC6   | AC021078.1 | 0.433427637  | 1.32E-18 | postive  |
| IKBKB   | AC021078.1 | 0.407079428  | 2.12E-16 | postive  |
| MLST8   | AC021078.1 | -0.469067576 | 6.51E-22 | negative |
| RPS6KB1 | AC021078.1 | 0.421507709  | 1.39E-17 | postive  |
| TSC1    | AC021078.1 | 0.439090344  | 4.17E-19 | postive  |
| ITPR1   | AC130650.1 | 0.443848797  | 1.56E-19 | postive  |
| HSPA8   | MRTFA-AS1  | -0.422506076 | 1.14E-17 | negative |
| ATG16L2 | AC012615.6 | 0.634360368  | 1.29E-43 | postive  |
| ATG2B   | AC012615.6 | 0.410044101  | 1.22E-16 | postive  |
| BIRC6   | AC012615.6 | 0.44983082   | 4.43E-20 | postive  |
| IKBKB   | AC012615.6 | 0.447876694  | 6.70E-20 | postive  |
| TSC1    | AC012615.6 | 0.443772655  | 1.59E-19 | postive  |
| TSC2    | AC012615.6 | 0.485340955  | 1.48E-23 | postive  |
| TP63    | PARD3-AS1  | 0.480457302  | 4.70E-23 | postive  |
| PRKAR1A | AC009065.2 | -0.435857611 | 8.07E-19 | negative |
| ATG4C   | AC006033.2 | 0.436625499  | 6.90E-19 | postive  |
| CCR2    | AC006033.2 | 0.634288001  | 1.33E-43 | postive  |
| CFLAR   | AC006033.2 | 0.438920686  | 4.32E-19 | postive  |
| CXCR4   | AC006033.2 | 0.4306521    | 2.30E-18 | postive  |

|         |            |              |          |          |
|---------|------------|--------------|----------|----------|
| FAS     | AC006033.2 | 0.458174399  | 7.34E-21 | postive  |
| IFNG    | AC006033.2 | 0.468202178  | 7.92E-22 | postive  |
| NLRC4   | AC006033.2 | 0.649238691  | 2.95E-46 | postive  |
| TNFSF10 | AC006033.2 | 0.410007451  | 1.23E-16 | postive  |
| NLRC4   | LINC01506  | 0.405236066  | 2.97E-16 | postive  |
| BCL2    | AC024075.1 | 0.56859383   | 1.69E-33 | postive  |
| BIRC5   | AC024075.1 | -0.43997947  | 3.48E-19 | negative |
| CFLAR   | AC024075.1 | 0.441518045  | 2.53E-19 | postive  |
| GAPDH   | AC024075.1 | -0.403996891 | 3.73E-16 | negative |
| HSPA5   | AC024075.1 | -0.402886831 | 4.56E-16 | negative |
| ITPR1   | AC024075.1 | 0.557107463  | 5.88E-32 | postive  |
| PELP1   | LINC01694  | 0.508928036  | 4.23E-26 | postive  |
| BAK1    | Z97989.1   | -0.413706405 | 6.15E-17 | negative |
| BCL2    | Z97989.1   | 0.456867268  | 9.76E-21 | postive  |
| FOXO3   | Z97989.1   | 0.429319869  | 3.00E-18 | postive  |
| GAPDH   | Z97989.1   | -0.415835128 | 4.11E-17 | negative |
| HSPB8   | Z97989.1   | 0.413087603  | 6.91E-17 | postive  |
| ITPR1   | Z97989.1   | 0.527005458  | 3.45E-28 | postive  |
| BIRC5   | AC022211.2 | 0.410872175  | 1.05E-16 | postive  |
| EIF4G1  | AC022211.2 | 0.420701877  | 1.62E-17 | postive  |
| HDAC6   | AC022211.2 | 0.410180509  | 1.19E-16 | postive  |
| HGS     | AC022211.2 | 0.423173212  | 1.00E-17 | postive  |
| PELP1   | AC022211.2 | 0.518120427  | 3.80E-27 | postive  |
| RPTOR   | AC022211.2 | 0.408178407  | 1.73E-16 | postive  |
| CX3CL1  | DLGAP1-AS5 | 0.422593946  | 1.12E-17 | postive  |
| IFNG    | DLGAP1-AS5 | 0.760964989  | 4.46E-72 | postive  |
| DLC1    | AC011510.1 | 0.485777464  | 1.33E-23 | postive  |
| ITPR1   | AC011510.1 | 0.452343551  | 2.59E-20 | postive  |
| DIRAS3  | AL022313.2 | 0.413079196  | 6.93E-17 | postive  |
| ATG16L2 | ARAP1-AS2  | 0.648554069  | 3.93E-46 | postive  |
| CFLAR   | ARAP1-AS2  | 0.418754652  | 2.36E-17 | postive  |
| UVRAG   | ARAP1-AS2  | 0.437901778  | 5.32E-19 | postive  |
| ATG16L2 | AC006435.2 | 0.571724145  | 6.26E-34 | postive  |
| TSC1    | AC006435.2 | 0.420285961  | 1.76E-17 | postive  |
| PARP1   | AC107884.1 | 0.532428829  | 7.70E-29 | postive  |
| RGS19   | AC107884.1 | 0.610640311  | 1.08E-39 | postive  |
| ATG16L2 | AC004494.1 | 0.62975169   | 7.93E-43 | postive  |
| BCL2    | AC004494.1 | 0.675301633  | 2.95E-51 | postive  |
| CCR2    | AC004494.1 | 0.409806944  | 1.28E-16 | postive  |
| CFLAR   | AC004494.1 | 0.538102462  | 1.56E-29 | postive  |
| CXCR4   | AC004494.1 | 0.578609085  | 6.81E-35 | postive  |
| ITPR1   | AC004494.1 | 0.500518474  | 3.60E-25 | postive  |
| MAP1LC3 | AC004494.1 | 0.430810979  | 2.23E-18 | postive  |
| BIRC5   | AP001065.4 | 0.435595384  | 8.51E-19 | postive  |

|          |            |             |          |          |
|----------|------------|-------------|----------|----------|
| ATG16L2  | AC138956.2 | 0.5803931   | 3.80E-35 | postive  |
| ATG2B    | AC138956.2 | 0.594085458 | 3.81E-37 | postive  |
| BIRC6    | AC138956.2 | 0.503096458 | 1.88E-25 | postive  |
| IKBKB    | AC138956.2 | 0.461966005 | 3.19E-21 | postive  |
| TSC1     | AC138956.2 | 0.568578002 | 1.70E-33 | postive  |
| PARP1    | LINC00649  | 0.434193319 | 1.13E-18 | postive  |
| RGS19    | LINC00649  | 0.47138445  | 3.85E-22 | postive  |
| BCL2     | AC096733.2 | 0.593861462 | 4.12E-37 | postive  |
| CXCR4    | AC096733.2 | 0.470670104 | 4.53E-22 | postive  |
| ITPR1    | AC096733.2 | 0.478250223 | 7.89E-23 | postive  |
| RGS19    | AC096733.2 | 0.467093787 | 1.02E-21 | postive  |
| GAPDH    | AC090198.1 | -0.42537801 | 6.53E-18 | negative |
| RB1CC1   | AC090198.1 | 0.414483144 | 5.31E-17 | postive  |
| HSPB8    | NEXN-AS1   | 0.428586319 | 3.47E-18 | postive  |
| GOPC     | AC093297.2 | 0.428737282 | 3.37E-18 | postive  |
| BAX      | LINC01943  | 0.41536282  | 4.50E-17 | postive  |
| ATG16L2  | AC010319.4 | 0.400489293 | 7.04E-16 | postive  |
| ATG16L2  | RHOA-IT1   | 0.416301512 | 3.76E-17 | postive  |
| RAB24    | AC114947.2 | 0.410398903 | 1.14E-16 | postive  |
| MAP1LC3  | AC114939.1 | 0.46514489  | 1.57E-21 | postive  |
| PARP1    | LINC01679  | 0.584332296 | 1.03E-35 | postive  |
| RGS19    | LINC01679  | 0.73394185  | 1.22E-64 | postive  |
| ATG16L2  | AL021707.6 | 0.416625439 | 3.54E-17 | postive  |
| PELP1    | AF186192.1 | 0.459450202 | 5.55E-21 | postive  |
| GRID1    | LINC01117  | 0.452099259 | 2.73E-20 | postive  |
| MAPK8IP1 | LINC01117  | 0.482955152 | 2.61E-23 | postive  |
| ATG16L2  | AC010149.1 | 0.461047082 | 3.91E-21 | postive  |
| BCL2     | AC010149.1 | 0.481950342 | 3.31E-23 | postive  |
| CFLAR    | AC010149.1 | 0.485537758 | 1.41E-23 | postive  |
| CXCR4    | AC010149.1 | 0.434711638 | 1.02E-18 | postive  |
| MAP1LC3  | AC010149.1 | 0.565437816 | 4.54E-33 | postive  |
| HSPB8    | AF111167.2 | 0.41448462  | 5.31E-17 | postive  |
| ITPR1    | AF111167.2 | 0.46466623  | 1.75E-21 | postive  |
| NRG2     | AF111167.2 | 0.412059542 | 8.39E-17 | postive  |
| UVRAG    | AF111167.2 | 0.42679857  | 4.94E-18 | postive  |
| HIF1A    | GK-AS1     | 0.489143468 | 5.93E-24 | postive  |
| IL24     | GK-AS1     | 0.738484544 | 7.97E-66 | postive  |
| NAMPT    | GK-AS1     | 0.530281199 | 1.40E-28 | postive  |
| WIPI1    | GK-AS1     | 0.449234139 | 5.03E-20 | postive  |
| CX3CL1   | LINC01480  | 0.576698073 | 1.27E-34 | postive  |
| IFNG     | LINC01480  | 0.680957963 | 2.07E-52 | postive  |
| ATG16L2  | AL139120.1 | 0.413777062 | 6.07E-17 | postive  |
| GRID1    | PDCD4-AS1  | 0.409504219 | 1.35E-16 | postive  |
| RGS19    | PDCD4-AS1  | 0.43381524  | 1.22E-18 | postive  |

|          |             |              |          |          |
|----------|-------------|--------------|----------|----------|
| ATG16L2  | PHACTR2-AS1 | 0.404433286  | 3.44E-16 | postive  |
| ATG16L2  | KIF1C-AS1   | 0.549097115  | 6.45E-31 | postive  |
| CDKN1B   | TSC22D1-AS1 | 0.431585082  | 1.91E-18 | postive  |
| MAP2K7   | TSC22D1-AS1 | 0.433398324  | 1.33E-18 | postive  |
| CASP4    | AC090912.2  | 0.436417204  | 7.20E-19 | postive  |
| CX3CL1   | AC090912.2  | 0.509466767  | 3.68E-26 | postive  |
| IFNG     | AC090912.2  | 0.623031164  | 1.06E-41 | postive  |
| CXCR4    | LINC02328   | 0.407909338  | 1.82E-16 | postive  |
| DLC1     | THCAT158    | 0.449201759  | 5.06E-20 | postive  |
| HSPB8    | THCAT158    | 0.463555298  | 2.24E-21 | postive  |
| ITPR1    | THCAT158    | 0.4361166    | 7.66E-19 | postive  |
| RAB33B   | RAB33B-AS1  | 0.574664165  | 2.44E-34 | postive  |
| BCL2     | AL391335.1  | 0.413261811  | 6.69E-17 | postive  |
| DLC1     | AL391335.1  | 0.548459395  | 7.79E-31 | postive  |
| HSPB8    | AL391335.1  | 0.764652232  | 3.61E-73 | postive  |
| ITPR1    | AL391335.1  | 0.527258663  | 3.22E-28 | postive  |
| NRG2     | AL391335.1  | 0.426989194  | 4.76E-18 | postive  |
| PINK1    | AL391335.1  | 0.420329714  | 1.74E-17 | postive  |
| ULK2     | AL391335.1  | 0.470050253  | 5.21E-22 | postive  |
| BCL2     | TFAP2E-AS1  | 0.429003688  | 3.19E-18 | postive  |
| CFLAR    | TFAP2E-AS1  | 0.40753528   | 1.95E-16 | postive  |
| CXCR4    | TFAP2E-AS1  | 0.448620456  | 5.73E-20 | postive  |
| NLR4     | TFAP2E-AS1  | 0.453814118  | 1.89E-20 | postive  |
| RGS19    | TFAP2E-AS1  | 0.677649207  | 9.85E-52 | postive  |
| BIRC5    | AC023509.3  | 0.419376301  | 2.09E-17 | postive  |
| PPP1R15A | AL021578.1  | 0.429224288  | 3.06E-18 | postive  |
| CAPN10   | AFDN-DT     | 0.403903107  | 3.79E-16 | postive  |
| PELP1    | AC091271.1  | 0.456295188  | 1.11E-20 | postive  |
| ATG16L2  | AC004148.1  | 0.507065739  | 6.83E-26 | postive  |
| IKBKB    | AC004148.1  | 0.442699565  | 1.98E-19 | postive  |
| SQSTM1   | AC004148.1  | -0.435012159 | 9.58E-19 | negative |
| TSC1     | AC004148.1  | 0.457682453  | 8.17E-21 | postive  |
| ATG16L2  | AC087286.4  | 0.441089351  | 2.77E-19 | postive  |
| CFLAR    | AC087286.4  | 0.485284774  | 1.50E-23 | postive  |
| GAPDH    | AC087286.4  | -0.415004839 | 4.81E-17 | negative |
| HGS      | BAIAP2-DT   | 0.431331533  | 2.01E-18 | postive  |
| LAMP1    | BAIAP2-DT   | 0.434480657  | 1.07E-18 | postive  |
| RPTOR    | BAIAP2-DT   | 0.438742198  | 4.48E-19 | postive  |
| ATG16L2  | LINC02422   | 0.53101964   | 1.14E-28 | postive  |
| BCL2     | LINC02422   | 0.658065733  | 6.79E-48 | postive  |
| CXCR4    | LINC02422   | 0.64724891   | 6.79E-46 | postive  |
| ITPR1    | LINC02422   | 0.443437579  | 1.70E-19 | postive  |
| MAP1LC3  | LINC02422   | 0.440755247  | 2.96E-19 | postive  |
| ARSB     | LINC02773   | 0.500810938  | 3.34E-25 | postive  |



|          |            |             |          |         |
|----------|------------|-------------|----------|---------|
| BCL2     | LINC02773  | 0.410742871 | 1.07E-16 | postive |
| CCR2     | LINC02773  | 0.451038408 | 3.43E-20 | postive |
| ITPR1    | LINC02773  | 0.439609356 | 3.75E-19 | postive |
| ATG16L2  | PIK3IP1-DT | 0.487408586 | 9.01E-24 | postive |
| IFNG     | AC022126.1 | 0.431303117 | 2.02E-18 | postive |
| TNFSF10  | AC022126.1 | 0.404508861 | 3.39E-16 | postive |
| ATG2B    | AC020558.2 | 0.430077463 | 2.58E-18 | postive |
| GOPC     | AC020558.2 | 0.412143742 | 8.26E-17 | postive |
| TSC1     | AC020558.2 | 0.433632669 | 1.27E-18 | postive |
| MAPK8IP1 | LINC01139  | 0.484363008 | 1.87E-23 | postive |
| PEX3     | LINC01139  | 0.409760622 | 1.29E-16 | postive |
| ITPR1    | LINC01589  | 0.416792292 | 3.43E-17 | postive |
| DLC1     | LINC01278  | 0.425317166 | 6.60E-18 | postive |
| GABARAP  | LINC01278  | 0.425482419 | 6.39E-18 | postive |
| GRID1    | LINC01278  | 0.45235222  | 2.59E-20 | postive |
| HSPB8    | LINC01278  | 0.636306667 | 5.93E-44 | postive |
| NRG2     | LINC01278  | 0.43974069  | 3.65E-19 | postive |
| ULK2     | LINC01278  | 0.454764586 | 1.54E-20 | postive |
| BCL2     | AL691447.2 | 0.489435053 | 5.53E-24 | postive |
| DLC1     | AL691447.2 | 0.510467726 | 2.84E-26 | postive |
| HSPB8    | AL691447.2 | 0.440300408 | 3.25E-19 | postive |
| ITPR1    | AL691447.2 | 0.561175355 | 1.70E-32 | postive |
| MAP1LC3  | AL691447.2 | 0.430441853 | 2.40E-18 | postive |
| BCL2     | AC012313.5 | 0.514397829 | 1.02E-26 | postive |
| DLC1     | AC012313.5 | 0.430656171 | 2.30E-18 | postive |
| ITPR1    | AC012313.5 | 0.601743437 | 2.64E-38 | postive |
| ARSB     | LINC01197  | 0.434844136 | 9.91E-19 | postive |
| BCL2     | LINC01197  | 0.636462873 | 5.57E-44 | postive |
| CXCR4    | LINC01197  | 0.500017585 | 4.08E-25 | postive |
| DLC1     | LINC01197  | 0.556579782 | 6.90E-32 | postive |
| ITPR1    | LINC01197  | 0.634713086 | 1.12E-43 | postive |
| MAP1LC3  | LINC01197  | 0.472297212 | 3.12E-22 | postive |
| BCL2     | TRBV11-2   | 0.497263682 | 8.11E-25 | postive |
| CCR2     | TRBV11-2   | 0.496657681 | 9.42E-25 | postive |
| CXCR4    | TRBV11-2   | 0.636042815 | 6.59E-44 | postive |
| MAPK8IP1 | DLEU2      | 0.452784138 | 2.36E-20 | postive |
| PEX3     | DLEU2      | 0.51457055  | 9.72E-27 | postive |
| RAB24    | ASMTL-AS1  | 0.448040238 | 6.48E-20 | postive |
| GRID1    | LINC00239  | 0.403364521 | 4.18E-16 | postive |
| PARP1    | AC023590.1 | 0.465453979 | 1.47E-21 | postive |
| RGS19    | AC023590.1 | 0.571296529 | 7.18E-34 | postive |
| BCL2     | CARD8-AS1  | 0.572061889 | 5.63E-34 | postive |
| CCR2     | CARD8-AS1  | 0.445019441 | 1.22E-19 | postive |
| CXCR4    | CARD8-AS1  | 0.505674633 | 9.75E-26 | postive |

|          |            |             |          |          |
|----------|------------|-------------|----------|----------|
| ITPR1    | CARD8-AS1  | 0.429596021 | 2.84E-18 | postive  |
| NLRC4    | CARD8-AS1  | 0.417737932 | 2.86E-17 | postive  |
| RGS19    | CARD8-AS1  | 0.476515753 | 1.18E-22 | postive  |
| BCL2     | AC069549.1 | 0.402283977 | 5.09E-16 | postive  |
| ATG4B    | KDM4A-AS1  | 0.419208185 | 2.16E-17 | postive  |
| BIRC5    | RHPN1-AS1  | 0.402419256 | 4.97E-16 | postive  |
| BCL2     | ZNF710-AS1 | 0.422996514 | 1.04E-17 | postive  |
| DLC1     | ZNF710-AS1 | 0.455319378 | 1.37E-20 | postive  |
| HSPB8    | ZNF710-AS1 | 0.637522557 | 3.64E-44 | postive  |
| ITPR1    | ZNF710-AS1 | 0.454846555 | 1.51E-20 | postive  |
| BCL2     | LINC02106  | 0.400023267 | 7.66E-16 | postive  |
| DLC1     | LINC02106  | 0.528308117 | 2.41E-28 | postive  |
| GABARAP  | LINC02106  | 0.426521317 | 5.21E-18 | postive  |
| HSPB8    | LINC02106  | 0.771258436 | 3.55E-75 | postive  |
| ITPR1    | LINC02106  | 0.600740244 | 3.76E-38 | postive  |
| NRG2     | LINC02106  | 0.510376581 | 2.91E-26 | postive  |
| PEA15    | LINC02106  | 0.447428019 | 7.37E-20 | postive  |
| ULK2     | LINC02106  | 0.45605209  | 1.17E-20 | postive  |
| HDAC6    | LINC01560  | 0.422129035 | 1.23E-17 | postive  |
| ATG16L2  | AC092653.1 | 0.529089948 | 1.95E-28 | postive  |
| BCL2     | AC092653.1 | 0.438638051 | 4.58E-19 | postive  |
| CFLAR    | AC092653.1 | 0.430119107 | 2.56E-18 | postive  |
| MAP1LC3  | AC092653.1 | 0.458426068 | 6.95E-21 | postive  |
| CASP1    | USP30-AS1  | 0.505255375 | 1.08E-25 | postive  |
| CASP4    | USP30-AS1  | 0.427913215 | 3.96E-18 | postive  |
| CX3CL1   | USP30-AS1  | 0.51279945  | 1.55E-26 | postive  |
| FAS      | USP30-AS1  | 0.451630761 | 3.02E-20 | postive  |
| IFNG     | USP30-AS1  | 0.566604891 | 3.15E-33 | postive  |
| TNFSF10  | USP30-AS1  | 0.50771807  | 5.77E-26 | postive  |
| FADD     | AP002336.2 | 0.482955208 | 2.61E-23 | postive  |
| ATG16L2  | AL136295.7 | 0.461128986 | 3.84E-21 | postive  |
| RAC1     | AC073332.1 | 0.504955207 | 1.17E-25 | postive  |
| IL24     | WNT5A-AS1  | 0.494422487 | 1.64E-24 | postive  |
| MAP1LC3  | AL035071.2 | 0.444500522 | 1.36E-19 | postive  |
| ATG16L2  | AC129510.1 | 0.418918803 | 2.28E-17 | postive  |
| TSC1     | AC129510.1 | 0.481500454 | 3.68E-23 | postive  |
| GRID1    | AC004540.1 | 0.462438493 | 2.87E-21 | postive  |
| MAPK8IP1 | AC004540.1 | 0.530109427 | 1.47E-28 | postive  |
| ULK2     | LAMC1-AS1  | 0.43137434  | 1.99E-18 | postive  |
| BECN1    | AC145423.1 | -0.40717813 | 2.08E-16 | negative |
| ATG16L2  | AL139407.1 | 0.5388509   | 1.26E-29 | postive  |
| ATG2B    | AL139407.1 | 0.499902553 | 4.20E-25 | postive  |
| BIRC6    | AL139407.1 | 0.446049919 | 9.85E-20 | postive  |
| CFLAR    | AL139407.1 | 0.412461276 | 7.78E-17 | postive  |

|          |             |              |          |          |
|----------|-------------|--------------|----------|----------|
| MLST8    | AL139407.1  | -0.417831387 | 2.81E-17 | negative |
| TSC1     | AL139407.1  | 0.416468894  | 3.65E-17 | postive  |
| ATIC     | AC093010.2  | -0.462451788 | 2.87E-21 | negative |
| BAK1     | AC093010.2  | -0.401549084 | 5.81E-16 | negative |
| BCL2     | AC093010.2  | 0.498638029  | 5.76E-25 | postive  |
| BIRC5    | AC093010.2  | -0.547074602 | 1.17E-30 | negative |
| CFLAR    | AC093010.2  | 0.403946907  | 3.76E-16 | postive  |
| DLC1     | AC093010.2  | 0.574728608  | 2.39E-34 | postive  |
| GABARAP  | AC093010.2  | 0.524962372  | 6.03E-28 | postive  |
| GAPDH    | AC093010.2  | -0.457298883 | 8.89E-21 | negative |
| HSPA5    | AC093010.2  | -0.440421701 | 3.17E-19 | negative |
| HSPB8    | AC093010.2  | 0.592782367  | 5.97E-37 | postive  |
| ITPR1    | AC093010.2  | 0.62407009   | 7.14E-42 | postive  |
| NRG2     | AC093010.2  | 0.439472842  | 3.86E-19 | postive  |
| P4HB     | AC093010.2  | -0.437601242 | 5.66E-19 | negative |
| PEA15    | AC093010.2  | 0.417640087  | 2.92E-17 | postive  |
| ULK2     | AC093010.2  | 0.439206907  | 4.07E-19 | postive  |
| MYC      | FAM222A-AS1 | 0.474655923  | 1.82E-22 | postive  |
| GRID1    | AC010997.4  | 0.445209625  | 1.17E-19 | postive  |
| BIRC5    | C6orf99     | 0.476330556  | 1.23E-22 | postive  |
| EIF4EBP1 | C6orf99     | 0.418829569  | 2.32E-17 | postive  |
| ARSB     | AL035409.1  | 0.495099071  | 1.39E-24 | postive  |
| DLC1     | AL035409.1  | 0.635589363  | 7.91E-44 | postive  |
| GABARAP  | AL035409.1  | 0.512185364  | 1.82E-26 | postive  |
| HSPB8    | AL035409.1  | 0.669168744  | 4.92E-50 | postive  |
| ITGB1    | AL035409.1  | 0.52999304   | 1.52E-28 | postive  |
| ITPR1    | AL035409.1  | 0.530892471  | 1.18E-28 | postive  |
| PEA15    | AL035409.1  | 0.416971075  | 3.31E-17 | postive  |
| ULK2     | AL035409.1  | 0.508445408  | 4.79E-26 | postive  |
| CDKN2A   | AC138207.2  | 0.4164937    | 3.63E-17 | postive  |
| ATG16L2  | AC004687.1  | 0.440227946  | 3.30E-19 | postive  |
| BCL2     | AC004687.1  | 0.525126911  | 5.77E-28 | postive  |
| CXCR4    | AC004687.1  | 0.529825058  | 1.59E-28 | postive  |
| RGS19    | AC004687.1  | 0.462274991  | 2.98E-21 | postive  |
| BCL2     | AC008083.3  | 0.447968434  | 6.57E-20 | postive  |
| CXCR4    | AC008083.3  | 0.404097415  | 3.66E-16 | postive  |
| PARP1    | AC008083.3  | 0.431874958  | 1.80E-18 | postive  |
| RGS19    | AC008083.3  | 0.667858821  | 8.89E-50 | postive  |
| ATG2B    | LINC00641   | 0.459996352  | 4.93E-21 | postive  |
| BAK1     | LINC00641   | -0.423963934 | 8.61E-18 | negative |
| BCL2     | LINC00641   | 0.431869137  | 1.80E-18 | postive  |
| DLC1     | LINC00641   | 0.507319104  | 6.40E-26 | postive  |
| HSPB8    | LINC00641   | 0.572064134  | 5.62E-34 | postive  |
| ITPR1    | LINC00641   | 0.551205423  | 3.46E-31 | postive  |

|          |              |              |          |          |
|----------|--------------|--------------|----------|----------|
| MLST8    | LINC00641    | -0.433094973 | 1.41E-18 | negative |
| P4HB     | LINC00641    | -0.404288791 | 3.53E-16 | negative |
| ULK2     | LINC00641    | 0.524903602  | 6.13E-28 | postive  |
| ITPR1    | AC012409.1   | 0.412422224  | 7.84E-17 | postive  |
| ATG4B    | SNHG11       | 0.457477553  | 8.55E-21 | postive  |
| CAPN10   | SNHG11       | 0.435237891  | 9.15E-19 | postive  |
| CHMP4B   | SNHG11       | 0.443082939  | 1.83E-19 | postive  |
| ATG16L2  | AL512770.1   | 0.488579422  | 6.80E-24 | postive  |
| ATG9A    | RAET1E-AS1   | 0.405162056  | 3.01E-16 | postive  |
| FADD     | RAET1E-AS1   | 0.416590242  | 3.56E-17 | postive  |
| MAP2K7   | RAET1E-AS1   | 0.43848715   | 4.72E-19 | postive  |
| MAPK8IP1 | RAET1E-AS1   | 0.425153499  | 6.82E-18 | postive  |
| SPNS1    | RAET1E-AS1   | 0.4444759    | 1.37E-19 | postive  |
| ATG16L2  | PSMD6-AS2    | 0.508184251  | 5.12E-26 | postive  |
| ATG2B    | PSMD6-AS2    | 0.525473509  | 5.25E-28 | postive  |
| BIRC6    | PSMD6-AS2    | 0.468745397  | 7.00E-22 | postive  |
| CFLAR    | PSMD6-AS2    | 0.424850384  | 7.24E-18 | postive  |
| IKBKB    | PSMD6-AS2    | 0.450350956  | 3.97E-20 | postive  |
| ATG16L2  | MIAT         | 0.470315328  | 4.91E-22 | postive  |
| BCL2     | MIAT         | 0.434231769  | 1.12E-18 | postive  |
| CCR2     | MIAT         | 0.549982454  | 4.97E-31 | postive  |
| CFLAR    | MIAT         | 0.476034096  | 1.32E-22 | postive  |
| IFNG     | MIAT         | 0.496401979  | 1.00E-24 | postive  |
| PRKCQ    | MIAT         | 0.432282206  | 1.66E-18 | postive  |
| DDIT3    | AL683813.1   | 0.467667236  | 8.93E-22 | postive  |
| KLHL24   | AL133243.2   | 0.454702132  | 1.56E-20 | postive  |
| ATG16L2  | AL021707.3   | 0.487195724  | 9.49E-24 | postive  |
| BIRC6    | AL021707.3   | 0.456497738  | 1.06E-20 | postive  |
| IKBKB    | AL021707.3   | 0.408006181  | 1.78E-16 | postive  |
| TSC2     | AL021707.3   | 0.464896215  | 1.66E-21 | postive  |
| ITGA3    | LINP1        | 0.411026925  | 1.02E-16 | postive  |
| GAPDH    | AC018809.2   | -0.426549063 | 5.19E-18 | negative |
| KLHL24   | AC018809.2   | 0.446721312  | 8.55E-20 | postive  |
| SIRT1    | AC018809.2   | 0.403127087  | 4.37E-16 | postive  |
| MAP1LC3  | AC012442.1   | 0.432407458  | 1.62E-18 | postive  |
| HSPA8    | AC135050.6   | -0.422314331 | 1.19E-17 | negative |
| PARP1    | PCED1B-AS1   | 0.547687079  | 9.77E-31 | postive  |
| RGS19    | PCED1B-AS1   | 0.820406428  | 1.41E-92 | postive  |
| CFLAR    | ADAMTSL4-AS1 | 0.446324631  | 9.30E-20 | postive  |
| IL24     | ADAMTSL4-AS1 | 0.522199758  | 1.27E-27 | postive  |
| CTSB     | AF131215.7   | 0.401385866  | 5.99E-16 | postive  |
| DAPK2    | AL133370.1   | 0.413999197  | 5.82E-17 | postive  |
| ATG16L2  | AC005104.1   | 0.562319307  | 1.19E-32 | postive  |
| ATG2B    | AC005104.1   | 0.547739149  | 9.62E-31 | postive  |

|         |              |             |          |         |
|---------|--------------|-------------|----------|---------|
| BIRC6   | AC005104.1   | 0.4967681   | 9.17E-25 | postive |
| IKBKB   | AC005104.1   | 0.463884762 | 2.08E-21 | postive |
| TSC1    | AC005104.1   | 0.53740529  | 1.90E-29 | postive |
| ITGA3   | ITGB1-DT     | 0.472156908 | 3.22E-22 | postive |
| ULK1    | STARD7-AS1   | 0.424381579 | 7.93E-18 | postive |
| LAMP1   | MCF2L-AS1    | 0.479136227 | 6.41E-23 | postive |
| BCL2    | MACORIS      | 0.434123225 | 1.15E-18 | postive |
| CXCR4   | MACORIS      | 0.431348216 | 2.00E-18 | postive |
| MAP1LC3 | MACORIS      | 0.408890772 | 1.51E-16 | postive |
| PARP1   | NUP153-AS1   | 0.427838974 | 4.02E-18 | postive |
| RGS19   | NUP153-AS1   | 0.526730661 | 3.72E-28 | postive |
| CTSD    | AC068580.1   | 0.639706238 | 1.51E-44 | postive |
| SPNS1   | AC068580.1   | 0.400753144 | 6.71E-16 | postive |
| ATG16L2 | AC117500.2   | 0.548826756 | 6.99E-31 | postive |
| CFLAR   | AC117500.2   | 0.410281778 | 1.17E-16 | postive |
| BCL2    | AC010226.1   | 0.526172083 | 4.34E-28 | postive |
| CXCR4   | AC010226.1   | 0.430975806 | 2.16E-18 | postive |
| HSPB8   | AC010226.1   | 0.411345311 | 9.59E-17 | postive |
| ITPR1   | AC010226.1   | 0.478366611 | 7.68E-23 | postive |
| FOXO3   | TRAF3IP2-AS1 | 0.512005059 | 1.90E-26 | postive |
| ATG16L2 | AC116913.1   | 0.517578738 | 4.39E-27 | postive |
| RAC1    | MIOS-DT      | 0.493505562 | 2.05E-24 | postive |
| ARSB    | AP001189.1   | 0.535160524 | 3.58E-29 | postive |
| BCL2    | AP001189.1   | 0.479809159 | 5.48E-23 | postive |
| DLC1    | AP001189.1   | 0.618085608 | 6.89E-41 | postive |
| ITPR1   | AP001189.1   | 0.562702162 | 1.06E-32 | postive |
| PEA15   | AP001189.1   | 0.414438651 | 5.36E-17 | postive |
| ZFYVE1  | AP001189.1   | 0.452776057 | 2.36E-20 | postive |
| ATG16L2 | AL049869.2   | 0.590819116 | 1.17E-36 | postive |
| ATG2B   | AL049869.2   | 0.479802993 | 5.49E-23 | postive |
| BIRC6   | AL049869.2   | 0.4260735   | 5.69E-18 | postive |
| IKBKB   | AL049869.2   | 0.419693453 | 1.97E-17 | postive |
| TSC1    | AL049869.2   | 0.42051383  | 1.68E-17 | postive |
| EEF2K   | AC026904.1   | 0.407610157 | 1.92E-16 | postive |
| PARP1   | AC026904.1   | 0.655478319 | 2.08E-47 | postive |
| RGS19   | AC026904.1   | 0.787669549 | 1.81E-80 | postive |
| EGFR    | EGFR-AS1     | 0.612325581 | 5.83E-40 | postive |
| ATG16L2 | PABPC4-AS1   | 0.442700907 | 1.98E-19 | postive |
| BIRC6   | PABPC4-AS1   | 0.49843512  | 6.06E-25 | postive |
| DLC1    | NALT1        | 0.570075132 | 1.06E-33 | postive |
| GABARAP | NALT1        | 0.416574754 | 3.57E-17 | postive |
| HSPB8   | NALT1        | 0.818644521 | 7.26E-92 | postive |
| ITPR1   | NALT1        | 0.479892291 | 5.37E-23 | postive |
| NRG2    | NALT1        | 0.456260232 | 1.11E-20 | postive |

|         |             |              |          |          |
|---------|-------------|--------------|----------|----------|
| ULK2    | NALT1       | 0.476066618  | 1.31E-22 | postive  |
| RB1CC1  | UBR5-AS1    | 0.408518542  | 1.62E-16 | postive  |
| BCL2    | LINC01934   | 0.502453546  | 2.21E-25 | postive  |
| CCR2    | LINC01934   | 0.511001516  | 2.47E-26 | postive  |
| CFLAR   | LINC01934   | 0.460730629  | 4.19E-21 | postive  |
| CXCR4   | LINC01934   | 0.578742886  | 6.52E-35 | postive  |
| MAP1LC3 | LINC01934   | 0.484910369  | 1.64E-23 | postive  |
| PRKCQ   | LINC01934   | 0.421378408  | 1.42E-17 | postive  |
| ATG16L2 | ZKSCAN2-DT  | 0.447912164  | 6.65E-20 | postive  |
| BAK1    | AC024075.2  | -0.405063178 | 3.07E-16 | negative |
| BCL2    | AC024075.2  | 0.407244784  | 2.05E-16 | postive  |
| EIF4G1  | AC024075.2  | -0.425581984 | 6.27E-18 | negative |
| P4HB    | AC024075.2  | -0.431319149 | 2.01E-18 | negative |
| ATG16L2 | GABPB1-AS1  | 0.541425413  | 6.03E-30 | postive  |
| PEA15   | AL390719.2  | -0.423435435 | 9.54E-18 | negative |
| ARSB    | AC104083.1  | 0.567415894  | 2.45E-33 | postive  |
| ATIC    | AC104083.1  | -0.419139301 | 2.19E-17 | negative |
| BCL2    | AC104083.1  | 0.527223473  | 3.25E-28 | postive  |
| BIRC5   | AC104083.1  | -0.454042661 | 1.80E-20 | negative |
| DLC1    | AC104083.1  | 0.73534431   | 5.29E-65 | postive  |
| GABARAP | AC104083.1  | 0.46687984   | 1.07E-21 | postive  |
| HDAC1   | AC104083.1  | -0.403833249 | 3.84E-16 | negative |
| HSPA5   | AC104083.1  | -0.400248382 | 7.35E-16 | negative |
| HSPB8   | AC104083.1  | 0.620500229  | 2.78E-41 | postive  |
| ITGB1   | AC104083.1  | 0.502555756  | 2.15E-25 | postive  |
| ITPR1   | AC104083.1  | 0.716474715  | 2.68E-60 | postive  |
| P4HB    | AC104083.1  | -0.408149321 | 1.74E-16 | negative |
| PEA15   | AC104083.1  | 0.507810884  | 5.64E-26 | postive  |
| ULK2    | AC104083.1  | 0.513924858  | 1.15E-26 | postive  |
| ZFYVE1  | AC104083.1  | 0.447091355  | 7.91E-20 | postive  |
| TSC2    | Z92544.1    | 0.434010977  | 1.17E-18 | postive  |
| CFLAR   | BCL2L1-AS1  | 0.467869719  | 8.53E-22 | postive  |
| PARP1   | AC017104.1  | 0.492908359  | 2.37E-24 | postive  |
| RGS19   | AC017104.1  | 0.674455113  | 4.36E-51 | postive  |
| ATG16L2 | ANKRD44-IT1 | 0.521081699  | 1.72E-27 | postive  |
| BCL2    | ANKRD44-IT1 | 0.617070907  | 1.01E-40 | postive  |
| CXCR4   | ANKRD44-IT1 | 0.597950177  | 1.00E-37 | postive  |
| ITPR1   | ANKRD44-IT1 | 0.428871562  | 3.28E-18 | postive  |
| HSPB8   | AL355607.1  | 0.433387852  | 1.33E-18 | postive  |
| ATG16L2 | AC008735.1  | 0.51582242   | 6.99E-27 | postive  |
| BIRC6   | AC008735.1  | 0.416384549  | 3.71E-17 | postive  |
| TSC1    | AC008735.1  | 0.406167422  | 2.50E-16 | postive  |
| GOPC    | AP001486.2  | 0.404627341  | 3.32E-16 | postive  |
| P4HB    | AP001486.2  | -0.420270669 | 1.76E-17 | negative |

|          |             |             |          |         |
|----------|-------------|-------------|----------|---------|
| PIK3C3   | AP001486.2  | 0.451093991 | 3.39E-20 | postive |
| ULK2     | AP001486.2  | 0.400312038 | 7.27E-16 | postive |
| NLRC4    | AC114284.1  | 0.405708451 | 2.72E-16 | postive |
| ULK1     | RAMP2-AS1   | 0.424211357 | 8.20E-18 | postive |
| ATG16L2  | AC002128.1  | 0.450863317 | 3.56E-20 | postive |
| ATG16L2  | AC022973.5  | 0.408926873 | 1.50E-16 | postive |
| TSC1     | AC005332.3  | 0.401837927 | 5.52E-16 | postive |
| EIF4EBP1 | IDH1-AS1    | 0.449142432 | 5.13E-20 | postive |
| ARSB     | DUBR        | 0.482159323 | 3.15E-23 | postive |
| DLC1     | DUBR        | 0.522037374 | 1.33E-27 | postive |
| GABARAP  | DUBR        | 0.426564468 | 5.17E-18 | postive |
| HSPB8    | DUBR        | 0.463803632 | 2.12E-21 | postive |
| ITGB1    | DUBR        | 0.462512429 | 2.83E-21 | postive |
| ITPR1    | DUBR        | 0.487920093 | 7.97E-24 | postive |
| ULK2     | DUBR        | 0.553528038 | 1.73E-31 | postive |
| ZFYVE1   | DUBR        | 0.410691175 | 1.08E-16 | postive |
| ARSB     | AP000808.1  | 0.462901568 | 2.59E-21 | postive |
| BCL2     | AP000808.1  | 0.439211962 | 4.07E-19 | postive |
| DLC1     | AP000808.1  | 0.567993319 | 2.04E-33 | postive |
| GABARAP  | AP000808.1  | 0.420428655 | 1.71E-17 | postive |
| HSPB8    | AP000808.1  | 0.640613283 | 1.04E-44 | postive |
| ITPR1    | AP000808.1  | 0.583816436 | 1.23E-35 | postive |
| PEA15    | AP000808.1  | 0.439293845 | 4.00E-19 | postive |
| PINK1    | AP000808.1  | 0.418268022 | 2.59E-17 | postive |
| ULK2     | AP000808.1  | 0.444466262 | 1.37E-19 | postive |
| PIK3C3   | ZKSCAN7-AS1 | 0.440739716 | 2.97E-19 | postive |
| RAF1     | ZKSCAN7-AS1 | 0.431412876 | 1.98E-18 | postive |
| TSC1     | ZKSCAN7-AS1 | 0.401854847 | 5.50E-16 | postive |
| TP63     | C5orf66-AS1 | 0.504300832 | 1.38E-25 | postive |
| ATG16L2  | LINC00996   | 0.44618125  | 9.58E-20 | postive |
| BCL2     | LINC00996   | 0.573851516 | 3.17E-34 | postive |
| CCR2     | LINC00996   | 0.618511545 | 5.87E-41 | postive |
| CFLAR    | LINC00996   | 0.494535009 | 1.59E-24 | postive |
| CXCR4    | LINC00996   | 0.595150547 | 2.64E-37 | postive |
| ITPR1    | LINC00996   | 0.462684625 | 2.72E-21 | postive |
| NLRC4    | LINC00996   | 0.437581192 | 5.68E-19 | postive |
| PRKCQ    | LINC00996   | 0.416632096 | 3.54E-17 | postive |
| ATG16L2  | LINC00528   | 0.507094622 | 6.78E-26 | postive |
| BCL2     | LINC00528   | 0.492292565 | 2.76E-24 | postive |
| CCR2     | LINC00528   | 0.407804904 | 1.85E-16 | postive |
| CFLAR    | LINC00528   | 0.444878731 | 1.26E-19 | postive |
| CXCR4    | LINC00528   | 0.570291638 | 9.88E-34 | postive |
| ARSA     | BX537318.1  | 0.44647734  | 9.00E-20 | postive |
| ATG16L2  | AC005154.4  | 0.446988408 | 8.08E-20 | postive |

|         |            |              |          |          |
|---------|------------|--------------|----------|----------|
| BCL2    | AC022034.4 | 0.424303689  | 8.05E-18 | postive  |
| DLC1    | AC022034.4 | 0.489195384  | 5.86E-24 | postive  |
| HSPB8   | AC022034.4 | 0.551681422  | 3.00E-31 | postive  |
| ITPR1   | AC022034.4 | 0.565504413  | 4.45E-33 | postive  |
| ARSB    | PAXIP1-AS2 | 0.425495517  | 6.38E-18 | postive  |
| BCL2    | PAXIP1-AS2 | 0.522869575  | 1.06E-27 | postive  |
| CFLAR   | PAXIP1-AS2 | 0.490463558  | 4.31E-24 | postive  |
| ITPR1   | PAXIP1-AS2 | 0.529282043  | 1.85E-28 | postive  |
| ATG16L2 | AL354733.3 | 0.501623415  | 2.72E-25 | postive  |
| ATG2B   | AL354733.3 | 0.427226657  | 4.54E-18 | postive  |
| TSC1    | AL354733.3 | 0.561061388  | 1.76E-32 | postive  |
| ATG2B   | AL034550.1 | 0.426675849  | 5.06E-18 | postive  |
| TSC1    | AL034550.1 | 0.45840601   | 6.98E-21 | postive  |
| PEA15   | AL133415.1 | 0.449718461  | 4.54E-20 | postive  |
| ATG16L2 | AL513218.1 | 0.47256422   | 2.94E-22 | postive  |
| KLHL24  | AC069224.1 | 0.458188126  | 7.32E-21 | postive  |
| ATG16L2 | AC018695.4 | 0.442391612  | 2.11E-19 | postive  |
| ATG2B   | AC018695.4 | 0.413918654  | 5.91E-17 | postive  |
| BIRC6   | AC018695.4 | 0.424735833  | 7.40E-18 | postive  |
| MAP2K7  | CENATAC-DT | 0.464757774  | 1.72E-21 | postive  |
| PARP1   | CENATAC-DT | 0.511199826  | 2.35E-26 | postive  |
| PEX3    | CENATAC-DT | 0.428735129  | 3.37E-18 | postive  |
| TP73    | CENATAC-DT | 0.416906406  | 3.36E-17 | postive  |
| BAK1    | AP003486.1 | -0.408378054 | 1.67E-16 | negative |
| BCL2    | AP003486.1 | 0.443330236  | 1.74E-19 | postive  |
| BIRC5   | AP003486.1 | -0.435394129 | 8.87E-19 | negative |
| DLC1    | AP003486.1 | 0.538435063  | 1.42E-29 | postive  |
| GABARAP | AP003486.1 | 0.410360559  | 1.15E-16 | postive  |
| HSPB8   | AP003486.1 | 0.527589654  | 2.94E-28 | postive  |
| ITPR1   | AP003486.1 | 0.548117328  | 8.61E-31 | postive  |
| P4HB    | AP003486.1 | -0.440638196 | 3.04E-19 | negative |
| ULK2    | AP003486.1 | 0.491631024  | 3.24E-24 | postive  |
| ARSB    | AL109741.1 | 0.400867272  | 6.58E-16 | postive  |
| BCL2    | AL109741.1 | 0.501147468  | 3.07E-25 | postive  |
| CXCR4   | AL109741.1 | 0.476914114  | 1.08E-22 | postive  |
| DLC1    | AL109741.1 | 0.490749788  | 4.02E-24 | postive  |
| ITPR1   | AL109741.1 | 0.557264092  | 5.61E-32 | postive  |
| MAP1LC3 | AL109741.1 | 0.515277335  | 8.07E-27 | postive  |
| NKX2-3  | AL109741.1 | 0.42645686   | 5.28E-18 | postive  |
| PEA15   | AL109741.1 | 0.429273605  | 3.03E-18 | postive  |
| EIF2AK2 | NRIR       | 0.481295876  | 3.86E-23 | postive  |
| MAP1LC3 | AC002306.1 | 0.515518764  | 7.57E-27 | postive  |
| GAPDH   | AC105020.1 | -0.436367131 | 7.28E-19 | negative |
| HSPA8   | MALAT1     | -0.465239057 | 1.54E-21 | negative |



|         |              |              |          |          |
|---------|--------------|--------------|----------|----------|
| ARSB    | SNHG14       | 0.404039878  | 3.70E-16 | postive  |
| BCL2    | SNHG14       | 0.436528976  | 7.04E-19 | postive  |
| DLC1    | SNHG14       | 0.516093945  | 6.51E-27 | postive  |
| GABARAP | SNHG14       | 0.421009218  | 1.53E-17 | postive  |
| HSPB8   | SNHG14       | 0.593791817  | 4.22E-37 | postive  |
| ITPR1   | SNHG14       | 0.59745208   | 1.19E-37 | postive  |
| NRG2    | SNHG14       | 0.450073347  | 4.21E-20 | postive  |
| ULK2    | SNHG14       | 0.47831775   | 7.77E-23 | postive  |
| CFLAR   | ADAMTSL4-AS2 | 0.451365638  | 3.20E-20 | postive  |
| IL24    | ADAMTSL4-AS2 | 0.485806351  | 1.32E-23 | postive  |
| ATG2B   | DCUN1D2-AS   | 0.418098608  | 2.67E-17 | postive  |
| MAP1LC3 | L3MBTL4-AS1  | 0.493642913  | 1.98E-24 | postive  |
| FKBP1B  | ARHGAP5-AS1  | 0.46076039   | 4.16E-21 | postive  |
| ATG2B   | AC000123.1   | 0.438904575  | 4.34E-19 | postive  |
| BIRC5   | AC083880.1   | 0.414831722  | 4.98E-17 | postive  |
| ATG16L2 | AL109914.1   | 0.427824464  | 4.03E-18 | postive  |
| BCL2    | AL109914.1   | 0.575893049  | 1.64E-34 | postive  |
| CXCR4   | AL109914.1   | 0.571322691  | 7.12E-34 | postive  |
| MAP1LC3 | AL109914.1   | 0.488304539  | 7.26E-24 | postive  |
| CDKN2A  | PIK3CD-AS2   | 0.40012728   | 7.52E-16 | postive  |
| ATG16L2 | AC090589.3   | 0.526915806  | 3.54E-28 | postive  |
| ATG16L2 | AC068790.3   | 0.414003762  | 5.82E-17 | postive  |
| ATG2B   | AC068790.3   | 0.470814301  | 4.38E-22 | postive  |
| BIRC6   | AC068790.3   | 0.456428657  | 1.07E-20 | postive  |
| GOPC    | AC068790.3   | 0.417088788  | 3.24E-17 | postive  |
| TSC1    | AC068790.3   | 0.523809807  | 8.25E-28 | postive  |
| GNAI3   | AL391121.1   | -0.419959022 | 1.87E-17 | negative |
| PINK1   | AL391121.1   | 0.537011756  | 2.12E-29 | postive  |
| P4HB    | SLC16A1-AS1  | -0.429660945 | 2.80E-18 | negative |
| ATIC    | GSN-AS1      | -0.431566893 | 1.92E-18 | negative |
| BCL2    | GSN-AS1      | 0.509791452  | 3.38E-26 | postive  |
| BIRC5   | GSN-AS1      | -0.433578402 | 1.28E-18 | negative |
| CFLAR   | GSN-AS1      | 0.449774609  | 4.48E-20 | postive  |
| DLC1    | GSN-AS1      | 0.52321338   | 9.69E-28 | postive  |
| HSPB8   | GSN-AS1      | 0.488286293  | 7.30E-24 | postive  |
| ITPR1   | GSN-AS1      | 0.587646906  | 3.41E-36 | postive  |
| ZFYVE1  | GSN-AS1      | 0.447563051  | 7.16E-20 | postive  |
| ATG16L2 | AP002907.1   | 0.469895013  | 5.40E-22 | postive  |
| ATG16L2 | TRG-AS1      | 0.483179109  | 2.47E-23 | postive  |
| BCL2    | TRG-AS1      | 0.592058533  | 7.64E-37 | postive  |
| CCR2    | TRG-AS1      | 0.614545878  | 2.57E-40 | postive  |
| CFLAR   | TRG-AS1      | 0.568527006  | 1.72E-33 | postive  |
| CXCR4   | TRG-AS1      | 0.590684414  | 1.22E-36 | postive  |
| FAS     | TRG-AS1      | 0.430960459  | 2.16E-18 | postive  |

|          |            |              |          |          |
|----------|------------|--------------|----------|----------|
| IFNG     | TRG-AS1    | 0.468629205  | 7.19E-22 | postive  |
| ITPR1    | TRG-AS1    | 0.432030995  | 1.75E-18 | postive  |
| NFKB1    | TRG-AS1    | 0.42181594   | 1.31E-17 | postive  |
| NLRC4    | TRG-AS1    | 0.469305505  | 6.17E-22 | postive  |
| PRKCQ    | TRG-AS1    | 0.467933376  | 8.41E-22 | postive  |
| HSPA8    | AC078777.1 | -0.400210701 | 7.40E-16 | negative |
| DLC1     | AC036108.3 | 0.534122744  | 4.80E-29 | postive  |
| HSPB8    | AC036108.3 | 0.740115739  | 2.95E-66 | postive  |
| ITGB1    | AC036108.3 | 0.478515832  | 7.41E-23 | postive  |
| ITPR1    | AC036108.3 | 0.461812346  | 3.30E-21 | postive  |
| ULK2     | AC036108.3 | 0.423160175  | 1.01E-17 | postive  |
| ATG16L2  | AC108010.1 | 0.53749169   | 1.85E-29 | postive  |
| ATG2B    | AC108010.1 | 0.532227324  | 8.15E-29 | postive  |
| BCL2     | AC108010.1 | 0.416071575  | 3.93E-17 | postive  |
| BIRC6    | AC108010.1 | 0.585986511  | 5.95E-36 | postive  |
| CFLAR    | AC108010.1 | 0.496731232  | 9.25E-25 | postive  |
| IKBKB    | AC108010.1 | 0.447938735  | 6.62E-20 | postive  |
| ITPR1    | AC108010.1 | 0.415594976  | 4.31E-17 | postive  |
| TSC1     | AC108010.1 | 0.49067898   | 4.09E-24 | postive  |
| TSC2     | AC108010.1 | 0.518877814  | 3.11E-27 | postive  |
| ATG16L2  | AL022328.1 | 0.579105911  | 5.79E-35 | postive  |
| ATG2B    | AL022328.1 | 0.424375869  | 7.94E-18 | postive  |
| TSC2     | AL022328.1 | 0.428567266  | 3.48E-18 | postive  |
| PINK1    | SCAT2      | -0.45197096  | 2.81E-20 | negative |
| SESN2    | AC004596.1 | 0.419615046  | 2.00E-17 | postive  |
| ATG16L2  | AC022400.4 | 0.405447397  | 2.86E-16 | postive  |
| SIRT1    | AC022400.4 | 0.468723173  | 7.04E-22 | postive  |
| ATG4D    | AL355490.1 | 0.410564989  | 1.11E-16 | postive  |
| RGS19    | RFX5-AS1   | 0.596573649  | 1.61E-37 | postive  |
| HSP90AB1 | POLH-AS1   | 0.431703881  | 1.86E-18 | postive  |
| VEGFA    | POLH-AS1   | 0.501799675  | 2.61E-25 | postive  |
| DLC1     | AC011472.4 | 0.45864602   | 6.62E-21 | postive  |
| HSPA5    | AC011472.4 | -0.403618069 | 3.99E-16 | negative |
| HSPB8    | AC011472.4 | 0.663465499  | 6.35E-49 | postive  |
| ITPR1    | AC011472.4 | 0.451002315  | 3.45E-20 | postive  |
| P4HB     | AC011472.4 | -0.431382317 | 1.99E-18 | negative |
| ULK2     | AC011472.4 | 0.401209818  | 6.18E-16 | postive  |
| MAP1LC3  | UBOX5-AS1  | 0.436264384  | 7.43E-19 | postive  |
| ATG16L2  | PSMA3-AS1  | 0.536407407  | 2.52E-29 | postive  |
| MLST8    | PSMA3-AS1  | -0.404022794 | 3.71E-16 | negative |
| P4HB     | PSMA3-AS1  | -0.401776286 | 5.58E-16 | negative |
| TSC1     | PSMA3-AS1  | 0.440061212  | 3.42E-19 | postive  |
| ATG2B    | NADK2-AS1  | 0.546509665  | 1.38E-30 | postive  |
| BIRC6    | NADK2-AS1  | 0.460812189  | 4.12E-21 | postive  |

|          |             |              |          |          |
|----------|-------------|--------------|----------|----------|
| GOPC     | NADK2-AS1   | 0.457957966  | 7.70E-21 | postive  |
| TSC1     | NADK2-AS1   | 0.410686136  | 1.08E-16 | postive  |
| MAP1LC3  | USP12-AS2   | 0.517456527  | 4.53E-27 | postive  |
| MAPK8IP1 | LINC01719   | 0.442405037  | 2.11E-19 | postive  |
| BCL2     | ANKRD44-AS1 | 0.509614716  | 3.54E-26 | postive  |
| CXCR4    | ANKRD44-AS1 | 0.631535929  | 3.94E-43 | postive  |
| MAP1LC3  | ANKRD44-AS1 | 0.522678797  | 1.12E-27 | postive  |
| MAP1LC3  | AC022167.3  | 0.477277226  | 9.90E-23 | postive  |
| ATG16L2  | AC068790.7  | 0.468693487  | 7.09E-22 | postive  |
| GAPDH    | AC068790.7  | -0.406541497 | 2.34E-16 | negative |
| TSC1     | AC068790.7  | 0.401195308  | 6.20E-16 | postive  |
| FOXO3    | FAM198B-AS1 | 0.416896928  | 3.36E-17 | postive  |
| TSC1     | AL122010.1  | 0.426402884  | 5.34E-18 | postive  |
| ULK3     | AC068338.2  | 0.447448247  | 7.34E-20 | postive  |
| ATG16L2  | AC015911.3  | 0.402712721  | 4.71E-16 | postive  |
| BCL2     | AC015911.3  | 0.5292291    | 1.87E-28 | postive  |
| CCR2     | AC015911.3  | 0.718310091  | 9.71E-61 | postive  |
| CFLAR    | AC015911.3  | 0.598082293  | 9.55E-38 | postive  |
| CX3CL1   | AC015911.3  | 0.460134597  | 4.78E-21 | postive  |
| CXCR4    | AC015911.3  | 0.457555928  | 8.40E-21 | postive  |
| ITPR1    | AC015911.3  | 0.414087834  | 5.73E-17 | postive  |
| NFKB1    | AC015911.3  | 0.419461114  | 2.06E-17 | postive  |
| NLRC4    | AC015911.3  | 0.416223528  | 3.82E-17 | postive  |
| PRKCQ    | AC015911.3  | 0.458076773  | 7.50E-21 | postive  |
| ATG5     | LINC02526   | 0.516891624  | 5.27E-27 | postive  |
| DDIT3    | ALG13-AS1   | 0.810163113  | 1.55E-88 | postive  |
| ATG16L2  | AP002812.5  | 0.419620957  | 2.00E-17 | postive  |
| ATG16L2  | AL022328.2  | 0.547492044  | 1.03E-30 | postive  |
| BIRC6    | AC253536.3  | 0.411402279  | 9.49E-17 | postive  |
| ATG16L2  | AC090772.1  | 0.456348871  | 1.09E-20 | postive  |
| BCL2     | AC090772.1  | 0.406363474  | 2.42E-16 | postive  |
| MAP1LC3  | AC090772.1  | 0.439383787  | 3.93E-19 | postive  |
| BIRC6    | AC018653.3  | 0.472939644  | 2.69E-22 | postive  |
| ATIC     | SNHG1       | 0.420452754  | 1.70E-17 | postive  |
| PINK1    | SNHG1       | -0.437215223 | 6.12E-19 | negative |
| BAK1     | NPTN-IT1    | -0.444166977 | 1.46E-19 | negative |
| HSPB8    | NPTN-IT1    | 0.419820144  | 1.92E-17 | postive  |
| P4HB     | NPTN-IT1    | -0.431287964 | 2.03E-18 | negative |
| ATG16L2  | PRKCZ-AS1   | 0.470117361  | 5.13E-22 | postive  |
| ATG2B    | PRKCZ-AS1   | 0.40079753   | 6.66E-16 | postive  |
| PRKCD    | AL158206.1  | 0.404241079  | 3.56E-16 | postive  |
| RAB24    | AP003119.2  | 0.422791286  | 1.08E-17 | postive  |
| PEA15    | SNHG3       | -0.423322759 | 9.75E-18 | negative |
| PARP1    | MYOSLID     | 0.59111551   | 1.05E-36 | postive  |

|         |            |              |          |          |
|---------|------------|--------------|----------|----------|
| RGS19   | MYOSLID    | 0.736674323  | 2.38E-65 | postive  |
| BAG3    | UNC5B-AS1  | 0.520404316  | 2.07E-27 | postive  |
| DNAJB1  | UNC5B-AS1  | 0.410910892  | 1.04E-16 | postive  |
| TP63    | KTN1-AS1   | 0.486766915  | 1.05E-23 | postive  |
| ARSB    | AC005670.3 | 0.528665643  | 2.19E-28 | postive  |
| BCL2    | AC005670.3 | 0.475659806  | 1.44E-22 | postive  |
| DLC1    | AC005670.3 | 0.480408057  | 4.76E-23 | postive  |
| HSPB8   | AC005670.3 | 0.519499187  | 2.63E-27 | postive  |
| ITPR1   | AC005670.3 | 0.554743075  | 1.20E-31 | postive  |
| PEA15   | AC005670.3 | 0.421810545  | 1.31E-17 | postive  |
| PINK1   | AC005670.3 | 0.40080605   | 6.65E-16 | postive  |
| ULK2    | AC005670.3 | 0.464093531  | 1.99E-21 | postive  |
| PARP1   | AC007879.3 | 0.434186435  | 1.13E-18 | postive  |
| RGS19   | AC007879.3 | 0.559072708  | 3.23E-32 | postive  |
| MAP1LC3 | AC135178.4 | 0.409161545  | 1.44E-16 | postive  |
| HGS     | AC124283.2 | 0.448011722  | 6.52E-20 | postive  |
| ATG16L2 | PTOV1-AS2  | 0.605850698  | 6.11E-39 | postive  |
| IKBKB   | PTOV1-AS2  | 0.439115297  | 4.15E-19 | postive  |
| ATG16L2 | AL513008.1 | 0.538668676  | 1.33E-29 | postive  |
| BCL2    | AL513008.1 | 0.59836846   | 8.64E-38 | postive  |
| CFLAR   | AL513008.1 | 0.431680466  | 1.87E-18 | postive  |
| CXCR4   | AL513008.1 | 0.552759277  | 2.18E-31 | postive  |
| ITPR1   | AL513008.1 | 0.46591045   | 1.33E-21 | postive  |
| BCL2    | AC007406.4 | 0.473598728  | 2.32E-22 | postive  |
| DLC1    | PGM5-AS1   | 0.585338966  | 7.39E-36 | postive  |
| GABARAP | PGM5-AS1   | 0.447095175  | 7.90E-20 | postive  |
| HSPB8   | PGM5-AS1   | 0.809260124  | 3.41E-88 | postive  |
| ITPR1   | PGM5-AS1   | 0.535688963  | 3.09E-29 | postive  |
| NRG2    | PGM5-AS1   | 0.453754968  | 1.91E-20 | postive  |
| ULK2    | PGM5-AS1   | 0.459728192  | 5.22E-21 | postive  |
| ATG16L2 | AC008870.2 | 0.509432404  | 3.71E-26 | postive  |
| TSC1    | AC008870.2 | 0.40558143   | 2.79E-16 | postive  |
| ATG2B   | AC098869.2 | 0.442477468  | 2.08E-19 | postive  |
| BIRC6   | AC098869.2 | 0.445363959  | 1.14E-19 | postive  |
| EIF2AK3 | AC098869.2 | 0.411312545  | 9.65E-17 | postive  |
| IKBKB   | AC098869.2 | 0.4542084    | 1.74E-20 | postive  |
| PEA15   | AC098869.2 | -0.439098757 | 4.17E-19 | negative |
| BCL2    | ACTA2-AS1  | 0.42268515   | 1.10E-17 | postive  |
| BIRC5   | ACTA2-AS1  | -0.405831869 | 2.66E-16 | negative |
| DLC1    | ACTA2-AS1  | 0.638295704  | 2.67E-44 | postive  |
| GABARAP | ACTA2-AS1  | 0.495231702  | 1.34E-24 | postive  |
| HDAC1   | ACTA2-AS1  | -0.403992777 | 3.73E-16 | negative |
| HSPA5   | ACTA2-AS1  | -0.421287224 | 1.45E-17 | negative |
| HSPB8   | ACTA2-AS1  | 0.814357579  | 3.67E-90 | postive  |

|          |            |              |          |          |
|----------|------------|--------------|----------|----------|
| ITGB1    | ACTA2-AS1  | 0.443480536  | 1.68E-19 | postive  |
| ITPR1    | ACTA2-AS1  | 0.615046591  | 2.14E-40 | postive  |
| NRG2     | ACTA2-AS1  | 0.453637063  | 1.96E-20 | postive  |
| P4HB     | ACTA2-AS1  | -0.402799458 | 4.63E-16 | negative |
| PEA15    | ACTA2-AS1  | 0.413414911  | 6.50E-17 | postive  |
| ULK2     | ACTA2-AS1  | 0.527992928  | 2.63E-28 | postive  |
| MAPK8IP1 | ZNF337-AS1 | 0.413440647  | 6.47E-17 | postive  |
| ATG16L2  | AL031846.2 | 0.619376837  | 4.24E-41 | postive  |
| BCL2     | AL031846.2 | 0.662823811  | 8.43E-49 | postive  |
| CFLAR    | AL031846.2 | 0.511861077  | 1.98E-26 | postive  |
| CXCR4    | AL031846.2 | 0.480881989  | 4.26E-23 | postive  |
| HSPB8    | AL031846.2 | 0.404038899  | 3.70E-16 | postive  |
| ITPR1    | AL031846.2 | 0.620996711  | 2.30E-41 | postive  |
| ULK2     | AL031846.2 | 0.438616138  | 4.60E-19 | postive  |
| SPNS1    | AC120114.1 | 0.564070325  | 6.95E-33 | postive  |
| ATG16L2  | AC090948.2 | 0.568531868  | 1.72E-33 | postive  |
| ATG2B    | AC090948.2 | 0.420233824  | 1.77E-17 | postive  |
| BCL2     | AC090948.2 | 0.553283167  | 1.86E-31 | postive  |
| BIRC6    | AC090948.2 | 0.49882685   | 5.49E-25 | postive  |
| CFLAR    | AC090948.2 | 0.479762988  | 5.54E-23 | postive  |
| CXCR4    | AC090948.2 | 0.452066202  | 2.75E-20 | postive  |
| IKBKB    | AC090948.2 | 0.41789051   | 2.78E-17 | postive  |
| ITPR1    | AC090948.2 | 0.43749785   | 5.78E-19 | postive  |
| ATG16L2  | AP002340.1 | 0.474989361  | 1.68E-22 | postive  |
| UVRAG    | AP002340.1 | 0.467840146  | 8.59E-22 | postive  |
| ARSB     | AC008808.2 | 0.46607667   | 1.28E-21 | postive  |
| ATIC     | AC008808.2 | -0.403242228 | 4.28E-16 | negative |
| BCL2     | AC008808.2 | 0.567001029  | 2.79E-33 | postive  |
| BIRC5    | AC008808.2 | -0.407978716 | 1.79E-16 | negative |
| DLC1     | AC008808.2 | 0.609404341  | 1.69E-39 | postive  |
| HSPA5    | AC008808.2 | -0.425481032 | 6.40E-18 | negative |
| HSPB8    | AC008808.2 | 0.600627895  | 3.91E-38 | postive  |
| ITPR1    | AC008808.2 | 0.678584871  | 6.35E-52 | postive  |
| PEA15    | AC008808.2 | 0.514813806  | 9.12E-27 | postive  |
| ULK2     | AC008808.2 | 0.426600259  | 5.13E-18 | postive  |
| ZFYVE1   | AC008808.2 | 0.409489239  | 1.36E-16 | postive  |
| ATG16L2  | AC011379.2 | 0.42756499   | 4.24E-18 | postive  |
| RAC1     | MPRIP-AS1  | 0.409668284  | 1.31E-16 | postive  |
| PELP1    | AL109615.3 | 0.512268721  | 1.78E-26 | postive  |
| VEGFA    | AL109615.3 | 0.591268536  | 1.00E-36 | postive  |
| ATG16L2  | AC124283.3 | 0.444846488  | 1.27E-19 | postive  |
| RPS6KB1  | AC124283.3 | 0.405708561  | 2.72E-16 | postive  |
| ATG16L2  | AC011825.2 | 0.459792991  | 5.15E-21 | postive  |
| HSPA8    | AL138963.1 | -0.414564444 | 5.23E-17 | negative |

|         |            |              |          |          |
|---------|------------|--------------|----------|----------|
| BCL2    | AC006369.1 | 0.487514111  | 8.79E-24 | postive  |
| CXCR4   | AC006369.1 | 0.56787492   | 2.12E-33 | postive  |
| ATG16L2 | AC016405.1 | 0.408898073  | 1.51E-16 | postive  |
| BCL2    | PDE2A-AS2  | 0.40700524   | 2.15E-16 | postive  |
| CXCR4   | PDE2A-AS2  | 0.597676941  | 1.10E-37 | postive  |
| SPHK1   | AC134312.5 | 0.400964359  | 6.46E-16 | postive  |
| TBK1    | AC025423.1 | 0.429396542  | 2.95E-18 | postive  |
| DLC1    | AL133346.1 | 0.469862807  | 5.44E-22 | postive  |
| MAP1LC3 | AC007922.2 | 0.402413965  | 4.97E-16 | postive  |
| DAPK2   | VIPR1-AS1  | 0.457710286  | 8.12E-21 | postive  |
| ATG16L2 | AL021878.2 | 0.520384224  | 2.08E-27 | postive  |
| HIF1A   | LUCAT1     | 0.415837842  | 4.11E-17 | postive  |
| IL24    | LUCAT1     | 0.400022744  | 7.66E-16 | postive  |
| ATG2B   | AC112491.1 | -0.479515618 | 5.87E-23 | negative |
| BIRC6   | AC112491.1 | -0.428406702 | 3.59E-18 | negative |
| PIK3R4  | AC112491.1 | -0.422474012 | 1.15E-17 | negative |
| WDFY3   | AC112491.1 | -0.4362361   | 7.47E-19 | negative |
| ATG16L2 | AC090948.3 | 0.622130383  | 1.50E-41 | postive  |
| BCL2    | AC090948.3 | 0.436925997  | 6.50E-19 | postive  |
| CXCR4   | AC090948.3 | 0.464782328  | 1.71E-21 | postive  |
| IKBKB   | AC090948.3 | 0.403415599  | 4.14E-16 | postive  |
| TSC1    | AL590729.1 | 0.455883915  | 1.21E-20 | postive  |
| ATG16L2 | AC020913.1 | 0.501658828  | 2.70E-25 | postive  |
| BCL2    | AC020913.1 | 0.409257324  | 1.41E-16 | postive  |
| CFLAR   | AC020913.1 | 0.472144171  | 3.23E-22 | postive  |
| CTSB    | AF131215.4 | 0.406117528  | 2.53E-16 | postive  |
| DLC1    | BARX1-DT   | 0.63347814   | 1.83E-43 | postive  |
| GABARAP | BARX1-DT   | 0.513550501  | 1.27E-26 | postive  |
| HSPB8   | BARX1-DT   | 0.814860221  | 2.33E-90 | postive  |
| ITPR1   | BARX1-DT   | 0.585320832  | 7.44E-36 | postive  |
| NRG2    | BARX1-DT   | 0.504719178  | 1.24E-25 | postive  |
| PEA15   | BARX1-DT   | 0.440485261  | 3.13E-19 | postive  |
| ULK2    | BARX1-DT   | 0.486340008  | 1.16E-23 | postive  |
| TSC1    | AC010168.2 | 0.453315925  | 2.10E-20 | postive  |
| ATG16L2 | LINC01550  | 0.423634472  | 9.18E-18 | postive  |
| BCL2    | LINC01550  | 0.62393033   | 7.54E-42 | postive  |
| CXCR4   | LINC01550  | 0.635527085  | 8.10E-44 | postive  |
| ITPR1   | LINC01550  | 0.500295999  | 3.80E-25 | postive  |
| MAP1LC3 | LINC01550  | 0.527370315  | 3.12E-28 | postive  |
| ARSB    | PTPRN2-AS1 | 0.476917671  | 1.08E-22 | postive  |
| CCR2    | PTPRN2-AS1 | 0.60093392   | 3.51E-38 | postive  |
| CTSD    | PTPRN2-AS1 | 0.502311082  | 2.29E-25 | postive  |
| NLR4    | PTPRN2-AS1 | 0.579034883  | 5.93E-35 | postive  |
| BAK1    | AL049838.1 | -0.414481021 | 5.32E-17 | negative |

|         |            |              |          |          |
|---------|------------|--------------|----------|----------|
| DLC1    | AL049838.1 | 0.553758308  | 1.61E-31 | postive  |
| GABARAP | AL049838.1 | 0.525963203  | 4.59E-28 | postive  |
| HDAC1   | AL049838.1 | -0.411968705 | 8.53E-17 | negative |
| HSPB8   | AL049838.1 | 0.548482437  | 7.73E-31 | postive  |
| ITPR1   | AL049838.1 | 0.528520531  | 2.28E-28 | postive  |
| ULK2    | AL049838.1 | 0.480729538  | 4.41E-23 | postive  |
| BIRC5   | LINC01547  | 0.441646986  | 2.46E-19 | postive  |
| NPC1    | AC007996.1 | 0.414110806  | 5.70E-17 | postive  |
| PARP1   | AC136424.2 | 0.41266135   | 7.49E-17 | postive  |
| RGS19   | AC136424.2 | 0.626383477  | 2.94E-42 | postive  |
| IFNG    | AF124730.1 | 0.406299507  | 2.44E-16 | postive  |
| ATG16L2 | AC015853.1 | 0.437412593  | 5.88E-19 | postive  |
| DLC1    | AC009806.1 | 0.544265692  | 2.65E-30 | postive  |
| HSPB8   | AC009806.1 | 0.682357242  | 1.06E-52 | postive  |
| ITPR1   | AC009806.1 | 0.512185794  | 1.82E-26 | postive  |
| ULK2    | AC009806.1 | 0.432940886  | 1.45E-18 | postive  |
| BCL2    | AC008676.1 | 0.487736489  | 8.33E-24 | postive  |
| HSPB8   | AC008676.1 | 0.415948129  | 4.03E-17 | postive  |
| CFLAR   | AC139795.2 | 0.40396923   | 3.75E-16 | postive  |
| MAP1LC3 | LINC01985  | 0.400701705  | 6.78E-16 | postive  |
| ATG4D   | AC024575.1 | 0.419168148  | 2.18E-17 | postive  |
| MAP2K7  | AC024575.1 | 0.410641382  | 1.09E-16 | postive  |
| RB1CC1  | OTUD6B-AS1 | 0.414261368  | 5.54E-17 | postive  |
| ATG16L2 | AC092574.2 | 0.477693291  | 8.98E-23 | postive  |
| ATG16L2 | AC091185.1 | 0.448581217  | 5.78E-20 | postive  |
| BIRC6   | AC091185.1 | 0.409110589  | 1.45E-16 | postive  |
| IKBKB   | AC091185.1 | 0.570322691  | 9.78E-34 | postive  |
| TSC1    | AC091185.1 | 0.436945681  | 6.47E-19 | postive  |
| ARNT    | AC005332.6 | 0.407995734  | 1.79E-16 | postive  |
| PRKAR1A | AC005332.6 | 0.517768097  | 4.17E-27 | postive  |
| TSC1    | AC005332.6 | 0.410025315  | 1.23E-16 | postive  |
| WDFY3   | AC005332.6 | 0.505487199  | 1.02E-25 | postive  |
| ATG16L2 | AC093535.1 | 0.415108124  | 4.72E-17 | postive  |
| CFLAR   | AC093535.1 | 0.411545845  | 9.23E-17 | postive  |
| GABARAP | AC005165.1 | 0.47501134   | 1.67E-22 | postive  |
| HSPB8   | AC005165.1 | 0.599710926  | 5.40E-38 | postive  |
| ITPR1   | AC005165.1 | 0.442639231  | 2.01E-19 | postive  |
| ARSB    | LINC00294  | 0.420990862  | 1.53E-17 | postive  |
| BCL2    | LINC00294  | 0.403087251  | 4.40E-16 | postive  |
| DLC1    | LINC00294  | 0.489648475  | 5.25E-24 | postive  |
| HSPB8   | LINC00294  | 0.559781885  | 2.60E-32 | postive  |
| ITPR1   | LINC00294  | 0.453624626  | 1.97E-20 | postive  |
| P4HB    | LINC00294  | -0.437466183 | 5.82E-19 | negative |
| ULK2    | LINC00294  | 0.448981363  | 5.31E-20 | postive  |

|          |            |              |           |          |
|----------|------------|--------------|-----------|----------|
| ATG16L2  | AC127502.2 | 0.500001311  | 4.09E-25  | postive  |
| MAP1LC3  | AC130324.1 | 0.421527565  | 1.38E-17  | postive  |
| DLC1     | HAND2-AS1  | 0.654009688  | 3.90E-47  | postive  |
| GABARAP  | HAND2-AS1  | 0.430773225  | 2.25E-18  | postive  |
| HSPB8    | HAND2-AS1  | 0.854114987  | 6.02E-108 | postive  |
| ITGB1    | HAND2-AS1  | 0.449129652  | 5.14E-20  | postive  |
| ITPR1    | HAND2-AS1  | 0.553561405  | 1.71E-31  | postive  |
| NRG2     | HAND2-AS1  | 0.452426626  | 2.55E-20  | postive  |
| PEA15    | HAND2-AS1  | 0.427904834  | 3.97E-18  | postive  |
| ULK2     | HAND2-AS1  | 0.502913313  | 1.97E-25  | postive  |
| BCL2     | FTX        | 0.407937035  | 1.81E-16  | postive  |
| GAPDH    | FTX        | -0.444822464 | 1.27E-19  | negative |
| ITPR1    | FTX        | 0.461508966  | 3.53E-21  | postive  |
| BIRC5    | MRPL20-AS1 | 0.449823793  | 4.44E-20  | postive  |
| CAPN10   | MRPL20-AS1 | 0.410377317  | 1.15E-16  | postive  |
| HDAC6    | MRPL20-AS1 | 0.431803204  | 1.83E-18  | postive  |
| PELP1    | MRPL20-AS1 | 0.400119673  | 7.53E-16  | postive  |
| PEX14    | MRPL20-AS1 | 0.524193317  | 7.43E-28  | postive  |
| DLC1     | AL390955.2 | 0.420131066  | 1.81E-17  | postive  |
| HSPB8    | AL390955.2 | 0.446775881  | 8.45E-20  | postive  |
| MAPK8IP1 | AC010327.5 | 0.402290062  | 5.08E-16  | postive  |
| ATG16L2  | AC010618.3 | 0.448393992  | 6.01E-20  | postive  |
| P4HB     | AC073569.1 | -0.42187946  | 1.29E-17  | negative |
| CXCR4    | AC090825.1 | 0.41832446   | 2.56E-17  | postive  |
| ITPR1    | AC090825.1 | 0.435564904  | 8.56E-19  | postive  |
| ATG16L2  | AC135050.5 | 0.423153808  | 1.01E-17  | postive  |
| BCL2     | AC110995.1 | 0.408224809  | 1.71E-16  | postive  |
| CCR2     | AC110995.1 | 0.470861828  | 4.33E-22  | postive  |
| NLRC4    | AC110995.1 | 0.434479493  | 1.07E-18  | postive  |
| ATG16L2  | LINC01588  | 0.454964654  | 1.47E-20  | postive  |
| BCL2     | AC100830.2 | 0.432689709  | 1.53E-18  | postive  |
| CFLAR    | AC100830.2 | 0.402739452  | 4.69E-16  | postive  |
| DLC1     | AC100830.2 | 0.401810575  | 5.55E-16  | postive  |
| GAPDH    | AC100830.2 | -0.402028293 | 5.33E-16  | negative |
| HSPB8    | AC100830.2 | 0.559328635  | 2.99E-32  | postive  |
| ITPR1    | AC100830.2 | 0.539664721  | 9.98E-30  | postive  |
| ULK2     | AC100830.2 | 0.446314295  | 9.32E-20  | postive  |
| MAP1LC3  | AC055764.1 | 0.456653535  | 1.02E-20  | postive  |
| EIF2AK2  | AP001610.2 | 0.444166658  | 1.46E-19  | postive  |
| MAP1LC3  | AC010422.4 | 0.478610107  | 7.25E-23  | postive  |
| SPNS1    | AC145285.6 | 0.439453774  | 3.87E-19  | postive  |
| ATG16L2  | AC090510.2 | 0.493840855  | 1.89E-24  | postive  |
| ITPR1    | AC090510.2 | 0.418036237  | 2.70E-17  | postive  |
| ATG16L2  | AC087501.1 | 0.427890102  | 3.98E-18  | postive  |



|          |             |              |          |          |
|----------|-------------|--------------|----------|----------|
| ATG16L2  | MAP3K14-AS1 | 0.494026106  | 1.80E-24 | postive  |
| HSPB8    | AL157904.1  | 0.41641799   | 3.68E-17 | postive  |
| CX3CL1   | AL157871.2  | 0.405887254  | 2.64E-16 | postive  |
| IFNG     | AL157871.2  | 0.503490314  | 1.70E-25 | postive  |
| ARSB     | LINC00578   | 0.496524797  | 9.74E-25 | postive  |
| DLC1     | LINC00578   | 0.652576827  | 7.19E-47 | postive  |
| GABARAP  | LINC00578   | 0.411760655  | 8.87E-17 | postive  |
| HSPB8    | LINC00578   | 0.636692316  | 5.08E-44 | postive  |
| ITGB1    | LINC00578   | 0.512008682  | 1.90E-26 | postive  |
| ITPR1    | LINC00578   | 0.539372451  | 1.09E-29 | postive  |
| PEA15    | LINC00578   | 0.517087484  | 5.00E-27 | postive  |
| ULK2     | LINC00578   | 0.458015584  | 7.60E-21 | postive  |
| ZFYVE1   | LINC00578   | 0.402157752  | 5.21E-16 | postive  |
| ATG16L2  | AC105339.3  | 0.406989036  | 2.15E-16 | postive  |
| MAPK8IP1 | TPT1-AS1    | 0.43243916   | 1.61E-18 | postive  |
| PEX3     | TPT1-AS1    | 0.400557929  | 6.95E-16 | postive  |
| PINK1    | AC073333.1  | -0.406333817 | 2.43E-16 | negative |
| GRID1    | AC005696.4  | 0.507821329  | 5.62E-26 | postive  |
| MAPK8IP1 | AC005696.4  | 0.427511975  | 4.29E-18 | postive  |
| TP63     | AC103563.7  | 0.432316665  | 1.65E-18 | postive  |
| ATG16L2  | AC092119.2  | 0.426393107  | 5.35E-18 | postive  |
| TSC1     | AC092119.2  | 0.40050193   | 7.03E-16 | postive  |
| ATG16L2  | AC011479.2  | 0.437010027  | 6.38E-19 | postive  |
| BECN1    | AC016876.2  | -0.414060356 | 5.76E-17 | negative |
| ATG2B    | STARD4-AS1  | 0.452560084  | 2.47E-20 | postive  |
| BAK1     | STARD4-AS1  | -0.408607177 | 1.60E-16 | negative |
| DLC1     | STARD4-AS1  | 0.432363937  | 1.63E-18 | postive  |
| ITPR1    | STARD4-AS1  | 0.408128807  | 1.74E-16 | postive  |
| TSC1     | AC024361.3  | 0.430176267  | 2.53E-18 | postive  |
| ATIC     | AC104825.1  | -0.457181013 | 9.12E-21 | negative |
| BID      | AC104825.1  | -0.407617823 | 1.92E-16 | negative |
| BIRC5    | AC104825.1  | -0.412332798 | 7.97E-17 | negative |
| DLC1     | AC104825.1  | 0.499561792  | 4.57E-25 | postive  |
| GABARAP  | AC104825.1  | 0.472217651  | 3.18E-22 | postive  |
| HDAC1    | AC104825.1  | -0.406439633 | 2.38E-16 | negative |
| HSPB8    | AC104825.1  | 0.65519372   | 2.35E-47 | postive  |
| ITPR1    | AC104825.1  | 0.540167309  | 8.65E-30 | postive  |
| NRG2     | AC104825.1  | 0.468783925  | 6.94E-22 | postive  |
| ULK2     | AC104825.1  | 0.493753775  | 1.93E-24 | postive  |
| ZFYVE1   | AC104825.1  | 0.461554647  | 3.49E-21 | postive  |
| MAPK8IP1 | AC002401.2  | 0.497035232  | 8.58E-25 | postive  |
| ATG16L2  | AL365330.1  | 0.541027855  | 6.76E-30 | postive  |
| TSC1     | AL365330.1  | 0.420054902  | 1.84E-17 | postive  |
| DLC1     | AC005837.4  | 0.520349063  | 2.10E-27 | postive  |

|         |               |              |          |          |
|---------|---------------|--------------|----------|----------|
| HSPB8   | AC005837.4    | 0.452649289  | 2.43E-20 | postive  |
| ITPR1   | AC005837.4    | 0.465099882  | 1.59E-21 | postive  |
| ULK2    | AC005837.4    | 0.460822341  | 4.11E-21 | postive  |
| P4HB    | AC015726.1    | -0.415036858 | 4.79E-17 | negative |
| ATG16L2 | AC073655.2    | 0.4181589    | 2.64E-17 | postive  |
| ARSB    | LINC00863     | 0.404668673  | 3.30E-16 | postive  |
| MAP2K7  | LINC00863     | 0.465924465  | 1.32E-21 | postive  |
| PINK1   | LINC00863     | 0.415342253  | 4.52E-17 | postive  |
| ULK1    | LINC00863     | 0.410140808  | 1.20E-16 | postive  |
| ARSB    | AL354811.1    | 0.557120108  | 5.86E-32 | postive  |
| DLC1    | AL354811.1    | 0.508293508  | 4.98E-26 | postive  |
| SPNS1   | AC026471.1    | 0.515668148  | 7.28E-27 | postive  |
| RB1CC1  | AC010834.3    | 0.485164949  | 1.54E-23 | postive  |
| MAP1LC3 | LCMT1-AS1     | 0.413856227  | 5.98E-17 | postive  |
| ATG16L2 | AC063965.2    | 0.413112797  | 6.88E-17 | postive  |
| CHMP4B  | CH17-340M24.3 | 0.405259061  | 2.96E-16 | postive  |
| RAB24   | CH17-340M24.3 | 0.402447262  | 4.94E-16 | postive  |
| ATG16L2 | AC025034.1    | 0.514201087  | 1.07E-26 | postive  |
| GOPC    | MROCKI        | 0.472153437  | 3.23E-22 | postive  |
| FADD    | LINC02747     | 0.432580705  | 1.56E-18 | postive  |
| CASP4   | AL163952.1    | 0.42751022   | 4.29E-18 | postive  |
| ATG16L2 | AC025043.1    | 0.413169696  | 6.81E-17 | postive  |
| CFLAR   | AC025043.1    | 0.420370145  | 1.73E-17 | postive  |
| GAPDH   | AC025043.1    | -0.400696311 | 6.78E-16 | negative |
| ITGA3   | MANCR         | 0.421538857  | 1.38E-17 | postive  |
| PINK1   | AC007038.1    | -0.508864859 | 4.30E-26 | negative |
| BIRC5   | AC012640.2    | 0.415248222  | 4.60E-17 | postive  |
| MAP1LC3 | AC009831.3    | 0.532338135  | 7.90E-29 | postive  |
| EIF4G1  | AL354760.1    | -0.415627754 | 4.28E-17 | negative |
| MAP1LC3 | AL023584.2    | 0.435250436  | 9.13E-19 | postive  |
| GABARAP | AC139768.1    | 0.448289054  | 6.14E-20 | postive  |
| HSPB8   | AC139768.1    | 0.469249675  | 6.25E-22 | postive  |
| ITPR1   | AC139768.1    | 0.423706697  | 9.05E-18 | postive  |
| ATG16L2 | ACAP2-IT1     | 0.545237745  | 2.00E-30 | postive  |
| ATG2B   | ACAP2-IT1     | 0.507250988  | 6.51E-26 | postive  |
| BIRC6   | ACAP2-IT1     | 0.541772231  | 5.45E-30 | postive  |
| IKBKB   | ACAP2-IT1     | 0.448821644  | 5.49E-20 | postive  |
| KLHL24  | ACAP2-IT1     | 0.46857127   | 7.28E-22 | postive  |
| PIK3R4  | ACAP2-IT1     | 0.40167019   | 5.69E-16 | postive  |
| TSC1    | ACAP2-IT1     | 0.471104187  | 4.10E-22 | postive  |
| MAP1LC3 | LINC00173     | 0.425018998  | 7.00E-18 | postive  |
| ATG16L2 | LINC01857     | 0.43705957   | 6.32E-19 | postive  |
| BCL2    | LINC01857     | 0.587659985  | 3.40E-36 | postive  |
| CXCR4   | LINC01857     | 0.661101847  | 1.80E-48 | postive  |

|          |             |              |          |          |
|----------|-------------|--------------|----------|----------|
| MAP1LC3  | LINC01857   | 0.499511507  | 4.63E-25 | postive  |
| HDAC6    | H19         | 0.424268016  | 8.11E-18 | postive  |
| SERPINA1 | LINC02637   | 0.56030779   | 2.22E-32 | postive  |
| MAP1LC3  | AC126773.3  | 0.415760105  | 4.17E-17 | postive  |
| ATG16L2  | RBM5-AS1    | 0.50577183   | 9.51E-26 | postive  |
| CFLAR    | RBM5-AS1    | 0.412944671  | 7.10E-17 | postive  |
| BCL2     | AL132642.1  | 0.546593869  | 1.35E-30 | postive  |
| DLC1     | AL132642.1  | 0.610198151  | 1.27E-39 | postive  |
| HSPB8    | AL132642.1  | 0.796749889  | 1.33E-83 | postive  |
| ITGB1    | AL132642.1  | 0.417709839  | 2.88E-17 | postive  |
| ITPR1    | AL132642.1  | 0.683818795  | 5.27E-53 | postive  |
| NRG2     | AL132642.1  | 0.453128128  | 2.19E-20 | postive  |
| ULK2     | AL132642.1  | 0.49224925   | 2.79E-24 | postive  |
| ATG16L2  | AC018410.1  | 0.456328778  | 1.10E-20 | postive  |
| CFLAR    | AC018410.1  | 0.456793636  | 9.92E-21 | postive  |
| ITGB4    | AC087289.5  | 0.413841496  | 6.00E-17 | postive  |
| ATG16L2  | AC109460.2  | 0.470413366  | 4.80E-22 | postive  |
| ATG16L2  | AC090971.2  | 0.428638837  | 3.43E-18 | postive  |
| DIRAS3   | AC002456.1  | 0.466844092  | 1.08E-21 | postive  |
| GRID1    | AC002456.1  | 0.683685967  | 5.62E-53 | postive  |
| TP63     | AC040904.1  | 0.464450433  | 1.84E-21 | postive  |
| ATG16L2  | AC078883.1  | 0.462383104  | 2.91E-21 | postive  |
| IKBKB    | AC078883.1  | 0.42491439   | 7.15E-18 | postive  |
| ITGA6    | AC078883.1  | 0.525090277  | 5.82E-28 | postive  |
| ATG16L2  | EFCAB14-AS1 | 0.439104296  | 4.16E-19 | postive  |
| ATG2B    | EFCAB14-AS1 | 0.46570211   | 1.39E-21 | postive  |
| BIRC6    | EFCAB14-AS1 | 0.443935695  | 1.53E-19 | postive  |
| EIF2AK3  | EFCAB14-AS1 | 0.404430174  | 3.44E-16 | postive  |
| MAPK8IP1 | AP000757.1  | 0.445539992  | 1.10E-19 | postive  |
| ATG2B    | AC004837.2  | 0.408443109  | 1.65E-16 | postive  |
| ATG16L2  | AC022558.3  | 0.452094335  | 2.73E-20 | postive  |
| GAPDH    | AC016949.1  | -0.408806776 | 1.54E-16 | negative |
| HSPA8    | AC016949.1  | -0.419117175 | 2.20E-17 | negative |
| MAP1LC3  | AC087749.2  | 0.412365523  | 7.92E-17 | postive  |
| ATG16L2  | AC096586.2  | 0.50324348   | 1.81E-25 | postive  |
| ATG2B    | AC096586.2  | 0.445909448  | 1.01E-19 | postive  |
| IKBKB    | AC096586.2  | 0.443984024  | 1.52E-19 | postive  |
| TSC1     | AC096586.2  | 0.443480518  | 1.68E-19 | postive  |
| ATG16L2  | AC024267.5  | 0.413904121  | 5.93E-17 | postive  |
| FOS      | NR4A1AS     | 0.538824076  | 1.27E-29 | postive  |
| ATG16L2  | AC009950.1  | 0.460689796  | 4.23E-21 | postive  |
| BCL2     | AC009950.1  | 0.444351351  | 1.41E-19 | postive  |
| CFLAR    | AC009950.1  | 0.440132431  | 3.37E-19 | postive  |
| CXCR4    | AC009950.1  | 0.427335534  | 4.44E-18 | postive  |

|          |            |              |          |          |
|----------|------------|--------------|----------|----------|
| DLC1     | AC067750.1 | 0.606470112  | 4.89E-39 | postive  |
| GABARAP  | AC067750.1 | 0.402866598  | 4.58E-16 | postive  |
| HSPB8    | AC067750.1 | 0.726687145  | 8.53E-63 | postive  |
| ITPR1    | AC067750.1 | 0.56734212   | 2.50E-33 | postive  |
| P4HB     | AC067750.1 | -0.452718369 | 2.39E-20 | negative |
| ULK2     | AC067750.1 | 0.554991517  | 1.11E-31 | postive  |
| MAPK8IP1 | LINC00235  | 0.413189143  | 6.78E-17 | postive  |
| ATG16L2  | AC137932.3 | 0.506394013  | 8.11E-26 | postive  |
| TSC1     | AC137932.3 | 0.420896     | 1.56E-17 | postive  |
| BCL2     | LINC00476  | 0.50452968   | 1.31E-25 | postive  |
| EIF2AK3  | LINC00365  | 0.470842458  | 4.35E-22 | postive  |
| ATG16L2  | LINC01355  | 0.471003311  | 4.19E-22 | postive  |
| ATG16L2  | AC027682.4 | 0.419611514  | 2.00E-17 | postive  |
| BCL2     | AC027682.4 | 0.408983603  | 1.49E-16 | postive  |
| BAG3     | AC005841.1 | 0.427001617  | 4.74E-18 | postive  |
| DNAJB1   | AC005841.1 | 0.496302213  | 1.03E-24 | postive  |
| HIF1A    | AC245128.3 | 0.426056001  | 5.71E-18 | postive  |
| IL24     | AC245128.3 | 0.498721247  | 5.64E-25 | postive  |
| NAMPT    | AC245128.3 | 0.474225798  | 2.01E-22 | postive  |
| NLRC4    | AC245128.3 | 0.431023358  | 2.14E-18 | postive  |
| BIRC5    | DNM3OS     | -0.421989629 | 1.26E-17 | negative |
| DLC1     | DNM3OS     | 0.576546603  | 1.33E-34 | postive  |
| EIF4G1   | DNM3OS     | -0.414112036 | 5.70E-17 | negative |
| GABARAP  | DNM3OS     | 0.470539706  | 4.66E-22 | postive  |
| HGS      | DNM3OS     | -0.40466067  | 3.30E-16 | negative |
| HSPB8    | DNM3OS     | 0.463048806  | 2.51E-21 | postive  |
| ITPR1    | DNM3OS     | 0.482968813  | 2.60E-23 | postive  |
| P4HB     | DNM3OS     | -0.43343901  | 1.32E-18 | negative |
| ULK2     | DNM3OS     | 0.43629662   | 7.38E-19 | postive  |
| HSPA8    | AL445248.1 | -0.435163661 | 9.29E-19 | negative |
| KLHL24   | TMEM44-AS1 | 0.404793971  | 3.22E-16 | postive  |
| ATG16L2  | AC087500.1 | 0.524186141  | 7.45E-28 | postive  |
| BCL2     | AC087500.1 | 0.595581788  | 2.28E-37 | postive  |
| CFLAR    | AC087500.1 | 0.443868572  | 1.55E-19 | postive  |
| CXCR4    | AC087500.1 | 0.445182445  | 1.18E-19 | postive  |
| GAPDH    | AC087500.1 | -0.403394093 | 4.16E-16 | negative |
| ITPR1    | AC087500.1 | 0.516320192  | 6.13E-27 | postive  |
| MAP1LC3  | AC087500.1 | 0.437357329  | 5.95E-19 | postive  |
| ATG16L2  | AC005519.1 | 0.545757944  | 1.72E-30 | postive  |
| TSC1     | AC005519.1 | 0.423527593  | 9.37E-18 | postive  |
| ATG16L2  | AL049840.2 | 0.545926673  | 1.64E-30 | postive  |
| ATG2B    | AL049840.2 | 0.427250654  | 4.52E-18 | postive  |
| IKBKB    | AL049840.2 | 0.444597257  | 1.33E-19 | postive  |
| HSPB8    | LINC02762  | 0.577134638  | 1.10E-34 | postive  |

|         |            |             |          |         |
|---------|------------|-------------|----------|---------|
| ATG9B   | LINC00973  | 0.457863723 | 7.86E-21 | postive |
| ARSB    | AC107959.1 | 0.503056823 | 1.90E-25 | postive |
| BCL2    | AC107959.1 | 0.609659515 | 1.54E-39 | postive |
| CCR2    | AC107959.1 | 0.421730588 | 1.33E-17 | postive |
| DLC1    | AC107959.1 | 0.677873404 | 8.87E-52 | postive |
| GABARAP | AC107959.1 | 0.43978453  | 3.62E-19 | postive |
| HSPB8   | AC107959.1 | 0.589628312 | 1.75E-36 | postive |
| ITPR1   | AC107959.1 | 0.718194063 | 1.04E-60 | postive |
| PEA15   | AC107959.1 | 0.470184981 | 5.05E-22 | postive |
| PINK1   | AC107959.1 | 0.407528187 | 1.95E-16 | postive |
| ULK2    | AC107959.1 | 0.483091821 | 2.53E-23 | postive |
| ZFYVE1  | AC107959.1 | 0.433373752 | 1.33E-18 | postive |
| BAG3    | AL049780.2 | 0.421485805 | 1.39E-17 | postive |
| DLC1    | AC100830.1 | 0.464787737 | 1.70E-21 | postive |
| HSPB8   | AC100830.1 | 0.691953858 | 9.90E-55 | postive |
| ITPR1   | AC100830.1 | 0.531844529 | 9.07E-29 | postive |
| NRG2    | AC100830.1 | 0.45293954  | 2.28E-20 | postive |
| ULK2    | AC100830.1 | 0.459755906 | 5.19E-21 | postive |
| DLC1    | AP001347.1 | 0.479124276 | 6.43E-23 | postive |
| HSPB8   | AP001347.1 | 0.580806999 | 3.32E-35 | postive |
| ITPR1   | AP001347.1 | 0.456622312 | 1.03E-20 | postive |
| NRG2    | AP001347.1 | 0.406723351 | 2.26E-16 | postive |
| ATG16L2 | CFLAR-AS1  | 0.466278521 | 1.22E-21 | postive |
| CFLAR   | CFLAR-AS1  | 0.656661237 | 1.25E-47 | postive |
| DIRAS3  | LINC01116  | 0.427834475 | 4.02E-18 | postive |
| GRID1   | LINC01116  | 0.546341817 | 1.45E-30 | postive |
| ATG16L2 | AC138956.1 | 0.540943547 | 6.92E-30 | postive |
| ATG2B   | AC138956.1 | 0.55656349  | 6.93E-32 | postive |
| BIRC6   | AC138956.1 | 0.459561836 | 5.42E-21 | postive |
| IKBKB   | AC138956.1 | 0.424634982 | 7.55E-18 | postive |
| TSC1    | AC138956.1 | 0.495228177 | 1.34E-24 | postive |
| FOXO3   | AL080317.1 | 0.494913743 | 1.45E-24 | postive |
| IFNG    | AP002954.1 | 0.490497307 | 4.27E-24 | postive |
| NLRC4   | AP002954.1 | 0.577375666 | 1.02E-34 | postive |
| ATG16L2 | AP006621.2 | 0.473857357 | 2.18E-22 | postive |
| FOXO3   | AL080317.2 | 0.537087698 | 2.08E-29 | postive |
| PARP1   | EPS15-AS1  | 0.462132863 | 3.07E-21 | postive |
| RGS19   | EPS15-AS1  | 0.430446569 | 2.40E-18 | postive |
| EEF2K   | AC004847.1 | 0.417969936 | 2.74E-17 | postive |
| PARP1   | AC004847.1 | 0.60368026  | 1.33E-38 | postive |
| RGS19   | AC004847.1 | 0.802673673 | 9.80E-86 | postive |
| ATG16L2 | SLBP-DT    | 0.428361918 | 3.63E-18 | postive |
| MAP1LC3 | DLG5-AS1   | 0.414735852 | 5.07E-17 | postive |
| TP63    | LINC02541  | 0.649454925 | 2.69E-46 | postive |

|         |             |              |          |          |
|---------|-------------|--------------|----------|----------|
| ATG16L2 | AC012181.2  | 0.491681808  | 3.20E-24 | postive  |
| CFLAR   | AC012181.2  | 0.475168815  | 1.61E-22 | postive  |
| CXCR4   | AC012181.2  | 0.415852181  | 4.10E-17 | postive  |
| DIRAS3  | AL359853.1  | 0.45855114   | 6.76E-21 | postive  |
| BCL2    | AC133065.1  | 0.468970853  | 6.66E-22 | postive  |
| PARP1   | AC133065.1  | 0.472014471  | 3.33E-22 | postive  |
| RGS19   | AC133065.1  | 0.655693742  | 1.89E-47 | postive  |
| PELP1   | AC091153.2  | 0.425728417  | 6.09E-18 | postive  |
| ATG16L2 | AL158163.2  | 0.493995171  | 1.82E-24 | postive  |
| TSC1    | TMEM147-AS1 | 0.419460749  | 2.06E-17 | postive  |
| ATG16L2 | AC008105.2  | 0.578991251  | 6.01E-35 | postive  |
| BCL2    | AC008105.2  | 0.582425506  | 1.95E-35 | postive  |
| CCR2    | AC008105.2  | 0.463948391  | 2.05E-21 | postive  |
| CFLAR   | AC008105.2  | 0.520407889  | 2.06E-27 | postive  |
| CXCR4   | AC008105.2  | 0.615891485  | 1.56E-40 | postive  |
| ITPR1   | AC008105.2  | 0.433394121  | 1.33E-18 | postive  |
| MAP1LC3 | AC008105.2  | 0.450333156  | 3.98E-20 | postive  |
| CTSD    | AC068580.3  | 0.739829448  | 3.51E-66 | postive  |
| BCL2    | AF001548.2  | 0.411622992  | 9.10E-17 | postive  |
| DLC1    | AF001548.2  | 0.462559217  | 2.80E-21 | postive  |
| HSPB8   | AF001548.2  | 0.650478854  | 1.75E-46 | postive  |
| ITPR1   | AF001548.2  | 0.513736626  | 1.21E-26 | postive  |
| NRG2    | AF001548.2  | 0.420758527  | 1.60E-17 | postive  |
| ULK2    | AF001548.2  | 0.447098517  | 7.90E-20 | postive  |
| RAC1    | AL355353.1  | 0.432761779  | 1.51E-18 | postive  |
| ARSA    | CHKB-DT     | 0.486153266  | 1.22E-23 | postive  |
| SIRT1   | BMS1P4      | 0.401188815  | 6.21E-16 | postive  |
| ATG16L2 | AL137779.2  | 0.417186726  | 3.18E-17 | postive  |
| BCL2    | AL137779.2  | 0.438719557  | 4.50E-19 | postive  |
| CXCR4   | AL137779.2  | 0.401045482  | 6.37E-16 | postive  |
| ARSB    | NR2F1-AS1   | 0.469136776  | 6.41E-22 | postive  |
| BCL2    | NR2F1-AS1   | 0.447513839  | 7.24E-20 | postive  |
| DLC1    | NR2F1-AS1   | 0.662318543  | 1.05E-48 | postive  |
| GABARAP | NR2F1-AS1   | 0.530337748  | 1.38E-28 | postive  |
| HDAC1   | NR2F1-AS1   | -0.416891624 | 3.36E-17 | negative |
| HSPA5   | NR2F1-AS1   | -0.413081079 | 6.92E-17 | negative |
| HSPB8   | NR2F1-AS1   | 0.687148156  | 1.05E-53 | postive  |
| ITGB1   | NR2F1-AS1   | 0.407012315  | 2.14E-16 | postive  |
| ITPR1   | NR2F1-AS1   | 0.603821922  | 1.26E-38 | postive  |
| NRG2    | NR2F1-AS1   | 0.412616177  | 7.55E-17 | postive  |
| PEA15   | NR2F1-AS1   | 0.474728573  | 1.79E-22 | postive  |
| PRKCD   | NR2F1-AS1   | -0.403759079 | 3.89E-16 | negative |
| ULK2    | NR2F1-AS1   | 0.529438191  | 1.77E-28 | postive  |
| ZFYVE1  | NR2F1-AS1   | 0.415490459  | 4.39E-17 | postive  |

|          |            |              |          |          |
|----------|------------|--------------|----------|----------|
| MAP1LC3  | AL035658.1 | 0.442768594  | 1.95E-19 | postive  |
| NLRC4    | AL117336.1 | 0.422356605  | 1.18E-17 | postive  |
| ATG16L2  | ZNF32-AS2  | 0.437072113  | 6.30E-19 | postive  |
| MAPK8    | ZNF32-AS2  | 0.406604531  | 2.31E-16 | postive  |
| TSC1     | ZNF32-AS2  | 0.404981328  | 3.11E-16 | postive  |
| ATG16L2  | AC003070.1 | 0.440716946  | 2.99E-19 | postive  |
| BIRC5    | AC074135.1 | 0.414631351  | 5.17E-17 | postive  |
| MAPK8IP1 | RASSF10-DT | 0.400976446  | 6.45E-16 | postive  |
| TP63     | AL683807.1 | 0.526901062  | 3.55E-28 | postive  |
| RB1CC1   | AC113139.1 | 0.457960419  | 7.69E-21 | postive  |
| ATG16L2  | AC015727.1 | 0.452612844  | 2.45E-20 | postive  |
| BCL2     | AC015727.1 | 0.416511074  | 3.62E-17 | postive  |
| ATG16L2  | AC132872.3 | 0.550218183  | 4.63E-31 | postive  |
| TSC1     | AC132872.3 | 0.455164661  | 1.41E-20 | postive  |
| ATG16L2  | AC110792.3 | 0.404856017  | 3.19E-16 | postive  |
| ATG16L2  | Z82243.1   | 0.433628581  | 1.27E-18 | postive  |
| IL24     | AC113346.1 | 0.449017777  | 5.27E-20 | postive  |
| ARNT     | AL139011.1 | 0.44003186   | 3.44E-19 | postive  |
| ATG16L2  | AL139011.1 | 0.414399843  | 5.40E-17 | postive  |
| BCL2     | AC145098.1 | 0.483760939  | 2.16E-23 | postive  |
| EDEM1    | AC145098.1 | 0.463928661  | 2.06E-21 | postive  |
| NLRC4    | AC145098.1 | 0.427301195  | 4.47E-18 | postive  |
| PARP1    | AC145098.1 | 0.527236411  | 3.24E-28 | postive  |
| RGS19    | AC145098.1 | 0.709954226  | 9.23E-59 | postive  |
| ITPR1    | AC090152.1 | 0.417159667  | 3.20E-17 | postive  |
| CCR2     | AC008972.2 | 0.426579341  | 5.15E-18 | postive  |
| ATG16L2  | AF129075.1 | 0.417775621  | 2.84E-17 | postive  |
| DLC1     | AC103740.1 | 0.400331635  | 7.24E-16 | postive  |
| HSPB8    | AC103740.1 | 0.691613999  | 1.17E-54 | postive  |
| ITPR1    | AC103740.1 | 0.400928368  | 6.50E-16 | postive  |
| KLHL24   | AC092953.2 | 0.46813009   | 8.05E-22 | postive  |
| ATG16L2  | AL159169.2 | 0.415512716  | 4.37E-17 | postive  |
| ATG16L2  | AC087276.1 | 0.421825375  | 1.30E-17 | postive  |
| BCL2     | RBM38-AS1  | 0.577570618  | 9.55E-35 | postive  |
| CXCR4    | RBM38-AS1  | 0.449180301  | 5.09E-20 | postive  |
| HSPB8    | RBM38-AS1  | 0.493772896  | 1.92E-24 | postive  |
| ITPR1    | RBM38-AS1  | 0.502935871  | 1.96E-25 | postive  |
| NRG2     | RBM38-AS1  | 0.418090174  | 2.68E-17 | postive  |
| GAPDH    | RNF216-IT1 | -0.408878119 | 1.52E-16 | negative |
| HSPB8    | RNF216-IT1 | 0.455293639  | 1.37E-20 | postive  |
| ITPR1    | RNF216-IT1 | 0.458992229  | 6.14E-21 | postive  |
| P4HB     | RNF216-IT1 | -0.407902368 | 1.82E-16 | negative |
| IL24     | GK-IT1     | 0.583032029  | 1.59E-35 | postive  |
| ATF6     | AL391001.1 | 0.459151031  | 5.93E-21 | postive  |

|          |            |              |          |          |
|----------|------------|--------------|----------|----------|
| DNAJB9   | AL391001.1 | 0.439659628  | 3.71E-19 | postive  |
| FKBP1A   | AL035461.2 | 0.454885944  | 1.50E-20 | postive  |
| ATG16L2  | AC024267.3 | 0.477348815  | 9.73E-23 | postive  |
| GAPDH    | AC024267.3 | -0.410434053 | 1.14E-16 | negative |
| BCL2     | AC018755.4 | 0.402666976  | 4.75E-16 | postive  |
| CXCR4    | AC018755.4 | 0.490384794  | 4.39E-24 | postive  |
| DLC1     | CARMN      | 0.561943114  | 1.34E-32 | postive  |
| HSPB8    | CARMN      | 0.735691604  | 4.30E-65 | postive  |
| ITPR1    | CARMN      | 0.595547949  | 2.30E-37 | postive  |
| NRG2     | CARMN      | 0.468399145  | 7.57E-22 | postive  |
| ULK2     | CARMN      | 0.479767338  | 5.53E-23 | postive  |
| EIF4G1   | AC010245.2 | -0.420441495 | 1.70E-17 | negative |
| P4HB     | AC010245.2 | -0.432987294 | 1.44E-18 | negative |
| ATG16L2  | AC023906.5 | 0.417265547  | 3.13E-17 | postive  |
| CFLAR    | SAP30L-AS1 | 0.424908803  | 7.15E-18 | postive  |
| ATG16L2  | CR936218.1 | 0.560869814  | 1.87E-32 | postive  |
| ATG2B    | CR936218.1 | 0.571397349  | 6.95E-34 | postive  |
| BIRC6    | CR936218.1 | 0.524298769  | 7.22E-28 | postive  |
| DAPK1    | CR936218.1 | 0.441048308  | 2.79E-19 | postive  |
| IKBKB    | CR936218.1 | 0.488338078  | 7.21E-24 | postive  |
| PIK3R4   | CR936218.1 | 0.43649352   | 7.09E-19 | postive  |
| TSC1     | CR936218.1 | 0.575619815  | 1.80E-34 | postive  |
| DLC1     | AC037198.2 | 0.647917542  | 5.13E-46 | postive  |
| IL24     | AC037198.2 | 0.491624918  | 3.25E-24 | postive  |
| ITPR1    | AC037198.2 | 0.464754579  | 1.72E-21 | postive  |
| ATG16L2  | AC133550.3 | 0.405813276  | 2.67E-16 | postive  |
| BCL2     | AC138207.5 | 0.418783569  | 2.34E-17 | postive  |
| CCR2     | AC138207.5 | 0.453776019  | 1.91E-20 | postive  |
| CFLAR    | AC138207.5 | 0.41781339   | 2.82E-17 | postive  |
| RAB24    | AC011298.1 | 0.529584055  | 1.70E-28 | postive  |
| ATG16L2  | AC011479.3 | 0.454515575  | 1.62E-20 | postive  |
| MAP1LC3  | AC060766.5 | 0.443741299  | 1.60E-19 | postive  |
| EIF4EBP1 | AP006545.2 | 0.503858879  | 1.55E-25 | postive  |
| FADD     | AP003555.2 | 0.531978308  | 8.73E-29 | postive  |
| ARSB     | AC124312.3 | 0.476123463  | 1.29E-22 | postive  |
| BCL2     | AC124312.3 | 0.512596645  | 1.63E-26 | postive  |
| DLC1     | AC124312.3 | 0.616386322  | 1.30E-40 | postive  |
| HSPB8    | AC124312.3 | 0.658569962  | 5.46E-48 | postive  |
| ITPR1    | AC124312.3 | 0.700157424  | 1.57E-56 | postive  |
| NRG2     | AC124312.3 | 0.461526846  | 3.52E-21 | postive  |
| RAC1     | AC124312.3 | -0.400087133 | 7.57E-16 | negative |
| ULK2     | AC124312.3 | 0.502338775  | 2.27E-25 | postive  |
| MAP2K7   | AC004540.2 | 0.551391492  | 3.27E-31 | postive  |
| MAPK8IP1 | AC004540.2 | 0.697790202  | 5.27E-56 | postive  |



|          |              |              |           |          |
|----------|--------------|--------------|-----------|----------|
| PEX3     | AC004540.2   | 0.566206369  | 3.57E-33  | postive  |
| CAPN10   | OGFR-AS1     | 0.456066604  | 1.16E-20  | postive  |
| RAB24    | OGFR-AS1     | 0.434597179  | 1.04E-18  | postive  |
| HSPB8    | AC005034.5   | 0.405209212  | 2.99E-16  | postive  |
| ATG16L2  | U73169.1     | 0.494980602  | 1.43E-24  | postive  |
| PEA15    | THAP9-AS1    | -0.415415541 | 4.45E-17  | negative |
| HSP90AB1 | AL035587.1   | 0.477174803  | 1.01E-22  | postive  |
| DLC1     | AC025280.1   | 0.560947419  | 1.82E-32  | postive  |
| HSPB8    | AC025280.1   | 0.522217103  | 1.27E-27  | postive  |
| ITPR1    | AC025280.1   | 0.480611056  | 4.54E-23  | postive  |
| PELP1    | AC091153.3   | 0.600919894  | 3.53E-38  | postive  |
| BECN1    | SNHG6        | -0.412941134 | 7.11E-17  | negative |
| DDIT3    | AGAP2-AS1    | 0.548101614  | 8.65E-31  | postive  |
| GRID1    | HAGLROS      | 0.550812985  | 3.88E-31  | postive  |
| MAPK8IP1 | HAGLROS      | 0.509384343  | 3.76E-26  | postive  |
| BCL2     | MIR1-1HG-AS1 | 0.410089416  | 1.21E-16  | postive  |
| DLC1     | MIR1-1HG-AS1 | 0.620059925  | 3.28E-41  | postive  |
| HSPB8    | MIR1-1HG-AS1 | 0.882794854  | 1.90E-124 | postive  |
| ITPR1    | MIR1-1HG-AS1 | 0.58531326   | 7.46E-36  | postive  |
| NRG2     | MIR1-1HG-AS1 | 0.490841181  | 3.93E-24  | postive  |
| ULK2     | MIR1-1HG-AS1 | 0.519354779  | 2.74E-27  | postive  |
| BCL2     | TSPOAP1-AS1  | 0.622860648  | 1.13E-41  | postive  |
| CXCR4    | TSPOAP1-AS1  | 0.495286403  | 1.32E-24  | postive  |
| ITPR1    | TSPOAP1-AS1  | 0.408379515  | 1.66E-16  | postive  |
| RGS19    | TSPOAP1-AS1  | 0.510617373  | 2.73E-26  | postive  |
| ATG16L2  | AC012181.1   | 0.49371753   | 1.95E-24  | postive  |
| CFLAR    | AC012181.1   | 0.452950055  | 2.28E-20  | postive  |
| EDEM1    | AC012181.1   | 0.411786636  | 8.83E-17  | postive  |
| ARSB     | MSC-AS1      | 0.565490058  | 4.47E-33  | postive  |
| BCL2     | MSC-AS1      | 0.449946519  | 4.32E-20  | postive  |
| DLC1     | MSC-AS1      | 0.535624782  | 3.14E-29  | postive  |
| ITPR1    | MSC-AS1      | 0.508345539  | 4.91E-26  | postive  |
| PEA15    | MSC-AS1      | 0.407921735  | 1.81E-16  | postive  |
| ATG16L2  | AC005253.1   | 0.537285168  | 1.97E-29  | postive  |
| ATG16L2  | ERVK13-1     | 0.646091972  | 1.10E-45  | postive  |
| ATG2B    | ERVK13-1     | 0.459822766  | 5.12E-21  | postive  |
| BIRC6    | ERVK13-1     | 0.42148603   | 1.39E-17  | postive  |
| TSC2     | ERVK13-1     | 0.456964724  | 9.56E-21  | postive  |
| DIRAS3   | MRPS30-DT    | 0.493310336  | 2.15E-24  | postive  |
| GRID1    | MRPS30-DT    | 0.64312033   | 3.75E-45  | postive  |
| MAP1LC3  | AC117490.2   | 0.426321757  | 5.42E-18  | postive  |
| ATG16L2  | AC008115.3   | 0.489285804  | 5.73E-24  | postive  |
| CDKN1B   | AC008115.3   | 0.536977199  | 2.14E-29  | postive  |
| TP63     | FALEC        | 0.427350728  | 4.43E-18  | postive  |

|         |              |             |          |         |
|---------|--------------|-------------|----------|---------|
| MAP1LC3 | AC022960.1   | 0.446800891 | 8.41E-20 | postive |
| MAP1LC3 | AC027018.1   | 0.511613517 | 2.11E-26 | postive |
| RAB24   | AC138150.2   | 0.470796616 | 4.40E-22 | postive |
| BCL2    | AC090587.1   | 0.404763149 | 3.24E-16 | postive |
| ATG16L2 | AL022238.2   | 0.535723246 | 3.06E-29 | postive |
| CFLAR   | AL022238.2   | 0.427275587 | 4.49E-18 | postive |
| ATG2B   | AL031320.2   | 0.40748082  | 1.97E-16 | postive |
| PEX3    | AL031320.2   | 0.482223606 | 3.10E-23 | postive |
| MAP1LC3 | AC068025.2   | 0.41740193  | 3.05E-17 | postive |
| P4HB    | AL132639.2   | 0.402354893 | 5.02E-16 | postive |
| ATG9B   | SH3PXD2A-AS1 | 0.448310698 | 6.12E-20 | postive |
| ATG16L2 | AL049552.1   | 0.406062408 | 2.55E-16 | postive |
| ATG2B   | AL049552.1   | 0.514525068 | 9.84E-27 | postive |
| BIRC6   | AL049552.1   | 0.410122589 | 1.20E-16 | postive |
| GOPC    | AL049552.1   | 0.416254691 | 3.80E-17 | postive |
| ATG16L2 | LINC02273    | 0.418486114 | 2.48E-17 | postive |
| BCL2    | LINC02273    | 0.607364464 | 3.55E-39 | postive |
| CXCR4   | LINC02273    | 0.638720231 | 2.25E-44 | postive |
| DLC1    | ZNF667-AS1   | 0.474165954 | 2.03E-22 | postive |
| GABARAP | ZNF667-AS1   | 0.508062412 | 5.28E-26 | postive |
| HSPB8   | ZNF667-AS1   | 0.54270876  | 4.16E-30 | postive |
| ITPR1   | ZNF667-AS1   | 0.481684124 | 3.52E-23 | postive |
| PEA15   | ZNF667-AS1   | 0.43600621  | 7.83E-19 | postive |
| ATG16L2 | AC009095.1   | 0.502775014 | 2.04E-25 | postive |
| ATG16L2 | AL031600.1   | 0.540949086 | 6.91E-30 | postive |
| ATG2B   | AL031600.1   | 0.421455644 | 1.40E-17 | postive |
| BIRC6   | AL031600.1   | 0.407408543 | 1.99E-16 | postive |
| TSC1    | AL031600.1   | 0.477771356 | 8.82E-23 | postive |
| TSC2    | AL031600.1   | 0.474105353 | 2.06E-22 | postive |
| ARNT    | LINC01128    | 0.401670062 | 5.69E-16 | postive |
| ATG16L2 | CEP250-AS1   | 0.465961745 | 1.31E-21 | postive |
| BCL2    | CEP250-AS1   | 0.554520787 | 1.28E-31 | postive |
| CXCR4   | CEP250-AS1   | 0.514401141 | 1.02E-26 | postive |
| MAP1LC3 | CEP250-AS1   | 0.506228948 | 8.46E-26 | postive |
| RGS19   | CEP250-AS1   | 0.478658302 | 7.17E-23 | postive |
| DIRAS3  | AC005076.1   | 0.436685247 | 6.82E-19 | postive |
| GRID1   | AC005076.1   | 0.615296315 | 1.95E-40 | postive |
| ATG16L2 | N4BP2L2-IT2  | 0.466960287 | 1.05E-21 | postive |
| ATG2B   | N4BP2L2-IT2  | 0.463652211 | 2.19E-21 | postive |
| GOPC    | N4BP2L2-IT2  | 0.423852473 | 8.79E-18 | postive |
| TSC1    | N4BP2L2-IT2  | 0.430726667 | 2.27E-18 | postive |
| TSC1    | AL358115.1   | 0.440868398 | 2.89E-19 | postive |
| MAP1LC3 | AC026803.1   | 0.407569495 | 1.93E-16 | postive |
| CCR2    | LINC02362    | 0.407230559 | 2.06E-16 | postive |

|          |              |              |          |          |
|----------|--------------|--------------|----------|----------|
| MAP1LC3  | AC013553.3   | 0.420546836  | 1.67E-17 | postive  |
| ARSB     | AC006059.1   | 0.453353245  | 2.09E-20 | postive  |
| ATIC     | AC006059.1   | -0.429328003 | 2.99E-18 | negative |
| BCL2     | AC006059.1   | 0.493994017  | 1.82E-24 | postive  |
| BIRC5    | AC006059.1   | -0.417571083 | 2.96E-17 | negative |
| DLC1     | AC006059.1   | 0.553489962  | 1.75E-31 | postive  |
| GABARAP  | AC006059.1   | 0.472039798  | 3.31E-22 | postive  |
| HSPB8    | AC006059.1   | 0.594311173  | 3.53E-37 | postive  |
| ITPR1    | AC006059.1   | 0.630522624  | 5.87E-43 | postive  |
| NRG2     | AC006059.1   | 0.447720217  | 6.93E-20 | postive  |
| ULK2     | AC006059.1   | 0.478248153  | 7.89E-23 | postive  |
| ZFYVE1   | AC006059.1   | 0.418255903  | 2.59E-17 | postive  |
| ATG16L2  | USP3-AS1     | 0.541964665  | 5.16E-30 | postive  |
| TP63     | DSG1-AS1     | 0.454178007  | 1.75E-20 | postive  |
| BECN1    | AC073896.4   | -0.477836372 | 8.69E-23 | negative |
| HSPA8    | AC073896.4   | -0.453457116 | 2.04E-20 | negative |
| RAC1     | AC073896.4   | 0.401767571  | 5.59E-16 | postive  |
| ATG16L2  | AC005332.7   | 0.4243139    | 8.04E-18 | postive  |
| BCL2     | AC005332.7   | 0.402764826  | 4.66E-16 | postive  |
| CXCR4    | AC005332.7   | 0.465692374  | 1.39E-21 | postive  |
| MAP1LC3  | PRDX6-AS1    | 0.48602852   | 1.26E-23 | postive  |
| BCL2     | AC104653.1   | 0.454798244  | 1.53E-20 | postive  |
| CXCR4    | AC104653.1   | 0.489678002  | 5.21E-24 | postive  |
| MAP1LC3  | AC104653.1   | 0.409371312  | 1.39E-16 | postive  |
| RGS19    | AC104653.1   | 0.526542957  | 3.92E-28 | postive  |
| CTSB     | AC105001.1   | 0.505118962  | 1.12E-25 | postive  |
| MAPK8IP1 | ATP6V0E2-AS1 | 0.415469518  | 4.41E-17 | postive  |
| ATG16L2  | AC138150.1   | 0.400579992  | 6.93E-16 | postive  |
| BIRC5    | TYMSOS       | 0.439817589  | 3.59E-19 | postive  |
| ATG16L2  | CTBP1-AS     | 0.617564638  | 8.38E-41 | postive  |
| ATG2B    | CTBP1-AS     | 0.411239398  | 9.78E-17 | postive  |
| IKBKB    | CTBP1-AS     | 0.491726138  | 3.17E-24 | postive  |
| TSC1     | CTBP1-AS     | 0.431976315  | 1.77E-18 | postive  |
| ATG16L2  | NARF-IT1     | 0.528942455  | 2.03E-28 | postive  |
| TSC1     | NARF-IT1     | 0.464100519  | 1.99E-21 | postive  |
| ATIC     | AC099850.3   | 0.428081704  | 3.83E-18 | postive  |
| BIRC5    | AC099850.3   | 0.608157836  | 2.66E-39 | postive  |
| EIF4G1   | AC099850.3   | 0.464624434  | 1.77E-21 | postive  |
| PARP1    | AC099850.3   | 0.447192633  | 7.74E-20 | postive  |
| USP10    | AC099850.3   | 0.503343361  | 1.76E-25 | postive  |
| ATG16L2  | AC138393.2   | 0.409172343  | 1.44E-16 | postive  |
| ULK3     | UBL7-AS1     | 0.459707727  | 5.25E-21 | postive  |
| IFNG     | MMP25-AS1    | 0.408123764  | 1.75E-16 | postive  |
| CTSD     | AL592148.3   | -0.428553426 | 3.49E-18 | negative |

|         |             |              |          |          |
|---------|-------------|--------------|----------|----------|
| MLST8   | AL592148.3  | -0.444258828 | 1.43E-19 | negative |
| ATG9B   | AP002761.4  | 0.40273463   | 4.69E-16 | postive  |
| CAPN1   | AP002761.4  | 0.424814535  | 7.29E-18 | postive  |
| TP63    | AP002761.4  | 0.585806647  | 6.32E-36 | postive  |
| ARSB    | CHROMR      | 0.480791348  | 4.35E-23 | postive  |
| BCL2    | CHROMR      | 0.419091472  | 2.21E-17 | postive  |
| DLC1    | CHROMR      | 0.419644453  | 1.99E-17 | postive  |
| ITPR1   | CHROMR      | 0.522393517  | 1.21E-27 | postive  |
| MAP1LC3 | ST3GAL6-AS1 | 0.407189297  | 2.07E-16 | postive  |
| ATG16L2 | MIR600HG    | 0.499400369  | 4.76E-25 | postive  |
| BCL2    | MIR600HG    | 0.505035944  | 1.15E-25 | postive  |
| TSC1    | MIR600HG    | 0.521520738  | 1.53E-27 | postive  |
| ATG16L2 | AC008569.2  | 0.582298493  | 2.03E-35 | postive  |
| BCL2    | AC008569.2  | 0.473486533  | 2.38E-22 | postive  |
| CFLAR   | AC008569.2  | 0.42341727   | 9.57E-18 | postive  |
| GRID1   | AL022157.1  | 0.442607978  | 2.02E-19 | postive  |
| WIPI2   | ZFAND2A-DT  | 0.529325221  | 1.82E-28 | postive  |
| RAB24   | AC005540.1  | 0.543107484  | 3.71E-30 | postive  |
| ATG16L2 | LINC00216   | 0.490299788  | 4.48E-24 | postive  |
| DLC1    | MEG3        | 0.482097304  | 3.20E-23 | postive  |
| ITPR1   | MEG3        | 0.417297224  | 3.11E-17 | postive  |
| ATG16L2 | AL450344.2  | 0.45458031   | 1.60E-20 | postive  |
| MAP1LC3 | AL450344.2  | 0.411839669  | 8.74E-17 | postive  |
| ARSB    | AC018752.1  | 0.459134627  | 5.95E-21 | postive  |
| ATG2B   | AC018752.1  | 0.465647889  | 1.41E-21 | postive  |
| BCL2    | AC018752.1  | 0.452663088  | 2.42E-20 | postive  |
| CAPNS1  | AC018752.1  | -0.41017194  | 1.19E-16 | negative |
| DLC1    | AC018752.1  | 0.525545004  | 5.14E-28 | postive  |
| HSPB8   | AC018752.1  | 0.430034909  | 2.60E-18 | postive  |
| ITPR1   | AC018752.1  | 0.595323272  | 2.49E-37 | postive  |
| ULK2    | AC018752.1  | 0.471862517  | 3.45E-22 | postive  |
| WDFY3   | AC018752.1  | 0.452678449  | 2.41E-20 | postive  |
| ARSB    | MAP3K4-AS1  | 0.406443961  | 2.38E-16 | postive  |
| PEA15   | MAP3K4-AS1  | 0.424517821  | 7.72E-18 | postive  |
| MAP1LC3 | AC121247.1  | 0.421516956  | 1.38E-17 | postive  |
| TSC1    | AC107068.1  | 0.428989054  | 3.20E-18 | postive  |
| ATG2B   | LINC02035   | 0.400928788  | 6.50E-16 | postive  |
| BIRC6   | LINC02035   | 0.424909386  | 7.15E-18 | postive  |
| ITPR1   | LINC02035   | 0.405547375  | 2.81E-16 | postive  |
| KLHL24  | LINC02035   | 0.589973355  | 1.55E-36 | postive  |
| NBR1    | LINC02035   | 0.409360436  | 1.39E-16 | postive  |
| PIK3R4  | LINC02035   | 0.400495685  | 7.03E-16 | postive  |
| TSC1    | LINC02035   | 0.415257316  | 4.59E-17 | postive  |
| ULK2    | LINC02035   | 0.428430299  | 3.58E-18 | postive  |

|         |            |              |          |          |
|---------|------------|--------------|----------|----------|
| WDFY3   | LINC02035  | 0.467105843  | 1.01E-21 | postive  |
| ITPR1   | SNHG15     | -0.408369313 | 1.67E-16 | negative |
| ZFYVE1  | SNHG15     | -0.410371722 | 1.15E-16 | negative |
| ATG16L2 | AC020978.3 | 0.430580089  | 2.33E-18 | postive  |
| ATG16L2 | AL360181.2 | 0.599047966  | 6.81E-38 | postive  |
| ATG2B   | AL360181.2 | 0.405747851  | 2.70E-16 | postive  |
| BIRC6   | AL360181.2 | 0.42615384   | 5.60E-18 | postive  |
| IKBKB   | AL360181.2 | 0.42639608   | 5.34E-18 | postive  |
| TSC1    | AL360181.2 | 0.459976147  | 4.95E-21 | postive  |
| ARSB    | AC087286.2 | 0.54779075   | 9.48E-31 | postive  |
| ATIC    | AC087286.2 | -0.400239249 | 7.37E-16 | negative |
| BCL2    | AC087286.2 | 0.417655495  | 2.91E-17 | postive  |
| BIRC5   | AC087286.2 | -0.464936071 | 1.65E-21 | negative |
| CFLAR   | AC087286.2 | 0.429292714  | 3.01E-18 | postive  |
| DLC1    | AC087286.2 | 0.613938775  | 3.22E-40 | postive  |
| GABARAP | AC087286.2 | 0.405714799  | 2.72E-16 | postive  |
| ITPR1   | AC087286.2 | 0.555992634  | 8.24E-32 | postive  |
| ULK2    | AC087286.2 | 0.414816679  | 4.99E-17 | postive  |
| ZFYVE1  | AC087286.2 | 0.406059682  | 2.55E-16 | postive  |
| MAP1LC3 | AL356481.2 | 0.4313023    | 2.02E-18 | postive  |
| HSPA8   | AC090559.2 | -0.41259024  | 7.59E-17 | negative |
| ATG16L2 | AC034102.6 | 0.435402926  | 8.85E-19 | postive  |
| ATG16L2 | LINC00926  | 0.55887192   | 3.44E-32 | postive  |
| BCL2    | LINC00926  | 0.643412568  | 3.32E-45 | postive  |
| CXCR4   | LINC00926  | 0.665174172  | 2.97E-49 | postive  |
| ITPR1   | LINC00926  | 0.415139041  | 4.69E-17 | postive  |
| MAP1LC3 | LINC00926  | 0.409662917  | 1.31E-16 | postive  |
| ATG2B   | AC093110.1 | 0.480391811  | 4.78E-23 | postive  |
| BIRC6   | AC093110.1 | 0.427474562  | 4.32E-18 | postive  |
| TSC1    | AC093110.1 | 0.424944182  | 7.11E-18 | postive  |
| MAP1LC3 | AC018462.1 | 0.507708456  | 5.79E-26 | postive  |
| ARSB    | AC010478.1 | 0.470112524  | 5.14E-22 | postive  |
| BCL2    | AC010478.1 | 0.480143664  | 5.06E-23 | postive  |
| DLC1    | AC010478.1 | 0.632794023  | 2.40E-43 | postive  |
| GABARAP | AC010478.1 | 0.420251996  | 1.77E-17 | postive  |
| HDAC1   | AC010478.1 | -0.401967537 | 5.39E-16 | negative |
| HSPA5   | AC010478.1 | -0.42030253  | 1.75E-17 | negative |
| HSPB8   | AC010478.1 | 0.712791352  | 2.00E-59 | postive  |
| ITPR1   | AC010478.1 | 0.656549686  | 1.31E-47 | postive  |
| NRG2    | AC010478.1 | 0.439327454  | 3.98E-19 | postive  |
| PEA15   | AC010478.1 | 0.483516513  | 2.28E-23 | postive  |
| ULK2    | AC010478.1 | 0.516984446  | 5.14E-27 | postive  |
| ZFYVE1  | AC010478.1 | 0.405350705  | 2.91E-16 | postive  |
| BCL2    | AC119396.1 | 0.445678566  | 1.06E-19 | postive  |

|          |              |              |          |          |
|----------|--------------|--------------|----------|----------|
| CXCR4    | AC119396.1   | 0.442529664  | 2.05E-19 | postive  |
| GAPDH    | BACH1-IT1    | -0.410920194 | 1.04E-16 | negative |
| MLST8    | BACH1-IT1    | -0.418691393 | 2.39E-17 | negative |
| MAP1LC3  | AL391095.3   | 0.434373868  | 1.09E-18 | postive  |
| MAP2K7   | AL137058.2   | 0.422638308  | 1.11E-17 | postive  |
| MAPK8IP1 | AL137058.2   | 0.505764491  | 9.53E-26 | postive  |
| CAPN10   | AL121906.2   | 0.402234941  | 5.13E-16 | postive  |
| ATG16L2  | LINC01089    | 0.486787041  | 1.05E-23 | postive  |
| PARP1    | LINC02542    | 0.66567759   | 2.37E-49 | postive  |
| RGS19    | LINC02542    | 0.76972137   | 1.05E-74 | postive  |
| ARSB     | AC090877.2   | 0.57593356   | 1.62E-34 | postive  |
| DLC1     | AC090877.2   | 0.520023387  | 2.29E-27 | postive  |
| HSPB8    | AC090877.2   | 0.40290208   | 4.55E-16 | postive  |
| ITPR1    | AC090877.2   | 0.47884364   | 6.87E-23 | postive  |
| PEA15    | AC090877.2   | 0.454824311  | 1.52E-20 | postive  |
| ULK1     | ARHGAP31-AS1 | 0.459986092  | 4.94E-21 | postive  |
| WIPI2    | AC092171.2   | 0.443734951  | 1.60E-19 | postive  |
| ATG16L2  | ITGB2-AS1    | 0.424781203  | 7.34E-18 | postive  |
| BCL2     | ITGB2-AS1    | 0.456908505  | 9.67E-21 | postive  |
| CXCR4    | ITGB2-AS1    | 0.520715754  | 1.90E-27 | postive  |
| PARP1    | ITGB2-AS1    | 0.418051161  | 2.70E-17 | postive  |
| RGS19    | ITGB2-AS1    | 0.67974157   | 3.68E-52 | postive  |
| P4HB     | AGBL5-IT1    | -0.433147135 | 1.40E-18 | negative |
| RHEB     | LINC01003    | 0.412508111  | 7.71E-17 | postive  |
| ATG16L2  | AC007390.1   | 0.501700679  | 2.67E-25 | postive  |
| ATG2B    | AC007390.1   | 0.42448233   | 7.78E-18 | postive  |
| BIRC6    | AC007390.1   | 0.438391982  | 4.82E-19 | postive  |
| TSC1     | AC007390.1   | 0.458803589  | 6.40E-21 | postive  |
| ARSB     | CNN3-DT      | 0.520575488  | 1.97E-27 | postive  |
| DLC1     | CNN3-DT      | 0.519192337  | 2.86E-27 | postive  |
| HSPB8    | CNN3-DT      | 0.643452108  | 3.27E-45 | postive  |
| ITPR1    | CNN3-DT      | 0.510359985  | 2.92E-26 | postive  |
| PEA15    | CNN3-DT      | 0.47197664   | 3.36E-22 | postive  |
| ULK2     | CNN3-DT      | 0.437604193  | 5.66E-19 | postive  |
| IFNG     | LINC02154    | 0.423361755  | 9.68E-18 | postive  |
| RGS19    | AC131011.1   | 0.439764707  | 3.63E-19 | postive  |
| ATG16L2  | AL135818.1   | 0.440910806  | 2.87E-19 | postive  |
| BCL2     | AL135818.1   | 0.493284053  | 2.16E-24 | postive  |
| CCR2     | AL135818.1   | 0.546207061  | 1.51E-30 | postive  |
| CFLAR    | AL135818.1   | 0.535593935  | 3.17E-29 | postive  |
| CXCR4    | AL135818.1   | 0.429348285  | 2.98E-18 | postive  |
| FAS      | AL135818.1   | 0.474601919  | 1.84E-22 | postive  |
| NLRC4    | AL135818.1   | 0.498778244  | 5.56E-25 | postive  |
| RGS19    | AL135818.1   | 0.456860697  | 9.78E-21 | postive  |

|         |             |              |          |          |
|---------|-------------|--------------|----------|----------|
| ARSB    | AC106739.1  | 0.40905423   | 1.47E-16 | postive  |
| PINK1   | AC106739.1  | 0.408927466  | 1.50E-16 | postive  |
| SPNS1   | AC106739.1  | 0.411083176  | 1.01E-16 | postive  |
| ATG16L2 | FAF1-AS1    | 0.403831392  | 3.84E-16 | postive  |
| ATG16L2 | AL132989.1  | 0.630999957  | 4.87E-43 | postive  |
| ATG2B   | AL132989.1  | 0.559138442  | 3.17E-32 | postive  |
| BCL2    | AL132989.1  | 0.420634783  | 1.64E-17 | postive  |
| BIRC6   | AL132989.1  | 0.428109468  | 3.81E-18 | postive  |
| CFLAR   | AL132989.1  | 0.498353565  | 6.18E-25 | postive  |
| IKBKB   | AL132989.1  | 0.443309628  | 1.75E-19 | postive  |
| MLST8   | AL132989.1  | -0.412902655 | 7.16E-17 | negative |
| TSC1    | AL132989.1  | 0.495027668  | 1.41E-24 | postive  |
| ATG16L2 | AC104564.1  | 0.408975611  | 1.49E-16 | postive  |
| MAP1LC3 | AC104564.1  | 0.400047917  | 7.62E-16 | postive  |
| MAP2K7  | AC004854.2  | 0.424508794  | 7.74E-18 | postive  |
| WIPI2   | AC004854.2  | 0.408215581  | 1.72E-16 | postive  |
| TSC1    | AL359091.3  | 0.432032424  | 1.75E-18 | postive  |
| ATG5    | PVT1        | 0.495359518  | 1.30E-24 | postive  |
| MYC     | PVT1        | 0.506037636  | 8.88E-26 | postive  |
| ATG16L2 | AC092375.2  | 0.402542442  | 4.86E-16 | postive  |
| BCL2    | SENCR       | 0.513605617  | 1.25E-26 | postive  |
| CCL2    | SENCR       | 0.477233768  | 1.00E-22 | postive  |
| CCR2    | SENCR       | 0.497361332  | 7.91E-25 | postive  |
| CXCR4   | SENCR       | 0.475335812  | 1.55E-22 | postive  |
| DLC1    | SENCR       | 0.450858058  | 3.56E-20 | postive  |
| ITPR1   | SENCR       | 0.531460705  | 1.01E-28 | postive  |
| MAP1LC3 | SENCR       | 0.415442928  | 4.43E-17 | postive  |
| PEA15   | SENCR       | 0.509261035  | 3.88E-26 | postive  |
| GRID1   | AC007566.1  | 0.401766834  | 5.59E-16 | postive  |
| CASP4   | LINC02195   | 0.472876901  | 2.73E-22 | postive  |
| CX3CL1  | LINC02195   | 0.623028706  | 1.06E-41 | postive  |
| IFNG    | LINC02195   | 0.657524176  | 8.59E-48 | postive  |
| TNFSF10 | LINC02195   | 0.538573046  | 1.36E-29 | postive  |
| BAG3    | AC021739.2  | 0.48281675   | 2.70E-23 | postive  |
| ATG16L2 | AL031775.2  | 0.459654992  | 5.31E-21 | postive  |
| GRID1   | AC087239.1  | 0.465060078  | 1.60E-21 | postive  |
| DLC1    | LINC01096   | 0.434657779  | 1.03E-18 | postive  |
| HSPB8   | LINC01096   | 0.430792073  | 2.24E-18 | postive  |
| GRID1   | PRKAR1B-AS1 | 0.494069024  | 1.79E-24 | postive  |
| PARP1   | PRKAR1B-AS1 | 0.45679197   | 9.92E-21 | postive  |
| RGS19   | PRKAR1B-AS1 | 0.624717303  | 5.58E-42 | postive  |
| CAPN10  | PANK2-AS1   | 0.487619481  | 8.57E-24 | postive  |
| CX3CL1  | AC007991.2  | 0.537495221  | 1.85E-29 | postive  |
| BIRC5   | AL133355.1  | -0.403651741 | 3.97E-16 | negative |

|         |            |              |           |          |
|---------|------------|--------------|-----------|----------|
| ITPR1   | AL133355.1 | 0.4081694    | 1.73E-16  | postive  |
| ATG16L2 | AL023653.1 | 0.527011403  | 3.45E-28  | postive  |
| BCL2    | AL023653.1 | 0.580020829  | 4.29E-35  | postive  |
| CFLAR   | AL023653.1 | 0.410829202  | 1.06E-16  | postive  |
| CXCR4   | AL023653.1 | 0.553716278  | 1.63E-31  | postive  |
| MAP1LC3 | AL023653.1 | 0.471151524  | 4.06E-22  | postive  |
| ATG16L2 | U62631.1   | 0.503767307  | 1.58E-25  | postive  |
| BCL2    | U62631.1   | 0.562801976  | 1.03E-32  | postive  |
| CXCR4   | U62631.1   | 0.53772522   | 1.73E-29  | postive  |
| DLC1    | AC005180.1 | 0.473162116  | 2.56E-22  | postive  |
| HSPB8   | AC005180.1 | 0.738414499  | 8.32E-66  | postive  |
| ITPR1   | AC005180.1 | 0.561068878  | 1.76E-32  | postive  |
| NRG2    | AC005180.1 | 0.45520735   | 1.40E-20  | postive  |
| ULK2    | AC005180.1 | 0.408061865  | 1.77E-16  | postive  |
| DLC1    | AC002398.2 | 0.618779928  | 5.31E-41  | postive  |
| GABARAP | AC002398.2 | 0.46845903   | 7.47E-22  | postive  |
| HDAC1   | AC002398.2 | -0.418980737 | 2.26E-17  | negative |
| HSPB8   | AC002398.2 | 0.841116196  | 1.35E-101 | postive  |
| ITPR1   | AC002398.2 | 0.592146814  | 7.41E-37  | postive  |
| NRG2    | AC002398.2 | 0.469938932  | 5.34E-22  | postive  |
| PEA15   | AC002398.2 | 0.435412407  | 8.83E-19  | postive  |
| ULK2    | AC002398.2 | 0.491765549  | 3.14E-24  | postive  |
| ATG16L2 | AC137932.1 | 0.568353083  | 1.82E-33  | postive  |
| ATG2B   | AC137932.1 | 0.469700419  | 5.64E-22  | postive  |
| TSC1    | AC137932.1 | 0.442090856  | 2.25E-19  | postive  |
| GABARAP | NAPA-AS1   | 0.414945964  | 4.87E-17  | postive  |
| MAP1LC3 | TMED2-DT   | 0.421770306  | 1.32E-17  | postive  |
| BCL2    | AC090044.1 | 0.482662474  | 2.80E-23  | postive  |
| DLC1    | AC090044.1 | 0.532815466  | 6.92E-29  | postive  |
| HSPB8   | AC090044.1 | 0.649380552  | 2.78E-46  | postive  |
| ITPR1   | AC090044.1 | 0.636224247  | 6.13E-44  | postive  |
| NRG2    | AC090044.1 | 0.481725949  | 3.49E-23  | postive  |
| ULK2    | AC090044.1 | 0.465345275  | 1.50E-21  | postive  |
| ATG16L2 | AC090948.1 | 0.603115715  | 1.62E-38  | postive  |
| BCL2    | AC090948.1 | 0.587742077  | 3.30E-36  | postive  |
| CFLAR   | AC090948.1 | 0.505083864  | 1.13E-25  | postive  |
| CXCR4   | AC090948.1 | 0.50651174   | 7.87E-26  | postive  |
| ITPR1   | AC090948.1 | 0.457807957  | 7.95E-21  | postive  |
| PARP1   | LINC02416  | 0.41345598   | 6.45E-17  | postive  |
| RGS19   | LINC02416  | 0.526410931  | 4.06E-28  | postive  |
| ARSB    | AL139220.2 | 0.450399599  | 3.93E-20  | postive  |
| DLC1    | AL139220.2 | 0.551604791  | 3.07E-31  | postive  |
| GABARAP | AL139220.2 | 0.40606675   | 2.55E-16  | postive  |
| HSPB8   | AL139220.2 | 0.555495318  | 9.57E-32  | postive  |



|         |            |              |          |          |
|---------|------------|--------------|----------|----------|
| ITGB1   | AL139220.2 | 0.416076932  | 3.93E-17 | postive  |
| ITPR1   | AL139220.2 | 0.517328735  | 4.69E-27 | postive  |
| ULK2    | AL139220.2 | 0.419931417  | 1.88E-17 | postive  |
| HSPA8   | AC134407.1 | -0.412336503 | 7.96E-17 | negative |
| ATG16L2 | LINC00106  | 0.407729717  | 1.88E-16 | postive  |
| RAB24   | LINC00106  | 0.431818589  | 1.82E-18 | postive  |
| DLC1    | AC093702.1 | 0.552662413  | 2.24E-31 | postive  |
| HSPB8   | AC093702.1 | 0.674480513  | 4.31E-51 | postive  |
| PEA15   | AC093702.1 | 0.426542154  | 5.19E-18 | postive  |
| ULK2    | AC093702.1 | 0.417081794  | 3.24E-17 | postive  |
| ATG16L2 | DHDDS-AS1  | 0.571285739  | 7.20E-34 | postive  |
| BCL2    | DHDDS-AS1  | 0.424337375  | 8.00E-18 | postive  |
| MAP1LC3 | DHDDS-AS1  | 0.419033616  | 2.23E-17 | postive  |
| ULK1    | AL161729.1 | 0.433094355  | 1.41E-18 | postive  |
| ATG12   | AC008906.1 | 0.425114671  | 6.87E-18 | postive  |
| ATG16L2 | AC008906.1 | 0.402878811  | 4.57E-16 | postive  |
| CFLAR   | AC008906.1 | 0.424858442  | 7.23E-18 | postive  |
| ATG16L2 | AL021707.8 | 0.582302479  | 2.03E-35 | postive  |
| CFLAR   | AL021707.8 | 0.464798108  | 1.70E-21 | postive  |
| MAP1LC3 | AC022182.2 | 0.540592932  | 7.65E-30 | postive  |
| ATG16L2 | AC007533.1 | 0.453949725  | 1.84E-20 | postive  |
| ATG16L2 | AC025917.1 | 0.679744272  | 3.67E-52 | postive  |
| ATG2B   | AC025917.1 | 0.51558856   | 7.43E-27 | postive  |
| BCL2    | AC025917.1 | 0.510139475  | 3.09E-26 | postive  |
| BIRC6   | AC025917.1 | 0.483619701  | 2.23E-23 | postive  |
| CFLAR   | AC025917.1 | 0.529924474  | 1.54E-28 | postive  |
| EDEM1   | AC025917.1 | 0.417420611  | 3.04E-17 | postive  |
| IKBKB   | AC025917.1 | 0.459893172  | 5.04E-21 | postive  |
| ITPR1   | AC025917.1 | 0.4555871    | 1.29E-20 | postive  |
| TSC1    | AC025917.1 | 0.430619219  | 2.32E-18 | postive  |
| ARSB    | AC131097.3 | 0.418167673  | 2.64E-17 | postive  |
| GRID1   | AC131097.3 | 0.432654242  | 1.54E-18 | postive  |
| ATG16L2 | AC009690.2 | 0.438134926  | 5.08E-19 | postive  |
| ATG16L2 | MIR155HG   | 0.437779792  | 5.46E-19 | postive  |
| BCL2    | MIR155HG   | 0.410492299  | 1.12E-16 | postive  |
| CXCR4   | MIR155HG   | 0.463849066  | 2.10E-21 | postive  |
| MAP1LC3 | MIR155HG   | 0.442193783  | 2.20E-19 | postive  |
| ATG16L2 | GHRLOS     | 0.439847674  | 3.57E-19 | postive  |
| MAP1LC3 | MRPS9-AS1  | 0.406611536  | 2.31E-16 | postive  |
| CAPN10  | AC084125.2 | 0.416705934  | 3.49E-17 | postive  |
| HSPB8   | LOH12CR2   | 0.41550308   | 4.38E-17 | postive  |
| HIF1A   | CFAP58-DT  | 0.436005655  | 7.83E-19 | postive  |
| TP63    | CFAP58-DT  | 0.407974249  | 1.79E-16 | postive  |
| ATG16L2 | AL078581.4 | 0.433424322  | 1.32E-18 | postive  |

|          |            |              |          |          |
|----------|------------|--------------|----------|----------|
| ATIC     | OGFRP1     | 0.400641112  | 6.85E-16 | postive  |
| EIF4G1   | OGFRP1     | 0.41445841   | 5.34E-17 | postive  |
| TSC1     | MCM3AP-AS1 | 0.483375698  | 2.36E-23 | postive  |
| ATG16L2  | LINC01772  | 0.491694439  | 3.19E-24 | postive  |
| CFLAR    | LINC01772  | 0.421389464  | 1.42E-17 | postive  |
| GAPDH    | LINC01772  | -0.426110449 | 5.65E-18 | negative |
| P4HB     | LINC01772  | -0.441701919 | 2.44E-19 | negative |
| ATG4B    | AC010973.2 | 0.457253566  | 8.97E-21 | postive  |
| CAPN10   | AC010973.2 | 0.426055218  | 5.71E-18 | postive  |
| GRID1    | AC092794.1 | 0.509631356  | 3.53E-26 | postive  |
| PINK1    | AP000866.6 | -0.402540225 | 4.86E-16 | negative |
| MAP1LC3  | LINC01251  | 0.41644255   | 3.67E-17 | postive  |
| ATG16L2  | AC078778.1 | 0.43553451   | 8.62E-19 | postive  |
| ATG16L2  | AC011462.4 | 0.411489454  | 9.33E-17 | postive  |
| TSC1     | AC011462.4 | 0.411108121  | 1.00E-16 | postive  |
| ATG16L2  | AL049840.4 | 0.476978682  | 1.06E-22 | postive  |
| ATG2B    | AL049840.4 | 0.455514773  | 1.31E-20 | postive  |
| BIRC6    | AL049840.4 | 0.443214537  | 1.78E-19 | postive  |
| TSC2     | AL049840.4 | 0.428124799  | 3.80E-18 | postive  |
| HSP90AB1 | LINC02441  | 0.41145711   | 9.39E-17 | postive  |
| MAP2K7   | AC092720.1 | 0.452131941  | 2.71E-20 | postive  |
| MLST8    | AC092720.1 | 0.436778364  | 6.69E-19 | postive  |
| SPNS1    | AC092720.1 | 0.439988915  | 3.47E-19 | postive  |
| ATG16L2  | AC007496.1 | 0.482055403  | 3.23E-23 | postive  |
| CFLAR    | AC007496.1 | 0.410338626  | 1.16E-16 | postive  |
| ATG5     | Z98200.1   | 0.441000035  | 2.82E-19 | postive  |
| FOXO3    | Z98200.1   | 0.413874303  | 5.96E-17 | postive  |
| FADD     | AP000487.1 | 0.599293688  | 6.25E-38 | postive  |
| MAPK8IP1 | AP000487.1 | 0.430586678  | 2.33E-18 | postive  |
| ARSB     | AC080038.1 | 0.435697667  | 8.34E-19 | postive  |
| DLC1     | AC080038.1 | 0.51430013   | 1.04E-26 | postive  |
| GABARAP  | AC080038.1 | 0.421816059  | 1.31E-17 | postive  |
| ITPR1    | AC080038.1 | 0.466466513  | 1.17E-21 | postive  |
| PEA15    | AC080038.1 | 0.421978748  | 1.27E-17 | postive  |
| ULK2     | AC080038.1 | 0.402536125  | 4.86E-16 | postive  |
| ATG16L2  | AC009087.1 | 0.426561591  | 5.17E-18 | postive  |
| BCL2     | LINC00092  | 0.614453768  | 2.66E-40 | postive  |
| CXCR4    | LINC00092  | 0.532545581  | 7.46E-29 | postive  |
| ITPR1    | LINC00092  | 0.585364881  | 7.33E-36 | postive  |
| MAP1LC3  | LINC00092  | 0.427103359  | 4.65E-18 | postive  |
| NRG2     | LINC00092  | 0.419636865  | 1.99E-17 | postive  |
| ARSB     | LINC02256  | 0.466028599  | 1.29E-21 | postive  |
| BCL2     | LINC02256  | 0.544173454  | 2.72E-30 | postive  |
| BIRC5    | LINC02256  | -0.414061547 | 5.75E-17 | negative |

|          |              |              |           |          |
|----------|--------------|--------------|-----------|----------|
| DLC1     | LINC02256    | 0.523311178  | 9.44E-28  | postive  |
| HSPA5    | LINC02256    | -0.420184596 | 1.79E-17  | negative |
| HSPB8    | LINC02256    | 0.589962697  | 1.56E-36  | postive  |
| ITPR1    | LINC02256    | 0.651767816  | 1.01E-46  | postive  |
| NRG2     | LINC02256    | 0.416751118  | 3.46E-17  | postive  |
| ULK2     | LINC02256    | 0.445593067  | 1.08E-19  | postive  |
| ARSB     | AP003071.3   | 0.453655379  | 1.96E-20  | postive  |
| BCL2     | AP003071.3   | 0.446379908  | 9.19E-20  | postive  |
| DLC1     | AP003071.3   | 0.706441227  | 5.97E-58  | postive  |
| GABARAP  | AP003071.3   | 0.450231796  | 4.07E-20  | postive  |
| HDAC1    | AP003071.3   | -0.437064796 | 6.31E-19  | negative |
| HSPA5    | AP003071.3   | -0.410055197 | 1.22E-16  | negative |
| HSPB8    | AP003071.3   | 0.877094747  | 7.63E-121 | postive  |
| ITGB1    | AP003071.3   | 0.458613542  | 6.67E-21  | postive  |
| ITPR1    | AP003071.3   | 0.667043836  | 1.28E-49  | postive  |
| NRG2     | AP003071.3   | 0.47843935   | 7.55E-23  | postive  |
| PEA15    | AP003071.3   | 0.518302694  | 3.62E-27  | postive  |
| PINK1    | AP003071.3   | 0.439768509  | 3.63E-19  | postive  |
| ULK2     | AP003071.3   | 0.531388201  | 1.03E-28  | postive  |
| ZFYVE1   | AP003071.3   | 0.413522585  | 6.37E-17  | postive  |
| ATG16L2  | BET1-AS1     | 0.41967103   | 1.98E-17  | postive  |
| ATG16L2  | AC114760.2   | 0.597715994  | 1.08E-37  | postive  |
| BCL2     | AC114760.2   | 0.620837159  | 2.45E-41  | postive  |
| CFLAR    | AC114760.2   | 0.497054863  | 8.54E-25  | postive  |
| CXCR4    | AC114760.2   | 0.610422439  | 1.17E-39  | postive  |
| ITPR1    | AC114760.2   | 0.416546041  | 3.59E-17  | postive  |
| ARSB     | THBS4-AS1    | 0.455851287  | 1.22E-20  | postive  |
| BCL2     | THBS4-AS1    | 0.47237755   | 3.06E-22  | postive  |
| DLC1     | THBS4-AS1    | 0.529194435  | 1.89E-28  | postive  |
| HSPB8    | THBS4-AS1    | 0.413484222  | 6.42E-17  | postive  |
| ITPR1    | THBS4-AS1    | 0.578267435  | 7.61E-35  | postive  |
| MAP1LC3  | THBS4-AS1    | 0.413505313  | 6.39E-17  | postive  |
| PEA15    | THBS4-AS1    | 0.407657653  | 1.90E-16  | postive  |
| MAPK8IP1 | DNAJC3-DT    | 0.474297097  | 1.97E-22  | postive  |
| ATG16L2  | AC015871.3   | 0.430154568  | 2.54E-18  | postive  |
| GABARAP  | AC015922.3   | 0.420666088  | 1.63E-17  | postive  |
| ATG16L2  | HLA-DQB1-AS1 | 0.455753123  | 1.24E-20  | postive  |
| CXCR4    | HLA-DQB1-AS1 | 0.511178703  | 2.36E-26  | postive  |
| ITGA3    | SEPTIN9-DT   | 0.405927589  | 2.62E-16  | postive  |
| ATG4B    | AC007383.1   | 0.401427584  | 5.94E-16  | postive  |
| CAPN10   | AC007383.1   | 0.448534222  | 5.83E-20  | postive  |
| RAC1     | AC004130.2   | 0.417198444  | 3.17E-17  | postive  |
| ATG16L2  | AC004908.2   | 0.451729943  | 2.96E-20  | postive  |
| IKKBK    | AC004908.2   | 0.456147176  | 1.14E-20  | postive  |

|         |            |              |           |          |
|---------|------------|--------------|-----------|----------|
| TSC1    | AC004908.2 | 0.402169684  | 5.20E-16  | postive  |
| KLHL24  | MUC20-OT1  | 0.455508551  | 1.31E-20  | postive  |
| BCL2    | AF001548.1 | 0.404866246  | 3.18E-16  | postive  |
| DLC1    | AF001548.1 | 0.656076275  | 1.61E-47  | postive  |
| GABARAP | AF001548.1 | 0.400993393  | 6.43E-16  | postive  |
| HSPB8   | AF001548.1 | 0.86559214   | 4.33E-114 | postive  |
| ITGB1   | AF001548.1 | 0.444982712  | 1.23E-19  | postive  |
| ITPR1   | AF001548.1 | 0.607836573  | 2.99E-39  | postive  |
| NRG2    | AF001548.1 | 0.466990857  | 1.04E-21  | postive  |
| PEA15   | AF001548.1 | 0.419062409  | 2.22E-17  | postive  |
| ULK2    | AF001548.1 | 0.514184315  | 1.08E-26  | postive  |
| CCR2    | LINC00582  | 0.462002076  | 3.16E-21  | postive  |
| PINK1   | AL731577.2 | 0.481940223  | 3.32E-23  | postive  |
| GAPDH   | AC107375.1 | -0.408618158 | 1.59E-16  | negative |
| DLC1    | SAP30-DT   | 0.457450986  | 8.60E-21  | postive  |
| HSPB8   | SAP30-DT   | 0.688968771  | 4.32E-54  | postive  |
| ITPR1   | SAP30-DT   | 0.461172123  | 3.80E-21  | postive  |
| NRG2    | SAP30-DT   | 0.415102205  | 4.73E-17  | postive  |
| CTSB    | C8orf49    | 0.533563071  | 5.61E-29  | postive  |
| FOXO3   | AL359711.2 | 0.425304535  | 6.62E-18  | postive  |
| DLC1    | AC012085.2 | 0.408886714  | 1.52E-16  | postive  |
| HSPB8   | AC012085.2 | 0.603293127  | 1.52E-38  | postive  |
| ITPR1   | AC012085.2 | 0.42448124   | 7.78E-18  | postive  |
| ATG16L2 | AC093788.1 | 0.445659548  | 1.07E-19  | postive  |
| PINK1   | AC093788.1 | -0.435699587 | 8.33E-19  | negative |
| ATG16L2 | NFYC-AS1   | 0.521985012  | 1.35E-27  | postive  |
| BIRC6   | NFYC-AS1   | 0.408287736  | 1.69E-16  | postive  |
| TSC1    | NFYC-AS1   | 0.420584769  | 1.66E-17  | postive  |
| BAK1    | AC013403.2 | -0.406233819 | 2.47E-16  | negative |
| BCL2    | AC013403.2 | 0.415946771  | 4.03E-17  | postive  |
| DLC1    | AC013403.2 | 0.407286267  | 2.04E-16  | postive  |
| HSPB8   | AC013403.2 | 0.551337374  | 3.32E-31  | postive  |
| ITPR1   | AC013403.2 | 0.472525923  | 2.96E-22  | postive  |
| P4HB    | AC013403.2 | -0.475467316 | 1.51E-22  | negative |
| ULK2    | AC013403.2 | 0.406759037  | 2.25E-16  | postive  |
| ATG16L2 | AC004466.3 | 0.43207823   | 1.73E-18  | postive  |
| PRKCQ   | PRKCQ-AS1  | 0.748494315  | 1.58E-68  | postive  |
| ARSB    | LINC01081  | 0.459434932  | 5.57E-21  | postive  |
| BCL2    | LINC01081  | 0.436101158  | 7.68E-19  | postive  |
| DLC1    | LINC01081  | 0.631268073  | 4.38E-43  | postive  |
| GABARAP | LINC01081  | 0.470594249  | 4.60E-22  | postive  |
| HDAC1   | LINC01081  | -0.407594447 | 1.93E-16  | negative |
| HSPA5   | LINC01081  | -0.405729311 | 2.71E-16  | negative |
| HSPB8   | LINC01081  | 0.776937659  | 5.89E-77  | postive  |

|         |            |             |          |         |
|---------|------------|-------------|----------|---------|
| ITPR1   | LINC01081  | 0.612497521 | 5.48E-40 | postive |
| NRG2    | LINC01081  | 0.435682275 | 8.36E-19 | postive |
| PEA15   | LINC01081  | 0.431667891 | 1.88E-18 | postive |
| PINK1   | LINC01081  | 0.402876362 | 4.57E-16 | postive |
| ULK2    | LINC01081  | 0.462621697 | 2.76E-21 | postive |
| DLC1    | AC004637.1 | 0.544376624 | 2.57E-30 | postive |
| GABARAP | AC004637.1 | 0.40939157  | 1.38E-16 | postive |
| HSPB8   | AC004637.1 | 0.688839566 | 4.60E-54 | postive |
| ITPR1   | AC004637.1 | 0.522307779 | 1.24E-27 | postive |
| NRG2    | AC004637.1 | 0.451051835 | 3.42E-20 | postive |
| ULK2    | AC004637.1 | 0.503723382 | 1.60E-25 | postive |
| ATG16L2 | AC144548.1 | 0.401305363 | 6.08E-16 | postive |
| TSC1    | AC144548.1 | 0.451950514 | 2.82E-20 | postive |
| CDKN2A  | AC243964.3 | 0.414669282 | 5.13E-17 | postive |
| IL24    | AC005776.2 | 0.417098969 | 3.23E-17 | postive |
| DLC1    | AC005180.2 | 0.44284413  | 1.92E-19 | postive |
| HSPB8   | AC005180.2 | 0.746605693 | 5.24E-68 | postive |
| ITPR1   | AC005180.2 | 0.541708814 | 5.55E-30 | postive |
| NRG2    | AC005180.2 | 0.471932709 | 3.39E-22 | postive |
| ATG16L2 | FAM30A     | 0.576152346 | 1.51E-34 | postive |
| BCL2    | FAM30A     | 0.658074378 | 6.77E-48 | postive |
| CCR2    | FAM30A     | 0.440074693 | 3.41E-19 | postive |
| CFLAR   | FAM30A     | 0.407723044 | 1.88E-16 | postive |
| CXCR4   | FAM30A     | 0.677034182 | 1.31E-51 | postive |
| ITPR1   | FAM30A     | 0.453922178 | 1.85E-20 | postive |
| MAP1LC3 | FAM30A     | 0.410788942 | 1.06E-16 | postive |
| ATG16L2 | AC104564.3 | 0.463630063 | 2.21E-21 | postive |
| ATG2B   | AC234775.2 | 0.455070284 | 1.44E-20 | postive |
| DLC1    | AC234775.2 | 0.431010693 | 2.14E-18 | postive |
| KLHL24  | AC234775.2 | 0.418124793 | 2.66E-17 | postive |
| ULK2    | AC234775.2 | 0.440278896 | 3.27E-19 | postive |
| WDFY3   | AC234775.2 | 0.440168443 | 3.34E-19 | postive |
| ATG16L2 | C1orf220   | 0.457235944 | 9.01E-21 | postive |
| GABARAP | PITPNA-AS1 | 0.428233986 | 3.72E-18 | postive |
| ATG16L2 | LINC01215  | 0.548760333 | 7.12E-31 | postive |
| BCL2    | LINC01215  | 0.663381843 | 6.59E-49 | postive |
| CXCR4   | LINC01215  | 0.67761695  | 1.00E-51 | postive |
| ITPR1   | LINC01215  | 0.435315687 | 9.01E-19 | postive |
| ATG16L2 | AL450263.1 | 0.459325605 | 5.71E-21 | postive |
| ATG2B   | AL450263.1 | 0.467172924 | 9.99E-22 | postive |
| BIRC6   | AL450263.1 | 0.510671653 | 2.69E-26 | postive |
| KLHL24  | AL450263.1 | 0.412197486 | 8.17E-17 | postive |
| TSC1    | AL450263.1 | 0.520350966 | 2.10E-27 | postive |
| DIRAS3  | GIHCG      | 0.459374931 | 5.64E-21 | postive |

|          |            |              |          |          |
|----------|------------|--------------|----------|----------|
| GABARAP  | GIHCG      | 0.456626226  | 1.03E-20 | postive  |
| GRID1    | GIHCG      | 0.499480867  | 4.66E-25 | postive  |
| HSPB8    | GIHCG      | 0.428269459  | 3.69E-18 | postive  |
| NRG2     | GIHCG      | 0.490406742  | 4.37E-24 | postive  |
| PEA15    | GIHCG      | 0.416053655  | 3.95E-17 | postive  |
| CX3CL1   | AC007991.4 | 0.551714296  | 2.97E-31 | postive  |
| IFNG     | AC007991.4 | 0.412138431  | 8.26E-17 | postive  |
| HSPA8    | AC007036.2 | -0.407468874 | 1.97E-16 | negative |
| CCL2     | AL583785.1 | 0.404876059  | 3.17E-16 | postive  |
| DLC1     | AL583785.1 | 0.546140098  | 1.54E-30 | postive  |
| ITPR1    | AL583785.1 | 0.436039261  | 7.78E-19 | postive  |
| PEA15    | AL583785.1 | 0.407517456  | 1.95E-16 | postive  |
| SIRT1    | AC026368.1 | 0.456816127  | 9.87E-21 | postive  |
| ATG16L2  | AC006017.1 | 0.538157329  | 1.53E-29 | postive  |
| ATG2B    | AC006017.1 | 0.407839274  | 1.84E-16 | postive  |
| DLC1     | AC009549.1 | 0.507358561  | 6.33E-26 | postive  |
| GABARAP  | AC009549.1 | 0.438476206  | 4.73E-19 | postive  |
| HSPB8    | AC009549.1 | 0.732301597  | 3.23E-64 | postive  |
| ITGB1    | AC009549.1 | 0.518879213  | 3.11E-27 | postive  |
| ITPR1    | AC009549.1 | 0.472084371  | 3.28E-22 | postive  |
| PEA15    | AC009549.1 | 0.49512417   | 1.38E-24 | postive  |
| PINK1    | AC009549.1 | 0.403395151  | 4.16E-16 | postive  |
| ULK2     | AC009549.1 | 0.408718958  | 1.56E-16 | postive  |
| ATG16L2  | HCG25      | 0.41730851   | 3.11E-17 | postive  |
| ATG16L2  | AL513327.1 | 0.438757222  | 4.47E-19 | postive  |
| ATG2B    | AL513327.1 | 0.525618554  | 5.04E-28 | postive  |
| GOPC     | AL513327.1 | 0.401487292  | 5.88E-16 | postive  |
| HIF1A    | AL513327.1 | 0.411929637  | 8.59E-17 | postive  |
| IL24     | AL513327.1 | 0.428750702  | 3.36E-18 | postive  |
| TSC1     | AL513327.1 | 0.456735804  | 1.00E-20 | postive  |
| BAX      | AC005256.1 | 0.41683344   | 3.40E-17 | postive  |
| TSC1     | AC093752.2 | 0.448809448  | 5.50E-20 | postive  |
| DLC1     | PCAT19     | 0.493329945  | 2.14E-24 | postive  |
| GABARAP  | PCAT19     | 0.403089407  | 4.40E-16 | postive  |
| PINK1    | SNHG12     | -0.410128102 | 1.20E-16 | negative |
| ATG16L2  | SDCBP2-AS1 | 0.411721801  | 8.93E-17 | postive  |
| WIPI2    | AC093627.5 | 0.477428229  | 9.55E-23 | postive  |
| BCL2     | ZNF236-DT  | 0.425016089  | 7.01E-18 | postive  |
| MAPK8IP1 | AC007128.2 | 0.509387795  | 3.75E-26 | postive  |
| PEX3     | AC007128.2 | 0.402838939  | 4.60E-16 | postive  |
| WIPI2    | AC007128.2 | 0.408312364  | 1.69E-16 | postive  |
| ATG16L2  | AL158163.1 | 0.522282012  | 1.25E-27 | postive  |
| GAPDH    | AL158163.1 | -0.44419385  | 1.45E-19 | negative |
| MLST8    | AL158163.1 | -0.401445131 | 5.92E-16 | negative |

|          |            |              |          |          |
|----------|------------|--------------|----------|----------|
| P4HB     | AL158163.1 | -0.401547871 | 5.82E-16 | negative |
| KLHL24   | AC107027.3 | 0.431283446  | 2.03E-18 | postive  |
| PIK3R4   | AC107027.3 | 0.445114283  | 1.20E-19 | postive  |
| ARNT     | AC242426.2 | 0.478385582  | 7.64E-23 | postive  |
| CAPN10   | ZNRD2-AS1  | 0.433729258  | 1.24E-18 | postive  |
| IKBKB    | AC105206.2 | 0.417821341  | 2.82E-17 | postive  |
| CDKN2A   | TDRKH-AS1  | 0.446448847  | 9.06E-20 | postive  |
| ATG16L2  | AL031717.1 | 0.577679591  | 9.22E-35 | postive  |
| CFLAR    | AL031717.1 | 0.459043904  | 6.07E-21 | postive  |
| TSC2     | AL031717.1 | 0.458702865  | 6.54E-21 | postive  |
| CAPN10   | AC116025.2 | 0.431149972  | 2.08E-18 | postive  |
| PINK1    | AL354696.1 | -0.410089093 | 1.21E-16 | negative |
| MAP1LC3  | DIP2A-IT1  | 0.471024476  | 4.17E-22 | postive  |
| ULK2     | U91328.1   | 0.417456511  | 3.02E-17 | postive  |
| ARNT     | AC108449.2 | 0.451131231  | 3.36E-20 | postive  |
| ATG2B    | AC108449.2 | 0.510585931  | 2.75E-26 | postive  |
| BIRC6    | AC108449.2 | 0.511068196  | 2.43E-26 | postive  |
| IKBKB    | AC108449.2 | 0.53803418   | 1.59E-29 | postive  |
| MTOR     | AC108449.2 | 0.432903582  | 1.47E-18 | postive  |
| PIK3C3   | AC108449.2 | 0.435623535  | 8.46E-19 | postive  |
| RAF1     | AC108449.2 | 0.4018562    | 5.50E-16 | postive  |
| TSC1     | AC108449.2 | 0.460197418  | 4.71E-21 | postive  |
| WDFY3    | AC108449.2 | 0.499395661  | 4.76E-25 | postive  |
| GRID1    | SOCS2-AS1  | 0.503271058  | 1.80E-25 | postive  |
| FADD     | AL096828.1 | 0.427481664  | 4.31E-18 | postive  |
| MAP2K7   | AL096828.1 | 0.56486034   | 5.44E-33 | postive  |
| MAPK8IP1 | AL096828.1 | 0.676952833  | 1.36E-51 | postive  |
| PEX3     | AL096828.1 | 0.614607769  | 2.52E-40 | postive  |
| MAP1LC3  | TTC39C-AS1 | 0.567223261  | 2.60E-33 | postive  |
| DLC1     | AC022034.1 | 0.475915359  | 1.36E-22 | postive  |
| HSPB8    | AC022034.1 | 0.552814027  | 2.14E-31 | postive  |
| ITPR1    | AC022034.1 | 0.527541998  | 2.98E-28 | postive  |
| FOXO3    | ARMC2-AS1  | 0.517236737  | 4.81E-27 | postive  |
| HSPB8    | RGMB-AS1   | 0.463252041  | 2.40E-21 | postive  |
| ATG16L2  | LINC02576  | 0.516849251  | 5.33E-27 | postive  |
| BCL2     | LINC02576  | 0.53532177   | 3.42E-29 | postive  |
| CXCR4    | LINC02576  | 0.548397571  | 7.93E-31 | postive  |
| MAP1LC3  | LINC02576  | 0.531218805  | 1.08E-28 | postive  |
| MAP2K7   | AC079807.1 | 0.418481784  | 2.48E-17 | postive  |
| RELA     | AC079807.1 | 0.409165923  | 1.44E-16 | postive  |
| SPNS1    | AC079807.1 | 0.423966094  | 8.60E-18 | postive  |
| ATG16L2  | GARS1-DT   | 0.511268748  | 2.31E-26 | postive  |
| CFLAR    | GARS1-DT   | 0.406010074  | 2.58E-16 | postive  |
| ATG16L2  | CHRM3-AS2  | 0.553407328  | 1.79E-31 | postive  |

|         |            |             |          |         |
|---------|------------|-------------|----------|---------|
| BCL2    | CHRM3-AS2  | 0.534821639 | 3.94E-29 | postive |
| CFLAR   | CHRM3-AS2  | 0.415186486 | 4.65E-17 | postive |
| CXCR4   | CHRM3-AS2  | 0.552634891 | 2.26E-31 | postive |
| ARSB    | AL136084.2 | 0.524169946 | 7.48E-28 | postive |
| BCL2    | AL136084.2 | 0.414369715 | 5.43E-17 | postive |
| DLC1    | AL136084.2 | 0.686750637 | 1.28E-53 | postive |
| HSPB8   | AL136084.2 | 0.742344322 | 7.49E-67 | postive |
| ITGB1   | AL136084.2 | 0.443568428 | 1.65E-19 | postive |
| ITPR1   | AL136084.2 | 0.596266967 | 1.79E-37 | postive |
| PEA15   | AL136084.2 | 0.551467545 | 3.20E-31 | postive |
| PINK1   | AL136084.2 | 0.486575579 | 1.10E-23 | postive |
| ULK2    | AL136084.2 | 0.416650659 | 3.52E-17 | postive |
| ZFYVE1  | AL136084.2 | 0.401762464 | 5.59E-16 | postive |
| GRID1   | AC136475.1 | 0.401896755 | 5.46E-16 | postive |
| ATG16L2 | AC010260.1 | 0.441940499 | 2.32E-19 | postive |
| ATG16L2 | AC138932.4 | 0.418945664 | 2.27E-17 | postive |
| ATG16L2 | AL606834.2 | 0.44644681  | 9.06E-20 | postive |
| BCL2    | AL606834.2 | 0.483626387 | 2.23E-23 | postive |
| CXCR4   | AL606834.2 | 0.423659688 | 9.13E-18 | postive |
| HIF1A   | AP001434.1 | 0.406946044 | 2.17E-16 | postive |
| IL24    | AP001434.1 | 0.694273403 | 3.11E-55 | postive |
| SPHK1   | AP001434.1 | 0.411085848 | 1.01E-16 | postive |
| AMBRA1  | AC073046.1 | 0.401202624 | 6.19E-16 | postive |
| ATG2A   | AC073046.1 | 0.457178295 | 9.12E-21 | postive |
| EIF4G1  | AC073046.1 | 0.497134001 | 8.37E-25 | postive |
| HGS     | AC073046.1 | 0.415412791 | 4.46E-17 | postive |
| RPTOR   | AC073046.1 | 0.422853658 | 1.07E-17 | postive |
| SPNS1   | AC073046.1 | 0.458412755 | 6.97E-21 | postive |
| HIF1A   | RHOQ-AS1   | 0.409579376 | 1.33E-16 | postive |
| IL24    | RHOQ-AS1   | 0.800535177 | 5.88E-85 | postive |
| WIPI1   | RHOQ-AS1   | 0.432743769 | 1.51E-18 | postive |
| ATG16L2 | AC243960.1 | 0.536503794 | 2.45E-29 | postive |
| BCL2    | AC243960.1 | 0.666500491 | 1.64E-49 | postive |
| CCR2    | AC243960.1 | 0.43029835  | 2.47E-18 | postive |
| CFLAR   | AC243960.1 | 0.433885875 | 1.20E-18 | postive |
| CXCR4   | AC243960.1 | 0.705338136 | 1.07E-57 | postive |
| ITPR1   | AC243960.1 | 0.435652036 | 8.41E-19 | postive |
| MAP1LC3 | AC243960.1 | 0.464874572 | 1.67E-21 | postive |
| DLC1    | LINC01778  | 0.532489233 | 7.57E-29 | postive |
| HSPB8   | LINC01778  | 0.795209898 | 4.64E-83 | postive |
| ITPR1   | LINC01778  | 0.446900685 | 8.24E-20 | postive |
| NRG2    | LINC01778  | 0.43343723  | 1.32E-18 | postive |
| PEA15   | LINC01778  | 0.443715937 | 1.60E-19 | postive |
| ULK2    | LINC01778  | 0.412139849 | 8.26E-17 | postive |



|          |              |             |          |         |
|----------|--------------|-------------|----------|---------|
| ATG16L2  | AL359962.2   | 0.419320014 | 2.11E-17 | postive |
| BCL2     | AL359962.2   | 0.400589606 | 6.91E-16 | postive |
| CXCR4    | AL359962.2   | 0.41363     | 6.24E-17 | postive |
| ATG16L2  | LINC00861    | 0.592133716 | 7.45E-37 | postive |
| BCL2     | LINC00861    | 0.667776775 | 9.23E-50 | postive |
| CCR2     | LINC00861    | 0.407708291 | 1.89E-16 | postive |
| CFLAR    | LINC00861    | 0.433672857 | 1.26E-18 | postive |
| CXCR4    | LINC00861    | 0.667503923 | 1.04E-49 | postive |
| ITPR1    | LINC00861    | 0.441758954 | 2.41E-19 | postive |
| MAP1LC3  | LINC00861    | 0.416340133 | 3.74E-17 | postive |
| ATG16L2  | AP000763.3   | 0.4614457   | 3.58E-21 | postive |
| BCL2     | AC022706.1   | 0.421388861 | 1.42E-17 | postive |
| CCR2     | AC022706.1   | 0.453331322 | 2.10E-20 | postive |
| CXCR4    | AC022706.1   | 0.56203908  | 1.30E-32 | postive |
| GABARAP  | AC022706.1   | 0.403619776 | 3.99E-16 | postive |
| ATG16L2  | C3orf35      | 0.403278836 | 4.25E-16 | postive |
| ARSB     | AP001189.3   | 0.637162289 | 4.21E-44 | postive |
| BCL2     | AP001189.3   | 0.440683431 | 3.01E-19 | postive |
| DLC1     | AP001189.3   | 0.616833817 | 1.10E-40 | postive |
| ITPR1    | AP001189.3   | 0.558403053 | 3.97E-32 | postive |
| PEA15    | AP001189.3   | 0.46851031  | 7.39E-22 | postive |
| PINK1    | AP001189.3   | 0.42079232  | 1.59E-17 | postive |
| ZFYVE1   | AP001189.3   | 0.470718984 | 4.48E-22 | postive |
| ATG16L2  | TMEM161B-AS1 | 0.405546894 | 2.81E-16 | postive |
| GRID1    | CACNA1C-AS2  | 0.45054562  | 3.81E-20 | postive |
| MAP2K7   | AL391244.1   | 0.437570947 | 5.69E-19 | postive |
| MAPK8IP1 | AL391244.1   | 0.648373431 | 4.24E-46 | postive |
| ATG16L2  | AC027097.2   | 0.564711857 | 5.69E-33 | postive |
| BCL2     | AC027097.2   | 0.621374622 | 2.00E-41 | postive |
| CXCR4    | AC027097.2   | 0.529380316 | 1.80E-28 | postive |
| ITPR1    | AC027097.2   | 0.454007709 | 1.81E-20 | postive |
| MAP1LC3  | AC027097.2   | 0.458439194 | 6.93E-21 | postive |
| DIRAS3   | AC004803.1   | 0.426874501 | 4.86E-18 | postive |
| HSPB8    | AC004803.1   | 0.426507223 | 5.23E-18 | postive |
| ARSB     | IGFBP7-AS1   | 0.485671305 | 1.37E-23 | postive |
| BCL2     | IGFBP7-AS1   | 0.433751056 | 1.24E-18 | postive |
| DLC1     | IGFBP7-AS1   | 0.575353683 | 1.96E-34 | postive |
| GABARAP  | IGFBP7-AS1   | 0.429004227 | 3.19E-18 | postive |
| HSPB8    | IGFBP7-AS1   | 0.500384912 | 3.72E-25 | postive |
| ITPR1    | IGFBP7-AS1   | 0.531806736 | 9.16E-29 | postive |
| PEA15    | IGFBP7-AS1   | 0.570844287 | 8.29E-34 | postive |
| PARP1    | AP000593.3   | 0.462343532 | 2.93E-21 | postive |
| RGS19    | AP000593.3   | 0.427864187 | 4.00E-18 | postive |
| BCL2     | AC124312.2   | 0.408023191 | 1.78E-16 | postive |

|         |            |              |          |          |
|---------|------------|--------------|----------|----------|
| DLC1    | AC124312.2 | 0.412469095  | 7.77E-17 | postive  |
| HSPB8   | AC124312.2 | 0.492363374  | 2.71E-24 | postive  |
| ITPR1   | AC124312.2 | 0.528330975  | 2.40E-28 | postive  |
| ATG16L2 | AC093726.2 | 0.444187212  | 1.45E-19 | postive  |
| HSPA8   | AC002558.3 | -0.43278667  | 1.50E-18 | negative |
| DLC1    | AC026355.2 | 0.479338092  | 6.12E-23 | postive  |
| HSPB8   | AC026355.2 | 0.489026144  | 6.10E-24 | postive  |
| ITGB1   | AC026355.2 | 0.451890496  | 2.86E-20 | postive  |
| ATG16L2 | AP003170.3 | 0.417831131  | 2.81E-17 | postive  |
| ATG16L2 | AL157786.1 | 0.406366664  | 2.41E-16 | postive  |
| BIRC6   | AL157786.1 | 0.411502706  | 9.31E-17 | postive  |
| ARSB    | AL353593.1 | 0.465452406  | 1.47E-21 | postive  |
| DLC1    | AL353593.1 | 0.422653688  | 1.11E-17 | postive  |
| ITPR1   | AL353593.1 | 0.46998219   | 5.29E-22 | postive  |
| ATG16L2 | AC073517.1 | 0.408752076  | 1.55E-16 | postive  |
| BIRC5   | AC012073.1 | 0.433449947  | 1.31E-18 | postive  |
| CAPN10  | AC012073.1 | 0.409395147  | 1.38E-16 | postive  |
| PELP1   | AC012073.1 | 0.423523255  | 9.38E-18 | postive  |
| PIK3C3  | AC011815.1 | 0.413611285  | 6.26E-17 | postive  |
| CXCR4   | AC243960.3 | 0.409152582  | 1.44E-16 | postive  |
| FAS     | AC243960.3 | 0.452687335  | 2.41E-20 | postive  |
| IFNG    | AC243960.3 | 0.487183482  | 9.51E-24 | postive  |
| NLR4    | AC243960.3 | 0.460467657  | 4.44E-21 | postive  |
| ATG16L2 | AC018926.3 | 0.425605729  | 6.24E-18 | postive  |
| MAP1LC3 | AC008870.4 | 0.403544152  | 4.05E-16 | postive  |
| ATG16L2 | AC018926.1 | 0.568633754  | 1.67E-33 | postive  |
| BCL2    | AC018926.1 | 0.45423525   | 1.73E-20 | postive  |
| CFLAR   | AC018926.1 | 0.480468384  | 4.69E-23 | postive  |
| ATG16L2 | AP000873.3 | 0.482977646  | 2.60E-23 | postive  |
| ATG16L2 | AL158207.2 | 0.468002052  | 8.28E-22 | postive  |
| BCL2    | AL158207.2 | 0.509236549  | 3.90E-26 | postive  |
| CFLAR   | AL158207.2 | 0.424003362  | 8.54E-18 | postive  |
| CXCR4   | AL158207.2 | 0.453024665  | 2.24E-20 | postive  |
| ITPR1   | AL158207.2 | 0.47654117   | 1.17E-22 | postive  |
| ATG16L2 | RAD51-AS1  | 0.551863295  | 2.84E-31 | postive  |
| GAPDH   | RAD51-AS1  | -0.402627685 | 4.78E-16 | negative |
| IKBKB   | RAD51-AS1  | 0.403729469  | 3.91E-16 | postive  |
| MAP1LC3 | LIX1L-AS1  | 0.544229829  | 2.68E-30 | postive  |
| BCL2    | AC079921.2 | 0.501817331  | 2.59E-25 | postive  |
| CFLAR   | AC079921.2 | 0.466554657  | 1.15E-21 | postive  |
| DLC1    | AC079921.2 | 0.480596376  | 4.55E-23 | postive  |
| HSPB8   | AC079921.2 | 0.495869297  | 1.15E-24 | postive  |
| ITPR1   | AC079921.2 | 0.559023031  | 3.28E-32 | postive  |
| ATG16L2 | AC092301.1 | 0.40648022   | 2.36E-16 | postive  |

|          |             |              |          |          |
|----------|-------------|--------------|----------|----------|
| ATG16L2  | AC026470.2  | 0.406651402  | 2.29E-16 | postive  |
| BIRC6    | AC026470.2  | 0.438719546  | 4.50E-19 | postive  |
| BCL2     | OSTN-AS1    | 0.441087075  | 2.77E-19 | postive  |
| CXCR4    | OSTN-AS1    | 0.561456919  | 1.56E-32 | postive  |
| MAP1LC3  | OSTN-AS1    | 0.6015129    | 2.86E-38 | postive  |
| BCL2     | AC015819.1  | 0.543551229  | 3.26E-30 | postive  |
| CCR2     | AC015819.1  | 0.45929455   | 5.75E-21 | postive  |
| CXCR4    | AC015819.1  | 0.584870485  | 8.64E-36 | postive  |
| DLC1     | LINC01579   | 0.46922115   | 6.29E-22 | postive  |
| GABARAP  | LINC01579   | 0.481154633  | 3.99E-23 | postive  |
| HSPB8    | LINC01579   | 0.622777593  | 1.17E-41 | postive  |
| TSC1     | AL160006.1  | 0.424050076  | 8.46E-18 | postive  |
| IFNG     | BANCR       | 0.411464364  | 9.38E-17 | postive  |
| ATG16L2  | AL450344.3  | 0.402185788  | 5.18E-16 | postive  |
| ATG16L2  | AL035448.1  | 0.406420519  | 2.39E-16 | postive  |
| ATG2B    | AL035448.1  | 0.429552039  | 2.86E-18 | postive  |
| EIF4EBP1 | AC087623.2  | 0.42251272   | 1.14E-17 | postive  |
| ATIC     | VPS9D1-AS1  | 0.407847218  | 1.84E-16 | postive  |
| BIRC5    | VPS9D1-AS1  | 0.424483615  | 7.77E-18 | postive  |
| USP10    | VPS9D1-AS1  | 0.416347705  | 3.73E-17 | postive  |
| DLC1     | LINC01638   | 0.457410296  | 8.67E-21 | postive  |
| MAP1LC3  | LINC01638   | 0.445250492  | 1.16E-19 | postive  |
| PEA15    | LINC01638   | 0.520395465  | 2.07E-27 | postive  |
| ATG16L2  | SEC62-AS1   | 0.522419249  | 1.20E-27 | postive  |
| BCL2     | SEC62-AS1   | 0.414269057  | 5.53E-17 | postive  |
| CFLAR    | SEC62-AS1   | 0.414843927  | 4.96E-17 | postive  |
| ATG16L2  | AC009120.2  | 0.5842862    | 1.05E-35 | postive  |
| CFLAR    | AC009120.2  | 0.467533889  | 9.21E-22 | postive  |
| IKBKB    | AC009120.2  | 0.411142972  | 9.96E-17 | postive  |
| P4HB     | AC009120.2  | -0.426075658 | 5.69E-18 | negative |
| DLC1     | SERTAD4-AS1 | 0.516865172  | 5.30E-27 | postive  |
| GABARAP  | SERTAD4-AS1 | 0.554369547  | 1.34E-31 | postive  |
| HDAC1    | SERTAD4-AS1 | -0.411411856 | 9.47E-17 | negative |
| HSPB8    | SERTAD4-AS1 | 0.770662513  | 5.42E-75 | postive  |
| ITPR1    | SERTAD4-AS1 | 0.440233364  | 3.30E-19 | postive  |
| NRG2     | SERTAD4-AS1 | 0.463380154  | 2.33E-21 | postive  |
| PEA15    | SERTAD4-AS1 | 0.468769554  | 6.97E-22 | postive  |
| ULK2     | SERTAD4-AS1 | 0.4149826    | 4.84E-17 | postive  |
| DIRAS3   | TP53TG1     | 0.410159813  | 1.20E-16 | postive  |
| GRID1    | TP53TG1     | 0.546390627  | 1.43E-30 | postive  |
| DLC1     | LINC00702   | 0.459840112  | 5.10E-21 | postive  |
| HSPB8    | LINC00702   | 0.685802168  | 2.02E-53 | postive  |
| ITGB1    | LINC00702   | 0.447139445  | 7.83E-20 | postive  |
| ITPR1    | LINC00702   | 0.409327401  | 1.40E-16 | postive  |

|         |            |              |           |          |
|---------|------------|--------------|-----------|----------|
| HSPA8   | AC002558.2 | -0.412566446 | 7.63E-17  | negative |
| ATG16L2 | AL928654.2 | 0.471171578  | 4.04E-22  | postive  |
| ATG2B   | AL928654.2 | 0.439137978  | 4.13E-19  | postive  |
| TSC1    | AL928654.2 | 0.462681089  | 2.72E-21  | postive  |
| DLC1    | AC079313.1 | 0.518609162  | 3.34E-27  | postive  |
| HSPB8   | AC079313.1 | 0.547652698  | 9.87E-31  | postive  |
| ITGB1   | AC079313.1 | 0.427942776  | 3.94E-18  | postive  |
| ITPR1   | AC079313.1 | 0.431425586  | 1.97E-18  | postive  |
| ATG16L2 | WAKMAR2    | 0.426302856  | 5.44E-18  | postive  |
| BCL2    | WAKMAR2    | 0.459974085  | 4.95E-21  | postive  |
| CFLAR   | WAKMAR2    | 0.493881082  | 1.87E-24  | postive  |
| CXCR4   | WAKMAR2    | 0.453925235  | 1.85E-20  | postive  |
| MAP1LC3 | WAKMAR2    | 0.404833716  | 3.20E-16  | postive  |
| DLC1    | AL513217.1 | 0.584871221  | 8.64E-36  | postive  |
| GABARAP | AL513217.1 | 0.421064831  | 1.51E-17  | postive  |
| HSPB8   | AL513217.1 | 0.873453528  | 1.24E-118 | postive  |
| ITPR1   | AL513217.1 | 0.572300593  | 5.21E-34  | postive  |
| NRG2    | AL513217.1 | 0.509822816  | 3.35E-26  | postive  |
| ULK2    | AL513217.1 | 0.512252731  | 1.78E-26  | postive  |
| NLRC4   | AC112721.2 | 0.422195423  | 1.21E-17  | postive  |
| HDAC6   | RNF157-AS1 | 0.405795935  | 2.68E-16  | postive  |
| ATG16L2 | AC005070.3 | 0.403973965  | 3.74E-16  | postive  |
| BCL2    | BNC2-AS1   | 0.406223867  | 2.48E-16  | postive  |
| DLC1    | BNC2-AS1   | 0.597872481  | 1.03E-37  | postive  |
| GABARAP | BNC2-AS1   | 0.504083262  | 1.46E-25  | postive  |
| HDAC1   | BNC2-AS1   | -0.413559464 | 6.33E-17  | negative |
| HSPB8   | BNC2-AS1   | 0.606481524  | 4.87E-39  | postive  |
| ITPR1   | BNC2-AS1   | 0.531926982  | 8.86E-29  | postive  |
| PEA15   | BNC2-AS1   | 0.50986431   | 3.32E-26  | postive  |
| PRKCD   | BNC2-AS1   | -0.407129201 | 2.10E-16  | negative |
| ULK2    | BNC2-AS1   | 0.431970421  | 1.77E-18  | postive  |
| ATG16L2 | AC092338.1 | 0.480436111  | 4.73E-23  | postive  |
| FAS     | AL157394.1 | 0.829148183  | 3.09E-96  | postive  |
| ATG16L2 | AC048341.1 | 0.433023181  | 1.43E-18  | postive  |
| RB1CC1  | AF117829.1 | 0.426233054  | 5.52E-18  | postive  |
| NPC1    | AC090912.3 | 0.466754198  | 1.10E-21  | postive  |
| ATG16L2 | AL355916.2 | 0.600459229  | 4.15E-38  | postive  |
| ATG2B   | AL355916.2 | 0.405566149  | 2.80E-16  | postive  |
| BCL2    | AL355916.2 | 0.545661672  | 1.77E-30  | postive  |
| BIRC6   | AL355916.2 | 0.411162167  | 9.92E-17  | postive  |
| CCR2    | AL355916.2 | 0.433801066  | 1.22E-18  | postive  |
| CFLAR   | AL355916.2 | 0.544416664  | 2.54E-30  | postive  |
| CXCR4   | AL355916.2 | 0.4791025    | 6.46E-23  | postive  |
| IKKBK   | AL355916.2 | 0.401171698  | 6.23E-16  | postive  |

|          |            |              |          |          |
|----------|------------|--------------|----------|----------|
| ITPR1    | AL355916.2 | 0.542409655  | 4.54E-30 | postive  |
| BIRC5    | LINC02575  | 0.426849562  | 4.89E-18 | postive  |
| P4HB     | AL356481.1 | -0.453051855 | 2.23E-20 | negative |
| ATG2B    | AL121772.3 | 0.421811471  | 1.31E-17 | postive  |
| ATG16L2  | AL606534.1 | 0.474925026  | 1.71E-22 | postive  |
| CASP4    | LINC02446  | 0.427242865  | 4.52E-18 | postive  |
| CX3CL1   | LINC02446  | 0.569524079  | 1.26E-33 | postive  |
| FAS      | LINC02446  | 0.441980635  | 2.30E-19 | postive  |
| IFNG     | LINC02446  | 0.834690738  | 1.15E-98 | postive  |
| TNFSF10  | LINC02446  | 0.493274506  | 2.17E-24 | postive  |
| ATG16L2  | LINC01781  | 0.48485529   | 1.66E-23 | postive  |
| BCL2     | LINC01781  | 0.656564941  | 1.30E-47 | postive  |
| CXCR4    | LINC01781  | 0.636010705  | 6.68E-44 | postive  |
| ITPR1    | LINC01781  | 0.446159865  | 9.62E-20 | postive  |
| FADD     | AL354766.2 | 0.44172753   | 2.42E-19 | postive  |
| MAP2K7   | AL354766.2 | 0.576281425  | 1.45E-34 | postive  |
| MAPK8IP1 | AL354766.2 | 0.670342377  | 2.88E-50 | postive  |
| PEX3     | AL354766.2 | 0.60942436   | 1.68E-39 | postive  |
| TP73     | AL354766.2 | 0.409203969  | 1.43E-16 | postive  |
| ATG4B    | CAPN10-DT  | 0.576710036  | 1.26E-34 | postive  |
| CAPN10   | CAPN10-DT  | 0.606567354  | 4.73E-39 | postive  |
| CTSB     | AC069185.1 | 0.789198508  | 5.51E-81 | postive  |
| ATG16L2  | AC015971.1 | 0.488719455  | 6.57E-24 | postive  |
| ATG2B    | AC015971.1 | 0.496044767  | 1.10E-24 | postive  |
| BIRC6    | AC015971.1 | 0.569733357  | 1.18E-33 | postive  |
| CFLAR    | AC015971.1 | 0.421958665  | 1.27E-17 | postive  |
| TSC1     | AC015971.1 | 0.413390518  | 6.53E-17 | postive  |
| ATG16L2  | AC009120.3 | 0.581065907  | 3.05E-35 | postive  |
| CFLAR    | AC009120.3 | 0.485351392  | 1.48E-23 | postive  |
| GAPDH    | AC009120.3 | -0.406952357 | 2.17E-16 | negative |
| IKBKB    | AC009120.3 | 0.433612225  | 1.27E-18 | postive  |
| TSC2     | AC009120.3 | 0.422190768  | 1.21E-17 | postive  |
| TP63     | AC010735.2 | 0.403321744  | 4.21E-16 | postive  |
| EEF2     | SNHG29     | 0.510278032  | 2.98E-26 | postive  |
| ATG16L2  | AC004067.1 | 0.498164808  | 6.48E-25 | postive  |
| ATG16L2  | AL137779.1 | 0.493151648  | 2.24E-24 | postive  |
| BCL2     | AL137779.1 | 0.487991437  | 7.83E-24 | postive  |
| CFLAR    | AL137779.1 | 0.416325618  | 3.75E-17 | postive  |
| CXCR4    | AL137779.1 | 0.553795639  | 1.60E-31 | postive  |
| MAP1LC3  | AL137779.1 | 0.472958064  | 2.68E-22 | postive  |
| TSC1     | AP000442.1 | 0.45079754   | 3.61E-20 | postive  |
| ATG16L2  | AC055855.1 | 0.525083559  | 5.83E-28 | postive  |
| MAP1LC3  | HID1-AS1   | 0.476631324  | 1.15E-22 | postive  |
| BCL2     | AC009126.1 | 0.427117248  | 4.64E-18 | postive  |

|          |            |              |          |          |
|----------|------------|--------------|----------|----------|
| HSPB8    | AC009126.1 | 0.463238772  | 2.41E-21 | postive  |
| NRG2     | AC009126.1 | 0.420793707  | 1.59E-17 | postive  |
| ATG16L2  | AC005785.1 | 0.482774054  | 2.72E-23 | postive  |
| ATG16L2  | AL450998.2 | 0.613198059  | 4.23E-40 | postive  |
| ATG2B    | AL450998.2 | 0.448134497  | 6.35E-20 | postive  |
| CFLAR    | AL450998.2 | 0.421064118  | 1.51E-17 | postive  |
| IKBKB    | AL450998.2 | 0.4431239    | 1.81E-19 | postive  |
| TSC1     | AL450998.2 | 0.484152449  | 1.96E-23 | postive  |
| EIF4G1   | AC135507.1 | -0.472784877 | 2.79E-22 | negative |
| DDIT3    | LINCR-0001 | 0.481373401  | 3.79E-23 | postive  |
| MLST8    | NRAV       | 0.416188772  | 3.85E-17 | postive  |
| HSPB8    | GACAT2     | 0.412769169  | 7.34E-17 | postive  |
| MAPK8IP1 | AC013652.1 | 0.403979419  | 3.74E-16 | postive  |
| MAP1LC3  | AC135050.3 | 0.437959465  | 5.26E-19 | postive  |
| HSPA8    | AC006141.1 | -0.417199856 | 3.17E-17 | negative |
| ATG16L2  | AP001107.4 | 0.45587319   | 1.21E-20 | postive  |
| PEA15    | AC093484.4 | -0.42054526  | 1.67E-17 | negative |
| ATG16L2  | AL513190.1 | 0.445106747  | 1.20E-19 | postive  |
| HSPB8    | AP001065.3 | 0.537778216  | 1.71E-29 | postive  |
| ATF6     | AL162595.1 | 0.402072127  | 5.29E-16 | postive  |
| ATG16L2  | RNF213-AS1 | 0.486783548  | 1.05E-23 | postive  |
| CFLAR    | RNF213-AS1 | 0.437722696  | 5.52E-19 | postive  |
| IKBKB    | RNF213-AS1 | 0.400908358  | 6.53E-16 | postive  |
| BCL2     | AL596244.1 | 0.408662832  | 1.58E-16 | postive  |
| DLC1     | AL596244.1 | 0.565907236  | 3.92E-33 | postive  |
| HSPB8    | AL596244.1 | 0.712996181  | 1.79E-59 | postive  |
| ITPR1    | AL596244.1 | 0.557093606  | 5.90E-32 | postive  |
| NRG2     | AL596244.1 | 0.414291085  | 5.51E-17 | postive  |
| ULK2     | AL596244.1 | 0.485846489  | 1.31E-23 | postive  |
| RB1CC1   | AC090186.1 | 0.426522353  | 5.21E-18 | postive  |
| ATG16L2  | AC068790.4 | 0.436798466  | 6.67E-19 | postive  |
| ITGA3    | AC245041.2 | 0.467738084  | 8.79E-22 | postive  |
| PINK1    | AL390728.5 | -0.45680707  | 9.89E-21 | negative |
| WIPI2    | AC092171.5 | 0.451065831  | 3.41E-20 | postive  |
| ATG16L2  | LINC00894  | 0.462493743  | 2.84E-21 | postive  |
| BAK1     | GNG12-AS1  | -0.423208193 | 9.97E-18 | negative |
| BIRC5    | GNG12-AS1  | -0.403951325 | 3.76E-16 | negative |
| DLC1     | GNG12-AS1  | 0.585705063  | 6.54E-36 | postive  |
| HSPB8    | GNG12-AS1  | 0.638464207  | 2.49E-44 | postive  |
| ITPR1    | GNG12-AS1  | 0.541064186  | 6.68E-30 | postive  |
| P4HB     | GNG12-AS1  | -0.401105833 | 6.30E-16 | negative |
| ULK2     | GNG12-AS1  | 0.510970005  | 2.49E-26 | postive  |
| MAP1LC3  | AC027575.2 | 0.414321968  | 5.48E-17 | postive  |
| RAC1     | AC015912.3 | 0.434965931  | 9.67E-19 | postive  |

|          |            |              |          |          |
|----------|------------|--------------|----------|----------|
| CX3CL1   | AL139352.1 | 0.467524599  | 9.23E-22 | postive  |
| IFNG     | AL139352.1 | 0.420518595  | 1.68E-17 | postive  |
| MAP1LC3  | AC005332.1 | 0.440932022  | 2.86E-19 | postive  |
| BAX      | AC027307.2 | 0.424480127  | 7.78E-18 | postive  |
| RAB24    | FOXO6-AS1  | 0.468645356  | 7.16E-22 | postive  |
| BCL2     | ZNF582-AS1 | 0.466210883  | 1.24E-21 | postive  |
| CXCR4    | ZNF582-AS1 | 0.441507816  | 2.54E-19 | postive  |
| DLC1     | ZNF582-AS1 | 0.488506759  | 6.92E-24 | postive  |
| GABARAP  | ZNF582-AS1 | 0.463732389  | 2.16E-21 | postive  |
| HSPB8    | ZNF582-AS1 | 0.588678346  | 2.41E-36 | postive  |
| ITPR1    | ZNF582-AS1 | 0.574077409  | 2.95E-34 | postive  |
| MAP1LC3  | ZNF582-AS1 | 0.41004549   | 1.22E-16 | postive  |
| NRG2     | ZNF582-AS1 | 0.45027709   | 4.03E-20 | postive  |
| PEA15    | ZNF582-AS1 | 0.452854147  | 2.32E-20 | postive  |
| ATG16L2  | AL512791.1 | 0.451639064  | 3.01E-20 | postive  |
| ATG2B    | AL512791.1 | 0.443687066  | 1.61E-19 | postive  |
| MLST8    | AL512791.1 | -0.405647124 | 2.76E-16 | negative |
| ATG16L2  | YEATS2-AS1 | 0.514598875  | 9.65E-27 | postive  |
| ATG2B    | YEATS2-AS1 | 0.424927196  | 7.13E-18 | postive  |
| IKBKB    | YEATS2-AS1 | 0.444901057  | 1.25E-19 | postive  |
| KLHL24   | YEATS2-AS1 | 0.444353183  | 1.40E-19 | postive  |
| RPS6KB1  | YEATS2-AS1 | 0.427756223  | 4.09E-18 | postive  |
| TSC1     | YEATS2-AS1 | 0.47608433   | 1.31E-22 | postive  |
| ATG16L2  | AC008770.3 | 0.476389651  | 1.22E-22 | postive  |
| BCL2     | AC008770.3 | 0.423891354  | 8.73E-18 | postive  |
| CFLAR    | AC008770.3 | 0.449832411  | 4.43E-20 | postive  |
| GABARAP  | AC008669.1 | 0.408395052  | 1.66E-16 | postive  |
| NRG2     | AC008669.1 | 0.439743137  | 3.65E-19 | postive  |
| BCL2     | AC104971.3 | 0.52518134   | 5.68E-28 | postive  |
| CXCR4    | AC104971.3 | 0.651118821  | 1.34E-46 | postive  |
| MAP1LC3  | AC104971.3 | 0.512347829  | 1.74E-26 | postive  |
| ATG16L2  | AC114730.3 | 0.484818638  | 1.68E-23 | postive  |
| ATG4B    | AC114730.3 | 0.448512558  | 5.86E-20 | postive  |
| IKBKB    | AC114730.3 | 0.440034677  | 3.44E-19 | postive  |
| TSC1     | AC114730.3 | 0.415970799  | 4.01E-17 | postive  |
| GOPC     | AL161891.1 | 0.435864323  | 8.06E-19 | postive  |
| MAPK8IP1 | AL161891.1 | 0.41537806   | 4.49E-17 | postive  |
| PEX3     | AL161891.1 | 0.411100758  | 1.00E-16 | postive  |
| ATG16L2  | LINC01126  | 0.449161122  | 5.11E-20 | postive  |
| BIRC6    | LINC01126  | 0.416208597  | 3.83E-17 | postive  |
| ATG16L2  | AL355488.1 | 0.425637128  | 6.20E-18 | postive  |
| GOPC     | AL355488.1 | 0.405728247  | 2.71E-16 | postive  |
| CDKN2A   | AL606970.1 | 0.421762457  | 1.32E-17 | postive  |
| MAPK8IP1 | AL606970.1 | 0.448676726  | 5.66E-20 | postive  |

|          |            |              |          |          |
|----------|------------|--------------|----------|----------|
| ATG16L2  | LIMS1-AS1  | 0.489887671  | 4.95E-24 | postive  |
| ATG2B    | LIMS1-AS1  | 0.414089288  | 5.72E-17 | postive  |
| CFLAR    | LIMS1-AS1  | 0.414835656  | 4.97E-17 | postive  |
| MAP1LC3  | LIMS1-AS1  | 0.451276003  | 3.26E-20 | postive  |
| NLRC4    | LIMS1-AS1  | 0.421610761  | 1.36E-17 | postive  |
| PARP1    | SERPINB9P1 | 0.490743288  | 4.02E-24 | postive  |
| RGS19    | SERPINB9P1 | 0.726480398  | 9.61E-63 | postive  |
| RAB24    | UICLM      | 0.444697586  | 1.31E-19 | postive  |
| ATG16L2  | AC127024.6 | 0.428876989  | 3.27E-18 | postive  |
| ATG16L2  | AL133243.3 | 0.442585257  | 2.03E-19 | postive  |
| GAPDH    | AL133243.3 | -0.410360944 | 1.15E-16 | negative |
| P4HB     | AL133243.3 | -0.41869774  | 2.38E-17 | negative |
| ATG16L2  | AP005131.4 | 0.531416099  | 1.02E-28 | postive  |
| BCL2     | AP005131.4 | 0.556406902  | 7.27E-32 | postive  |
| ITPR1    | AP005131.4 | 0.507395968  | 6.27E-26 | postive  |
| TSC2     | AP005131.4 | 0.436367406  | 7.28E-19 | postive  |
| ATG16L2  | AP001893.1 | 0.501191331  | 3.04E-25 | postive  |
| TSC1     | AP001893.1 | 0.436405958  | 7.22E-19 | postive  |
| ATG16L2  | AL138787.2 | 0.487228616  | 9.41E-24 | postive  |
| BIRC5    | UBAC2-AS1  | 0.416389285  | 3.70E-17 | postive  |
| ATG16L2  | CCDC18-AS1 | 0.617964098  | 7.21E-41 | postive  |
| ATG16L2  | AL049840.5 | 0.510302663  | 2.96E-26 | postive  |
| ATG2B    | AL049840.5 | 0.502063805  | 2.44E-25 | postive  |
| IKBKB    | AL049840.5 | 0.407101006  | 2.11E-16 | postive  |
| TSC1     | AL049840.5 | 0.447150911  | 7.81E-20 | postive  |
| BCL2     | AC007569.1 | 0.417251074  | 3.14E-17 | postive  |
| CCR2     | AC007569.1 | 0.568395499  | 1.80E-33 | postive  |
| CFLAR    | AC007569.1 | 0.451995025  | 2.79E-20 | postive  |
| CXCR4    | AC007569.1 | 0.564333333  | 6.40E-33 | postive  |
| NLRC4    | AC007569.1 | 0.410072113  | 1.22E-16 | postive  |
| BIRC5    | AC004943.2 | 0.429665193  | 2.80E-18 | postive  |
| USP10    | AC004943.2 | 0.42824702   | 3.71E-18 | postive  |
| RAB24    | KCNQ1OT1   | 0.415145487  | 4.69E-17 | postive  |
| MAPK8IP1 | AC004034.1 | 0.423160791  | 1.01E-17 | postive  |
| GAPDH    | AC019205.1 | -0.41354525  | 6.34E-17 | negative |
| UVRAG    | AC019205.1 | 0.437261134  | 6.07E-19 | postive  |
| ATG16L2  | AL162586.1 | 0.438166624  | 5.04E-19 | postive  |
| GAPDH    | AL162586.1 | -0.41640721  | 3.69E-17 | negative |
| TSC1     | AL162586.1 | 0.457992007  | 7.64E-21 | postive  |
| SPNS1    | AP001527.2 | 0.412166549  | 8.22E-17 | postive  |
| ARSB     | MAGI2-AS3  | 0.589876318  | 1.61E-36 | postive  |
| ATG4D    | MAGI2-AS3  | -0.406492381 | 2.36E-16 | negative |
| ATIC     | MAGI2-AS3  | -0.492862711 | 2.40E-24 | negative |
| BAK1     | MAGI2-AS3  | -0.402390431 | 4.99E-16 | negative |



|         |            |              |          |          |
|---------|------------|--------------|----------|----------|
| BCL2    | MAGI2-AS3  | 0.524162064  | 7.49E-28 | postive  |
| BIRC5   | MAGI2-AS3  | -0.514375098 | 1.02E-26 | negative |
| DLC1    | MAGI2-AS3  | 0.818732969  | 6.69E-92 | postive  |
| GABARAP | MAGI2-AS3  | 0.573564903  | 3.48E-34 | postive  |
| HDAC1   | MAGI2-AS3  | -0.495069901 | 1.40E-24 | negative |
| HSPA5   | MAGI2-AS3  | -0.412154846 | 8.24E-17 | negative |
| HSPB8   | MAGI2-AS3  | 0.669156944  | 4.94E-50 | postive  |
| ITGB1   | MAGI2-AS3  | 0.498463418  | 6.01E-25 | postive  |
| ITPR1   | MAGI2-AS3  | 0.753378145  | 6.83E-70 | postive  |
| NRG2    | MAGI2-AS3  | 0.416570027  | 3.58E-17 | postive  |
| P4HB    | MAGI2-AS3  | -0.406528708 | 2.34E-16 | negative |
| PEA15   | MAGI2-AS3  | 0.524485095  | 6.87E-28 | postive  |
| ULK2    | MAGI2-AS3  | 0.577532522  | 9.67E-35 | postive  |
| ZFYVE1  | MAGI2-AS3  | 0.464409442  | 1.85E-21 | postive  |
| GRID1   | AC100803.3 | 0.418586664  | 2.43E-17 | postive  |
| TSC1    | AL513327.2 | 0.451096572  | 3.38E-20 | postive  |
| BCL2    | AL158212.3 | 0.423227241  | 9.93E-18 | postive  |
| ITPR1   | AL158212.3 | 0.474572505  | 1.85E-22 | postive  |
| TSC1    | AL158212.3 | 0.41427822   | 5.52E-17 | postive  |
| ATG16L2 | AC084018.1 | 0.582210054  | 2.09E-35 | postive  |
| BCL2    | AC084018.1 | 0.425740163  | 6.08E-18 | postive  |
| CFLAR   | AC084018.1 | 0.424417072  | 7.88E-18 | postive  |
| IKBKB   | AC084018.1 | 0.407188293  | 2.08E-16 | postive  |
| TSC1    | AC084018.1 | 0.468714766  | 7.05E-22 | postive  |
| CDKN2A  | AC080129.2 | 0.429268874  | 3.03E-18 | postive  |
| ATG16L2 | ECE1-AS1   | 0.553199069  | 1.91E-31 | postive  |
| BCL2    | ECE1-AS1   | 0.598068422  | 9.59E-38 | postive  |
| CFLAR   | ECE1-AS1   | 0.403494517  | 4.08E-16 | postive  |
| CXCR4   | ECE1-AS1   | 0.50569475   | 9.70E-26 | postive  |
| ITPR1   | ECE1-AS1   | 0.467833293  | 8.61E-22 | postive  |
| MAP1LC3 | ECE1-AS1   | 0.43566259   | 8.40E-19 | postive  |
| ATG16L2 | AC007216.4 | 0.406497365  | 2.36E-16 | postive  |
| ATG16L2 | AL359921.1 | 0.429323252  | 3.00E-18 | postive  |
| MAP1LC3 | AC136469.1 | 0.491412125  | 3.42E-24 | postive  |
| ATG16L2 | AP000692.1 | 0.456236066  | 1.12E-20 | postive  |
| ATG16L2 | AC138028.4 | 0.440985389  | 2.83E-19 | postive  |
| TSC1    | AC138028.4 | 0.429263362  | 3.03E-18 | postive  |
| ATG16L2 | IGBP1-AS1  | 0.438815304  | 4.42E-19 | postive  |
| PEX14   | AC096536.2 | 0.405747264  | 2.71E-16 | postive  |
| ATG16L2 | RERE-AS1   | 0.480725918  | 4.42E-23 | postive  |
| ATG7    | FGD5-AS1   | 0.440326187  | 3.24E-19 | postive  |
| NCKAP1  | FGD5-AS1   | 0.498360228  | 6.17E-25 | postive  |
| PIK3C3  | FGD5-AS1   | 0.411136916  | 9.97E-17 | postive  |
| RAF1    | FGD5-AS1   | 0.637257851  | 4.05E-44 | postive  |

|          |            |              |          |          |
|----------|------------|--------------|----------|----------|
| MAPK8IP1 | AC002401.3 | 0.413789255  | 6.06E-17 | postive  |
| ATG16L2  | AC007686.3 | 0.455933652  | 1.20E-20 | postive  |
| BCL2     | AC007686.3 | 0.501702029  | 2.67E-25 | postive  |
| ITPR1    | AC007686.3 | 0.443976886  | 1.52E-19 | postive  |
| MAP1LC3  | AC007686.3 | 0.409730291  | 1.30E-16 | postive  |
| ATG16L2  | AL590609.2 | 0.426292494  | 5.45E-18 | postive  |
| BCL2     | AL590609.2 | 0.529477476  | 1.75E-28 | postive  |
| CXCR4    | AL590609.2 | 0.494951753  | 1.44E-24 | postive  |
| SPHK1    | C10orf55   | 0.482497539  | 2.91E-23 | postive  |
| ATG16L2  | LINC00426  | 0.503953932  | 1.51E-25 | postive  |
| BCL2     | LINC00426  | 0.680996208  | 2.03E-52 | postive  |
| CCR2     | LINC00426  | 0.464649869  | 1.76E-21 | postive  |
| CFLAR    | LINC00426  | 0.486945678  | 1.01E-23 | postive  |
| CXCR4    | LINC00426  | 0.60309429   | 1.63E-38 | postive  |
| ITPR1    | LINC00426  | 0.462405244  | 2.89E-21 | postive  |
| MAP1LC3  | LINC00426  | 0.535607163  | 3.16E-29 | postive  |
| NLRC4    | LINC00426  | 0.404464319  | 3.42E-16 | postive  |
| RGS19    | LINC00426  | 0.435686483  | 8.36E-19 | postive  |
| BECN1    | AC103769.1 | -0.400522717 | 7.00E-16 | negative |
| MAPK3    | AC020663.2 | 0.507228985  | 6.55E-26 | postive  |
| TP63     | AL031058.1 | 0.411508046  | 9.30E-17 | postive  |
| TP63     | LINC02560  | 0.56353275   | 8.21E-33 | postive  |
| BCL2     | AC008537.2 | 0.400945335  | 6.48E-16 | postive  |
| CFLAR    | AC008537.2 | 0.41204059   | 8.42E-17 | postive  |
| ITPR1    | AC008537.2 | 0.460843647  | 4.09E-21 | postive  |
| BIRC6    | DNMBP-AS1  | 0.429283917  | 3.02E-18 | postive  |
| ARSB     | FENDRR     | 0.471870338  | 3.44E-22 | postive  |
| ATIC     | FENDRR     | -0.43094562  | 2.17E-18 | negative |
| BCL2     | FENDRR     | 0.419338482  | 2.11E-17 | postive  |
| BIRC5    | FENDRR     | -0.411824841 | 8.76E-17 | negative |
| DLC1     | FENDRR     | 0.755421487  | 1.79E-70 | postive  |
| GABARAP  | FENDRR     | 0.504215611  | 1.41E-25 | postive  |
| HDAC1    | FENDRR     | -0.443601731 | 1.64E-19 | negative |
| HSPB8    | FENDRR     | 0.829674048  | 1.83E-96 | postive  |
| ITGB1    | FENDRR     | 0.449674849  | 4.58E-20 | postive  |
| ITPR1    | FENDRR     | 0.708340277  | 2.18E-58 | postive  |
| NRG2     | FENDRR     | 0.454671451  | 1.57E-20 | postive  |
| PEA15    | FENDRR     | 0.43561023   | 8.49E-19 | postive  |
| TP53INP2 | FENDRR     | 0.432906261  | 1.46E-18 | postive  |
| ULK2     | FENDRR     | 0.52344612   | 9.10E-28 | postive  |
| ZFYVE1   | FENDRR     | 0.426136535  | 5.62E-18 | postive  |
| ULK2     | TMEM9B-AS1 | 0.429532928  | 2.87E-18 | postive  |
| BCL2     | TPM1-AS    | 0.403326595  | 4.21E-16 | postive  |
| DLC1     | TPM1-AS    | 0.504983693  | 1.16E-25 | postive  |

|          |             |              |          |          |
|----------|-------------|--------------|----------|----------|
| HSPB8    | TPM1-AS     | 0.573555832  | 3.49E-34 | postive  |
| ITPR1    | TPM1-AS     | 0.496194284  | 1.06E-24 | postive  |
| ATG16L2  | AC066613.1  | 0.475223283  | 1.59E-22 | postive  |
| ATG2B    | AC066613.1  | 0.421248972  | 1.46E-17 | postive  |
| SERPINA1 | LINC01767   | 0.435359616  | 8.93E-19 | postive  |
| TSC1     | SPAG5-AS1   | 0.424537829  | 7.69E-18 | postive  |
| MAP1LC3  | AL138895.1  | 0.427559283  | 4.25E-18 | postive  |
| ATG16L2  | ALOX12-AS1  | 0.413786458  | 6.06E-17 | postive  |
| CCR2     | AC083862.1  | 0.433790643  | 1.23E-18 | postive  |
| CFLAR    | AC083862.1  | 0.50824379   | 5.04E-26 | postive  |
| CX3CL1   | AC083862.1  | 0.444517969  | 1.36E-19 | postive  |
| TNFSF10  | AC083862.1  | 0.4723221    | 3.10E-22 | postive  |
| RHEB     | AC005229.3  | 0.404299427  | 3.53E-16 | postive  |
| CAPN10   | AC074117.1  | 0.439712023  | 3.67E-19 | postive  |
| HDAC6    | AC074117.1  | 0.418722463  | 2.37E-17 | postive  |
| BAG1     | B4GALT1-AS1 | 0.486749399  | 1.06E-23 | postive  |
| ARSB     | A1BG-AS1    | 0.402685038  | 4.73E-16 | postive  |
| BCL2     | A1BG-AS1    | 0.446647835  | 8.68E-20 | postive  |
| CXCR4    | A1BG-AS1    | 0.452694404  | 2.40E-20 | postive  |
| ITPR1    | A1BG-AS1    | 0.412879171  | 7.19E-17 | postive  |
| RGS19    | A1BG-AS1    | 0.466569306  | 1.14E-21 | postive  |
| GRID1    | H1-10-AS1   | 0.433880338  | 1.20E-18 | postive  |
| MAPK8IP1 | H1-10-AS1   | 0.630818574  | 5.22E-43 | postive  |
| ATG3     | AC083799.1  | 0.400272315  | 7.32E-16 | postive  |
| RAB7A    | AC083799.1  | 0.43163863   | 1.89E-18 | postive  |
| ARSB     | ADAMTS9-AS2 | 0.414505633  | 5.29E-17 | postive  |
| ATIC     | ADAMTS9-AS2 | -0.410076982 | 1.21E-16 | negative |
| BCL2     | ADAMTS9-AS2 | 0.495895986  | 1.14E-24 | postive  |
| BIRC5    | ADAMTS9-AS2 | -0.430916459 | 2.18E-18 | negative |
| DLC1     | ADAMTS9-AS2 | 0.67144442   | 1.74E-50 | postive  |
| GABARAP  | ADAMTS9-AS2 | 0.464746499  | 1.72E-21 | postive  |
| HDAC1    | ADAMTS9-AS2 | -0.422684216 | 1.10E-17 | negative |
| HSPA5    | ADAMTS9-AS2 | -0.445826502 | 1.03E-19 | negative |
| HSPB8    | ADAMTS9-AS2 | 0.811802679  | 3.62E-89 | postive  |
| ITPR1    | ADAMTS9-AS2 | 0.696888089  | 8.33E-56 | postive  |
| NRG2     | ADAMTS9-AS2 | 0.50932445   | 3.82E-26 | postive  |
| P4HB     | ADAMTS9-AS2 | -0.405407594 | 2.88E-16 | negative |
| PEA15    | ADAMTS9-AS2 | 0.431766348  | 1.84E-18 | postive  |
| ULK2     | ADAMTS9-AS2 | 0.539195303  | 1.14E-29 | postive  |
| EIF4G1   | AC114980.1  | -0.441899855 | 2.34E-19 | negative |
| P4HB     | AC114980.1  | -0.447367435 | 7.46E-20 | negative |
| ATG16L2  | AC008737.1  | 0.43903563   | 4.22E-19 | postive  |
| ATG16L2  | AL133406.2  | 0.4452436    | 1.17E-19 | postive  |
| ATG2B    | AL133406.2  | 0.432260206  | 1.67E-18 | postive  |

|          |            |              |          |          |
|----------|------------|--------------|----------|----------|
| FOXO3    | AL133406.2 | 0.419763553  | 1.94E-17 | postive  |
| DLC1     | AC053503.3 | 0.631188519  | 4.52E-43 | postive  |
| GABARAP  | AC053503.3 | 0.417140883  | 3.21E-17 | postive  |
| HSPB8    | AC053503.3 | 0.782288531  | 1.11E-78 | postive  |
| ITGB1    | AC053503.3 | 0.458477871  | 6.87E-21 | postive  |
| ITPR1    | AC053503.3 | 0.55921511   | 3.10E-32 | postive  |
| NRG2     | AC053503.3 | 0.400156422  | 7.48E-16 | postive  |
| ULK2     | AC053503.3 | 0.498712596  | 5.65E-25 | postive  |
| PARP1    | AC008074.2 | 0.458331641  | 7.09E-21 | postive  |
| RGS19    | AC008074.2 | 0.592857803  | 5.81E-37 | postive  |
| CAPN10   | ADNP-AS1   | 0.414114027  | 5.70E-17 | postive  |
| BAK1     | AL122035.2 | -0.448252498 | 6.19E-20 | negative |
| BCL2     | AL122035.2 | 0.461799563  | 3.31E-21 | postive  |
| DLC1     | AL122035.2 | 0.506725998  | 7.45E-26 | postive  |
| GAPDH    | AL122035.2 | -0.401679749 | 5.68E-16 | negative |
| HSPB8    | AL122035.2 | 0.501091554  | 3.11E-25 | postive  |
| ITPR1    | AL122035.2 | 0.57499064   | 2.20E-34 | postive  |
| P4HB     | AL122035.2 | -0.497499041 | 7.65E-25 | negative |
| ULK2     | AL122035.2 | 0.443451534  | 1.69E-19 | postive  |
| MAP1LC3  | AC002094.4 | 0.402363833  | 5.02E-16 | postive  |
| DLC1     | AC083964.1 | 0.40653934   | 2.34E-16 | postive  |
| GABARAP  | AC083964.1 | 0.518671861  | 3.28E-27 | postive  |
| HSPB8    | AC083964.1 | 0.44049002   | 3.13E-19 | postive  |
| TBK1     | AC025165.4 | 0.462712313  | 2.70E-21 | postive  |
| BCL2     | AC093278.2 | 0.44293048   | 1.89E-19 | postive  |
| CCR2     | AC093278.2 | 0.464111588  | 1.98E-21 | postive  |
| CFLAR    | AC093278.2 | 0.472812832  | 2.77E-22 | postive  |
| DLC1     | AC093278.2 | 0.494977662  | 1.43E-24 | postive  |
| ITPR1    | AC093278.2 | 0.593291148  | 5.01E-37 | postive  |
| ATG2B    | AC098484.1 | 0.402824228  | 4.61E-16 | postive  |
| BCL2     | AC098484.1 | 0.532355926  | 7.86E-29 | postive  |
| ITPR1    | AC098484.1 | 0.55562747   | 9.20E-32 | postive  |
| TSC2     | AC098484.1 | 0.406692668  | 2.27E-16 | postive  |
| RGS19    | AP000345.2 | 0.408838382  | 1.53E-16 | postive  |
| GRID1    | AC007541.1 | 0.405679564  | 2.74E-16 | postive  |
| MAPK8IP1 | AC007541.1 | 0.464163825  | 1.96E-21 | postive  |
| PARP1    | AL133467.1 | 0.62195214   | 1.60E-41 | postive  |
| RGS19    | AL133467.1 | 0.797503324  | 7.18E-84 | postive  |
| BAX      | LINC02381  | 0.40357559   | 4.02E-16 | postive  |
| ATG16L2  | LRRC8C-DT  | 0.415915122  | 4.05E-17 | postive  |
| BCL2     | LRRC8C-DT  | 0.685399035  | 2.46E-53 | postive  |
| CCR2     | LRRC8C-DT  | 0.402956572  | 4.50E-16 | postive  |
| CFLAR    | LRRC8C-DT  | 0.41884101   | 2.32E-17 | postive  |
| CXCR4    | LRRC8C-DT  | 0.55364879   | 1.67E-31 | postive  |

|          |            |             |          |         |
|----------|------------|-------------|----------|---------|
| ITPR1    | LRRC8C-DT  | 0.626171328 | 3.19E-42 | postive |
| MAP1LC3  | LRRC8C-DT  | 0.411370611 | 9.54E-17 | postive |
| ATG16L2  | FAM13A-AS1 | 0.639488537 | 1.65E-44 | postive |
| CFLAR    | FAM13A-AS1 | 0.45650947  | 1.06E-20 | postive |
| IKBKB    | FAM13A-AS1 | 0.465648042 | 1.41E-21 | postive |
| DDIT3    | AC025165.5 | 0.425354018 | 6.56E-18 | postive |
| RAB5A    | AC112220.2 | 0.418494958 | 2.48E-17 | postive |
| FADD     | AL606489.1 | 0.420274812 | 1.76E-17 | postive |
| SPNS1    | AL606489.1 | 0.418976512 | 2.26E-17 | postive |
| ATG16L2  | AC084824.3 | 0.578643834 | 6.73E-35 | postive |
| BCL2     | AC084824.3 | 0.445440491 | 1.12E-19 | postive |
| CFLAR    | AC084824.3 | 0.400650748 | 6.84E-16 | postive |
| HSP90AB1 | C6orf223   | 0.535942566 | 2.87E-29 | postive |
| VEGFA    | C6orf223   | 0.53463584  | 4.15E-29 | postive |
| ATG16L2  | ZBTB40-IT1 | 0.513376211 | 1.33E-26 | postive |
| ATG2B    | ZBTB40-IT1 | 0.442933388 | 1.89E-19 | postive |
| TSC1     | ZBTB40-IT1 | 0.4720073   | 3.34E-22 | postive |
| ATG16L2  | AC016957.2 | 0.431111191 | 2.10E-18 | postive |
| BCL2     | AC016957.2 | 0.407614431 | 1.92E-16 | postive |
| GRID1    | LINC01376  | 0.438188106 | 5.02E-19 | postive |
| ATG16L2  | SEMA6A-AS1 | 0.414796609 | 5.01E-17 | postive |
| ATG2B    | SEMA6A-AS1 | 0.429204593 | 3.07E-18 | postive |
| GOPC     | SEMA6A-AS1 | 0.415063471 | 4.76E-17 | postive |
| PIK3C3   | SEMA6A-AS1 | 0.412206308 | 8.16E-17 | postive |
| GRID1    | AC104072.1 | 0.497586237 | 7.48E-25 | postive |

**Table S3:** The difference of Stromal Score, Immune Score, microenvironment score and relative infiltration abundance of immune cells of the two risk groups were estimated based on the 7 algorithms such as TIMER, CIBERSORT, CIBERSORE-ABS, QUANTISEQ, MCPCOUNTER, XCELL and EPIC.

| immune                                       | pvalue   |
|----------------------------------------------|----------|
| B cell_TIMER                                 | 0.002399 |
| T cell CD4+_TIMER                            | 9.62E-08 |
| T cell CD8+_TIMER                            | 2.39E-05 |
| Neutrophil_TIMER                             | 7.99E-11 |
| Macrophage_TIMER                             | 1.58E-13 |
| Myeloid dendritic cell_TIMER                 | 5.36E-10 |
| B cell memory_CIBERSORT                      | 0.008762 |
| T cell follicular helper_CIBERSORT           | 0.03245  |
| Monocyte_CIBERSORT                           | 0.023569 |
| Macrophage M0_CIBERSORT                      | 0.011514 |
| Macrophage M2_CIBERSORT                      | 0.013284 |
| Myeloid dendritic cell resting_CIBERSORT     | 0.008971 |
| Mast cell activated_CIBERSORT                | 0.001606 |
| Mast cell resting_CIBERSORT                  | 0.004879 |
| B cell memory_CIBERSORT-ABS                  | 0.002154 |
| T cell CD8+_CIBERSORT-ABS                    | 1.31E-05 |
| T cell CD4+ memory resting_CIBERSORT-ABS     | 1.46E-07 |
| T cell regulatory (Tregs)_CIBERSORT-ABS      | 0.001729 |
| NK cell activated_CIBERSORT-ABS              | 0.006716 |
| Monocyte_CIBERSORT-ABS                       | 2.20E-05 |
| Macrophage M1_CIBERSORT-ABS                  | 0.000112 |
| Macrophage M2_CIBERSORT-ABS                  | 5.48E-12 |
| Myeloid dendritic cell resting_CIBERSORT-ABS | 0.002463 |
| Mast cell activated_CIBERSORT-ABS            | 6.74E-05 |
| B cell_QUANTISEQ                             | 6.89E-05 |
| Macrophage M2_QUANTISEQ                      | 1.17E-08 |
| NK cell_QUANTISEQ                            | 0.047347 |
| T cell CD4+ (non-regulatory)_QUANTISEQ       | 0.008517 |
| T cell CD8+_QUANTISEQ                        | 0.00096  |
| T cell regulatory (Tregs)_QUANTISEQ          | 0.000108 |
| uncharacterized cell_QUANTISEQ               | 1.49E-09 |
| T cell_MCPCOUNTER                            | 9.53E-05 |
| T cell CD8+_MCPCOUNTER                       | 0.000996 |
| cytotoxicity score_MCPCOUNTER                | 0.002516 |
| NK cell_MCPCOUNTER                           | 0.005022 |

|                                         |          |
|-----------------------------------------|----------|
| B cell_MCPCOUNTER                       | 2.14E-05 |
| Monocyte_MCPCOUNTER                     | 7.25E-11 |
| Macrophage/Monocyte_MCPCOUNTER          | 7.25E-11 |
| Myeloid dendritic cell_MCPCOUNTER       | 1.21E-13 |
| Neutrophil_MCPCOUNTER                   | 0.001903 |
| Endothelial cell_MCPCOUNTER             | 8.39E-08 |
| Cancer associated fibroblast_MCPCOUNTER | 4.32E-08 |
| Myeloid dendritic cell activated_XCELL  | 2.51E-07 |
| B cell_XCELL                            | 0.007491 |
| T cell CD4+ naive_XCELL                 | 0.000101 |
| T cell CD8+_XCELL                       | 0.005663 |
| T cell CD8+ central memory_XCELL        | 0.002383 |
| Class-switched memory B cell_XCELL      | 0.038072 |
| Common lymphoid progenitor_XCELL        | 0.029648 |
| Common myeloid progenitor_XCELL         | 0.037732 |
| Myeloid dendritic cell_XCELL            | 3.27E-05 |
| Endothelial cell_XCELL                  | 9.19E-05 |
| Cancer associated fibroblast_XCELL      | 3.24E-08 |
| Granulocyte-monocyte progenitor_XCELL   | 0.000464 |
| Hematopoietic stem cell_XCELL           | 1.38E-08 |
| Macrophage_XCELL                        | 0.000169 |
| Macrophage M1_XCELL                     | 1.52E-05 |
| Macrophage M2_XCELL                     | 0.002678 |
| Monocyte_XCELL                          | 8.51E-06 |
| B cell naive_XCELL                      | 0.000561 |
| T cell CD4+ Th1_XCELL                   | 3.63E-07 |
| immune score_XCELL                      | 2.50E-05 |
| stroma score_XCELL                      | 1.00E-07 |
| microenvironment score_XCELL            | 1.02E-08 |
| B cell_EPIC                             | 0.001139 |
| Cancer associated fibroblast_EPIC       | 2.21E-06 |
| T cell CD4+_EPIC                        | 0.004301 |
| Endothelial cell_EPIC                   | 3.20E-07 |
| Macrophage_EPIC                         | 2.26E-08 |
| uncharacterized cell_EPIC               | 2.62E-12 |
